# Supplementary material for: Application of human liver organoids as a patient-derived primary model for HBV infection and related hepatocellular carcinoma
Source: eLife. 2021 Jul 30;10:e60747. doi: 10.7554/eLife.60747 (PMC8384419; doi:10.7554/eLife.60747)
Supplement: Figure 1—figure supplement 2—source data 1. [file elife-60747-fig1-figsupp2-data1.xlsx]

## Sheet: Blad1
hD24	hD25	hD26	hD27
38448.3	22567.5	22535.1	63776.8
42744.9	23427.2	31256.7	70990.8
44650.8	23500.3	23623	58730.4
32406.3	34583.5	20341.5	62219
