# Supplementary material for: Application of human liver organoids as a patient-derived primary model for HBV infection and related hepatocellular carcinoma
Source: eLife. 2021 Jul 30;10:e60747. doi: 10.7554/eLife.60747 (PMC8384419; doi:10.7554/eLife.60747)
Supplement: Figure 1—figure supplement 2—source data 2. [file elife-60747-fig1-figsupp2-data2.xlsx]

## Sheet: Blad1
	Early passage				Late Passage
hD 24	38448.3	42744.9	44650.8	32406.3	39795.6	48803.1	54596.2	47012.1
hD 25	22567.5	23427.2	23500.3	34583.5	24980.5	23617.2	24138	21045.6
