# Supplementary material for: Application of human liver organoids as a patient-derived primary model for HBV infection and related hepatocellular carcinoma
Source: eLife. 2021 Jul 30;10:e60747. doi: 10.7554/eLife.60747 (PMC8384419; doi:10.7554/eLife.60747)
Supplement: Figure 1—source data 1. [file elife-60747-fig1-data1.xlsx]

## Sheet: Blad1
	Intracellular HBV DNA	cccDNA
HBV Plasmid	68748.8	58346.8
HBV Inoculum	52872.4	0.305788
hD24	44234.5	1257.44
hD25	26019.6	794.186
hD26	26895.9	602.928
hD27	63929.3	1018.96
