# Supplementary material for: Application of human liver organoids as a patient-derived primary model for HBV infection and related hepatocellular carcinoma
Source: eLife. 2021 Jul 30;10:e60747. doi: 10.7554/eLife.60747 (PMC8384419; doi:10.7554/eLife.60747)
Supplement: Figure 1—source data 2. [file elife-60747-fig1-data2.xlsx]

## Sheet: Blad1
neg	neg	positive	HepG2.215	uninfected	HI	hD20	hD29	hD25	hD1	hD24
1	0.91283	57.5794	63.1146	0.969154	1.08178	4.11742	2.61714	4.00772	5.43144	4.15846
