# Supplementary material for: Application of human liver organoids as a patient-derived primary model for HBV infection and related hepatocellular carcinoma
Source: eLife. 2021 Jul 30;10:e60747. doi: 10.7554/eLife.60747 (PMC8384419; doi:10.7554/eLife.60747)
Supplement: Figure 2—source data 1. [file elife-60747-fig2-data1.xlsx]

## Sheet: Blad1
hD20 qPCR					hD22 qPCR						hD23 qPCR
H.I	Ctrl	Teno 10µM	Fialu 10µM		HI	Ctrl	Teno 10µM	Fialu 10µM			HI	Ctrl	Teno 10µM	Fialu 10µM
0.567887	112.016	59.3498	42.4449		0.168084	133.632	65.398	21.3292			1.68084	45.9524	20.2295	15.2539
0.39903	90.6415	21.3292	33.4485		0.197012	105.308	64.2542	35.2667			1.97012	42.821	15.8018	9.47292
0.273058	97.2699	47.1848	49.3127			112.016	54.8196	44.359				44.359	19.8757	18.6854
0.543381	145.957	28.2865	40.2565									51.9933	18.3586	21.9012
			23.5028									37.8457
			27.7918									42.821
												40.9731
												53.3878
hD 20 RT-PCR					hD 22 RT-PCR						hD 23 RT-qPCR
H.I	Ctrl	Teno 10µM	Fialu 10µM		H.I	Ctrl	Teno 10µM	Fialu 10µM			HI	Ctrl	Teno 10µM	Fialu 10µM
0.034078	1	1.01748	0.96929		0.034078	1	1.07549	0.96929			0.021026	1	1.12376	1.00579
0.054978	1	1.29684	1.26138		0.054978	1	1.40932	1.02456			0.022692	1	1.04126	0.938438
		1.38032										1	1.20442	0.931956
												1	0.925518	1.20442
