# Supplementary material for: Application of human liver organoids as a patient-derived primary model for HBV infection and related hepatocellular carcinoma
Source: eLife. 2021 Jul 30;10:e60747. doi: 10.7554/eLife.60747 (PMC8384419; doi:10.7554/eLife.60747)
Supplement: Figure 2—source data 2. [file elife-60747-fig2-data2.xlsx]

## Sheet: Blad1
HepG2.2.15-qPCR
Ctrl	Teno 5µM	Fialu 5µM
498.341	284.561	254.393
535.568	361.8	244.412
584.865	284.561	296.181
643.833	269.055	328.664
HepG2.2.15-RT-qPCR
Ctrl	Teno 5µM	Fialu 5µM
1	0.993092	1.02811
1	1.07923	0.888843
1	1.19748	0.972655
1	1.28343	1.15669
