# Supplementary material for: Application of human liver organoids as a patient-derived primary model for HBV infection and related hepatocellular carcinoma
Source: eLife. 2021 Jul 30;10:e60747. doi: 10.7554/eLife.60747 (PMC8384419; doi:10.7554/eLife.60747)
Supplement: Figure 2—source data 3. [file elife-60747-fig2-data3.xlsx]

## Sheet: Blad1
	Day 2						Day 6
ctrl	100	100	100	100	100	100	100	100	100	100	100	100
1uM	136.645	172.179	65.2462	139.39	99.1172	106.76	91.6248	81.2211	128.06	71.7828	96.7152	141.064
5uM	112.999	108.307	108.307	136.571	107.016	106.117	113.963	93.3697	105.457	149.921	146.957	97.94
20uM	93.3167	146.536	161.742	99.0087	124.892	107.829	135.843	103.148	111.818	159.386	154.085	84.6274
1uM	114.349	144.02	91.5646	102.691	149.173	145.07	95.0936	99.0499	173.405	94.1682	78.306	159.096
5uM	125.385	98.9311	102.11	197.908		178.952	120.372	96.8395		165.271	90.4376
20uM	149.191	82.9043	116.059	130.171		147.264	154.599	112.786		80.9343	123.627
