# Supplementary material for: Application of human liver organoids as a patient-derived primary model for HBV infection and related hepatocellular carcinoma
Source: eLife. 2021 Jul 30;10:e60747. doi: 10.7554/eLife.60747 (PMC8384419; doi:10.7554/eLife.60747)
Supplement: Figure 2—source data 4. [file elife-60747-fig2-data4.xlsx]

## Sheet: Blad1
hD22
	Day 2				Day 6
Ctrl	100	100	100		100	100	100
1uM	81.775	71.0368	55.3134		60.7642	64.7098	58.8998
5uM	51.5428	54.006	60.7818	52.4549	49.4802	62.9568	44.0628	50.9378
20uM	61.5389	48.3579	42.3762		45.5628	48.9233	50.3862
1uM	69.1093	105.173	71.3884		74.4881	71.9023	88.4969
5uM	78.1093	62.5183	108.432	71.6746	91.2101	99.5908	86.8247	84.4786
20uM	93.3447	114.865	89.8562		67.1252	73.8833	65.9671
hD20
	Day 2				Day 6
Ctrl	100	100	100		100	100	100
1uM	90.7481	76.8034	84.0119		59.5524	53.0635	62.8235
5uM	99.4837	84.876	81.0303	88.9543	58.1718	51.3902	56.717	59.8556
20uM	82.5214	79.2044	78.9247		52.4314	47.7057	50.09
1uM	83.2697	108.468	100.013		75.8024	83.9566	88.7973
5uM	93.3175	96.903	109.024	95.7895	105.805	71.0356	78.0563	97.7679
20uM	99.5569	80.829	83.6681		57.4696	62.2736	69.2981
