# Supplementary material for: Application of human liver organoids as a patient-derived primary model for HBV infection and related hepatocellular carcinoma
Source: eLife. 2021 Jul 30;10:e60747. doi: 10.7554/eLife.60747 (PMC8384419; doi:10.7554/eLife.60747)
Supplement: Figure 3—source data 1. [file elife-60747-fig3-data1.xlsx]

## Sheet: Sheet1
Figure 3C- intracellular HBV RNA normalized to B2M and control
1	0.229433	hD1
1	0.284735	hD20
1	0.331818	hD28
