# Supplementary material for: Application of human liver organoids as a patient-derived primary model for HBV infection and related hepatocellular carcinoma
Source: eLife. 2021 Jul 30;10:e60747. doi: 10.7554/eLife.60747 (PMC8384419; doi:10.7554/eLife.60747)
Supplement: Figure 3—source data 2. [file elife-60747-fig3-data2.xlsx]

## Sheet: Sheet1
Figure 3D Right panel HBV DNA normalized							Figure 3D Left Panel HBV DNA copies/well
1	0.104065	hD1							hD1			hD20			hD28
1	0.297533	hD20							Mean	SD	N=	Mean	SD	N=	Mean	SD	N=
1	0.249888	hD28					Control		7405.85	1026.45	8	2229	284.3	2	1343	515.9	4
							Myr B		770.691	301.831	4	663.2	401.7	4	335.6	52.47	2
