# Supplementary material for: Application of human liver organoids as a patient-derived primary model for HBV infection and related hepatocellular carcinoma
Source: eLife. 2021 Jul 30;10:e60747. doi: 10.7554/eLife.60747 (PMC8384419; doi:10.7554/eLife.60747)
Supplement: Figure 4—figure supplement 1—source data 2. [file elife-60747-fig4-figsupp1-data2.xlsx]

## Sheet: Blad1
		iD-B1																	iP-BCC5																iP-BCC8														iP-BCC2
