# Supplementary material for: Application of human liver organoids as a patient-derived primary model for HBV infection and related hepatocellular carcinoma
Source: eLife. 2021 Jul 30;10:e60747. doi: 10.7554/eLife.60747 (PMC8384419; doi:10.7554/eLife.60747)
Supplement: Figure 5—figure supplement 1—source data 1. [file elife-60747-fig5-figsupp1-data1.xlsx]

## Sheet: Blad1
ADAMTS1	CCNA1	CORO1A	STAMN2	HBV RNA
1.06437	1.23114	1.56374	1.01748	111.817
1.95884	1.04972	2.92817	2.25793	129.787
	1.14076	5.02805	1.99308	42.9623
