# Supplementary material for: Application of human liver organoids as a patient-derived primary model for HBV infection and related hepatocellular carcinoma
Source: eLife. 2021 Jul 30;10:e60747. doi: 10.7554/eLife.60747 (PMC8384419; doi:10.7554/eLife.60747)
Supplement: Figure 5—source data 1. [file elife-60747-fig5-data1.xlsx]

## Sheet: Sheet1
ADAMTS1			CCNA1			CORO1A			PTHLH			STMN2			STY5
hD	HBV-iPH		hD	HBV-iPH		hD	HBV-iPH		hD	HBV-iPH		hD	iP		hD	HBV-iPH
0.682211	40.5967		2.06005	0.679563		1.94766	9.2007		1.09435	5.352		0.085073	1.31481		1.8497	7.58051
1.76331	24.4759		1.73229	0.191801		1.6549	5.10441		1.44902	2.07064		0.420405	2.77955		0.874964	4.32379
1.33634	2.69127		0.183351	3.04761		0.025858	9.01135		0.722003	1.41429		0.166069	19.1577		0.579265	7.34771
0.218134	40.8936		0.0243098	0.290633		0.37158	7.60992		0.734624	5.0897		3.32845	0.768157		0.696066	2.92549
	7.88051			1.00186			11.5654			5.04578			1.74697			16.764
