# Supplementary material for: Application of human liver organoids as a patient-derived primary model for HBV infection and related hepatocellular carcinoma
Source: eLife. 2021 Jul 30;10:e60747. doi: 10.7554/eLife.60747 (PMC8384419; doi:10.7554/eLife.60747)
Supplement: Supplementary file 1. [file elife-60747-supp1.xlsx]

## Sheet: Table S2 - Copy of heatmap_gene
Table S1: Gene expression signature
	log2 of DESeq normalized counts										DESeq normalized counts										Ratio of DESeq normalized counts to 3' UTR +/-500bp
gene_name	hD1	hD7	hD8	hD9	hD10	iP-BCC1	iP-BC	iP-BCC2	iP-BCC3	iP-BCC4	hD1	hD7	hD8	hD9	hD10	iP2	iP3	iP5	iP6	iP7	hD1	hD7	hD8	hD9	hD10	iP2	iP3	iP5	iP6	iP7
SPC24	5.78136	6.06609	6.50779	6.14975	6.24793	4.52356	6	4.52356	4.70044	5.20945	54	66	90	70	75	22	63	22	25	36	0.00615806	0.00752651	0.0102634	0.00798267	0.00855286	0.00250884	0.0071844	0.00250884	0.00285095	0.00410537
TMEM38A	5.58496	7.10852	5.83289	6.30378	6.33985	4.16993	5.32193	4.24793	4.85798	4.75489	47	137	56	78	80	17	39	18	28	26	0.0116049	0.0338272	0.0138272	0.0192593	0.0197531	0.00419753	0.00962963	0.00444444	0.00691358	0.00641975
TMEM229B	4.58496	5.78136	5.83289	5.70044	6.49185	5.55459	5.39232	3.90689	4.16993	3.70044	23	54	56	51	89	46	41	14	17	12	0.00182932	0.00429492	0.00445399	0.00405631	0.00707866	0.00365863	0.00326096	0.0011135	0.0013521	0.000954426
SLC39A5	5.04439	5.24793	6.80735	6.42626	6.06609	4.08746	5.32193	3	3.58496	5.12928	32	37	111	85	66	16	39	7	11	34	0.00516796	0.00597545	0.0179264	0.0137274	0.0106589	0.00258398	0.00629845	0.00113049	0.00177649	0.00549096
PDE4C	4.70044	5.72792	6.91886	5.04439	6.98868	4.39232	3.90689	3.90689	3.16993	5.52356	25	52	120	32	126	20	14	14	8	45	0.00132901	0.00276434	0.00637925	0.00170113	0.00669821	0.00106321	0.000744245	0.000744245	0.000425283	0.00239222
COLCA2	4.24793	6.89482	6.04439	4.58496	7.05528	3	5.12928	4.08746	4.24793	3.80735	18	118	65	23	132	7	34	16	18	13	0.0109823	0.0719951	0.0396583	0.0140329	0.0805369	0.0042709	0.0207444	0.00976205	0.0109823	0.00793167
ME1	4.32193	6.04439	4.90689	5.16993	7.12928	4.16993	4.32193	2.80735	4.32193	4.70044	19	65	29	35	139	17	19	6	19	25	0.00695716	0.0238008	0.0106188	0.0128158	0.0508971	0.00622483	0.00695716	0.002197	0.00695716	0.00915416
HHAT	5.64386	5.55459	5.45943	4.80735	4.58496	3.90689	5.20945	4.16993	3	4.08746	49	46	43	27	23	14	36	17	7	16	0.008901	0.00835604	0.00781108	0.00490463	0.00417802	0.00254314	0.00653951	0.0030881	0.00127157	0.00290645
UAP1L1	5.32193	5.24793	5.39232	4.58496	5.80735	3.45943	4.58496	4.08746	3	4.08746	39	37	41	23	55	10	23	16	7	16	0.00928129	0.00880533	0.00975726	0.00547358	0.013089	0.00237982	0.00547358	0.00380771	0.00166587	0.00380771
RAB6B	5.75489	5.42626	5.67243	4.52356	5.42626	4.75489	3.58496	4.08746	3.16993	4.08746	53	42	50	22	42	26	11	16	8	16	0.00646657	0.00512445	0.00610054	0.00268424	0.00512445	0.00317228	0.00134212	0.00195217	0.000976086	0.00195217
BHLHE41	5.42626	6.06609	5.78136	4.90689	5.93074	4.32193	4.70044	3.58496	4.70044	4.32193	42	66	54	29	60	19	25	11	25	19	0.00746269	0.0117271	0.00959488	0.00515281	0.010661	0.00337598	0.00444208	0.00195451	0.00444208	0.00337598
KLHL17	4.75489	5.35755	5.88264	5.08746	5	3.45943	3.80735	4.39232	4.85798	4.08746	26	40	58	33	31	10	13	20	28	16	0.00385699	0.00593384	0.00860406	0.00489542	0.00459872	0.00148346	0.0019285	0.00296692	0.00415369	0.00237354
NBPF3	6.32193	6.12928	5.78136	3.58496	6.47573	4	4.39232	3.90689	3.58496	4.24793	79	69	54	11	88	15	20	14	11	18	0.00784508	0.00685204	0.00536246	0.00109235	0.00873883	0.00148957	0.0019861	0.00139027	0.00109235	0.00178749
C2CD4B	4.75489	5.45943	6.56986	3.80735	6.06609	3	4.70044	4	3.58496	4.08746	26	43	94	13	66	7	25	15	11	16	0.0167634	0.027724	0.0606061	0.00838169	0.0425532	0.00451322	0.0161186	0.00967118	0.0070922	0.0103159
CTC1	6.18982	5.35755	5.24793	6.52356	5.70044	5.04439	5.32193	4.85798	3.58496	4.80735	72	40	37	91	51	32	39	28	11	27	0.00452176	0.00251209	0.00232368	0.005715	0.00320291	0.00200967	0.00244929	0.00175846	0.000690825	0.00169566
C15orf38	5.42626	5.64386	5.45943	5.58496	6.08746	5.32193	5.04439	4.52356	3	4.32193	42	49	43	47	67	39	32	22	7	19	0.0092328	0.0107716	0.00945263	0.0103319	0.0147285	0.00857331	0.00703451	0.00483623	0.0015388	0.00417674
CDHR5	5.67243	6.20945	6.47573	6.30378	5.97728	4.45943	4.70044	5.72792	2.80735	5.24793	50	73	88	78	62	21	25	52	6	37	0.00335616	0.00489999	0.00590683	0.0052356	0.00416163	0.00140959	0.00167808	0.0034904	0.000402739	0.00248355
ECM1	4.75489	6.44294	5.32193	5.20945	5.80735	4.08746	4.80735	4.90689	3.58496	4.45943	26	86	39	36	55	16	27	29	11	21	0.00509205	0.0168429	0.00763807	0.00705053	0.0107716	0.00313357	0.0052879	0.00567959	0.00215433	0.00411281
NBPF14	4.85798	5.12928	5.2854	6.2854	5.32193	3.32193	4.85798	4.75489	3.70044	4.70044	28	34	38	77	39	9	28	26	12	25	0.00623053	0.00756564	0.00845572	0.017134	0.00867824	0.00200267	0.00623053	0.00578549	0.00267023	0.00556297
SYT17	5.78136	5.88264	6.40939	5.52356	5.49185	3	5.42626	5.16993	4.52356	4.16993	54	58	84	45	44	7	42	35	22	17	0.00740639	0.00795501	0.0115211	0.00617199	0.00603484	0.000960088	0.00576053	0.00480044	0.00301742	0.00233164
CHST11	6.16993	5.20945	5	5.67243	5.61471	3.45943	3.90689	3.80735	4.24793	4.52356	71	36	31	50	48	10	14	13	18	22	0.00767319	0.00389063	0.00335026	0.00540365	0.00518751	0.00108073	0.00151302	0.00140495	0.00194532	0.00237761
DHRS13	5.97728	4.70044	4.80735	6.39232	5.9542	2.32193	3.80735	4.58496	3.70044	5.16993	62	25	27	83	61	4	13	23	12	35	0.0145951	0.00588512	0.00635593	0.0195386	0.0143597	0.00094162	0.00306026	0.00541431	0.00282486	0.00823917
DIAPH2	6.06609	5.75489	4.08746	5.52356	5.88264	2.58496	5.2854	4.32193	3.45943	4.85798	66	53	16	45	58	5	38	19	10	28	0.0080813	0.00648953	0.0019591	0.00550998	0.00710175	0.00061222	0.00465287	0.00232644	0.00122444	0.00342843
ZNF488	6.20945	4.08746	6.53916	6.12928	5.78136	2.58496	4.9542	3.70044	2.80735	5.32193	73	16	92	69	54	5	30	12	6	39	0.0168825	0.00370028	0.0212766	0.0159574	0.0124884	0.00115634	0.00693802	0.00277521	0.0013876	0.00901943
PDZD3	6.06609	7.03342	6.53916	6.53916	6.75489	1	6.2854	3	5.58496	4.9542	66	130	92	92	107	1	77	7	47	30	0.0110479	0.021761	0.0154001	0.0154001	0.0179109	0.000167392	0.0128892	0.00117174	0.00786743	0.00502176
MECOM	5.83289	6.71425	5.08746	6.40939	5.61471	1.58496	5.12928	4.39232	5.49185	3.58496	56	104	33	84	48	2	34	20	44	11	0.00502062	0.00932401	0.00295858	0.00753093	0.00430339	0.000179308	0.00304823	0.00179308	0.00394477	0.000986193
CLRN3	6.20945	5.61471	5.88264	5.88264	7.5157	1	5.39232	4.64386	4.32193	6.59991	73	48	58	58	182	1	41	24	19	96	0.0485372	0.0319149	0.0385638	0.0385638	0.121011	0.000664894	0.0272606	0.0159574	0.012633	0.0638298
CA2	5.16993	6.93074	6.40939	6.26679	7.43463	1.58496	4.52356	3.58496	3.45943	5	35	121	84	76	172	2	22	11	10	31	0.00352787	0.0121964	0.00846689	0.00766052	0.017337	0.000201593	0.00221752	0.00110876	0.00100796	0.00312469
SPP1	6.04439	6.04439	5.70044	7.62205	6.40939	4.16993	4.70044	5.78136	6.42626	4.45943	65	65	51	196	84	17	25	54	85	21	0.00973783	0.00973783	0.00764045	0.0293633	0.0125843	0.00254682	0.00374532	0.00808989	0.0127341	0.00314607
PIGB	6.35755	5.52356	4.64386	8.24793	5.83289	3	5.83289	5.16993	5.83289	4.58496	81	45	24	303	56	7	56	35	56	23	0.00590939	0.00328299	0.00175093	0.0221055	0.0040855	0.000510688	0.0040855	0.00255344	0.0040855	0.00167797
RP11-159D12.5	6.84549	7.30378	4.80735	6.33985	6.53916	3.45943	5.12928	5.55459	5.35755	5.16993	114	157	27	80	92	10	34	46	40	35	0.0814868	0.112223	0.0192995	0.0571837	0.0657613	0.00714796	0.0243031	0.0328806	0.0285919	0.0250179
ELFN2	6.90689	6.83289	7.34873	6.75489	6.91886	5.12928	5.45943	4.70044	5.32193	5.42626	119	113	162	107	120	34	43	25	39	42	0.0157366	0.0149431	0.0214229	0.0141497	0.0158688	0.00449617	0.00568633	0.003306	0.00515737	0.00555409
TTC39A	6.75489	6.22882	6.91886	5.70044	6.20945	5.78136	5.45943	5.20945	5.08746	5	107	74	120	51	73	54	43	36	33	31	0.00586655	0.00405724	0.00657931	0.00279621	0.00400241	0.00296069	0.00235759	0.00197379	0.00180931	0.00169965
PIDD	5.88264	6.74147	7.53138	6.83289	6	5.12928	4.64386	5.93074	5.78136	5.08746	58	106	184	113	63	34	24	60	54	33	0.00334776	0.00611833	0.0106205	0.00652237	0.00363636	0.00196248	0.00138528	0.0034632	0.00311688	0.00190476
GPRIN2	5.9542	5.58496	7.65105	6.39232	5.58496	5.49185	5.75489	5.20945	4.24793	5.72792	61	47	200	83	47	44	53	36	18	52	0.00955364	0.007361	0.0313234	0.0129992	0.007361	0.00689115	0.0083007	0.00563821	0.00281911	0.00814409
CCDC24	5.39232	5.52356	6.94251	8.01123	5.58496	5.08746	5.49185	5.52356	5.20945	4.80735	41	45	122	257	47	33	44	45	36	27	0.00604987	0.00664011	0.0180021	0.0379224	0.00693522	0.00486941	0.00649255	0.00664011	0.00531208	0.00398406
SLC6A20	5.45943	7	8.3443	6.18982	7.2854	3.45943	5.88264	6.02237	5.04439	5.70044	43	127	324	72	155	10	58	64	32	51	0.00517324	0.0152791	0.0389798	0.00866218	0.0186477	0.00120308	0.00697786	0.00769971	0.00384986	0.00613571
DACT2	4.9542	6.97728	7.55459	5.97728	7.03342	5.61471	6.37504	5.88264	4.9542	2.58496	30	125	187	62	130	48	82	58	30	5	0.00753012	0.0313755	0.0469378	0.0155622	0.0326305	0.0120482	0.0205823	0.0145582	0.00753012	0.00125502
ZBED3	5.88264	6.88264	6.33985	4.24793	6.56986	4.80735	4.90689	5.58496	4.90689	4.08746	58	117	80	18	94	27	29	47	29	16	0.00667434	0.0134638	0.00920598	0.00207135	0.010817	0.00310702	0.00333717	0.00540852	0.00333717	0.0018412
EHD2	5.20945	6.96578	5.90689	5.49185	6.02237	4	3.16993	5.61471	3.70044	3	36	124	59	44	64	15	8	48	12	7	0.00477707	0.0164544	0.00782909	0.00583864	0.00849257	0.00199045	0.00106157	0.00636943	0.00159236	0.000928875
WNK2	5.67243	6.62936	7.27612	5.80735	6.04439	4.64386	4.9542	4.39232	4.70044	2.58496	50	98	154	55	65	24	30	20	25	5	0.00173004	0.00339089	0.00532854	0.00190305	0.00224906	0.000830421	0.00103803	0.000692018	0.000865022	0.000173004
EVC	5.58496	6.06609	5.2854	5.78136	6.02237	3.58496	5.45943	5.04439	4.90689	2.32193	47	66	38	54	64	11	43	32	29	4	0.00350668	0.00492427	0.00283519	0.00402895	0.00477505	0.000820712	0.00320824	0.00238753	0.00216369	0.000298441
NAGPA	5.88264	5.61471	6.16993	7.01123	7.14975	5.20945	5.61471	5.67243	4.9542	5.04439	58	48	71	128	141	36	48	50	30	32	0.00485599	0.00401875	0.00594441	0.0107167	0.0118051	0.00301407	0.00401875	0.0041862	0.00251172	0.00267917
CYP2C18	6.2854	5.70044	6.24793	6.62936	6.88264	5.20945	5.24793	4.85798	4.24793	5.45943	77	51	75	98	117	36	37	28	18	43	0.0396498	0.0262616	0.03862	0.0504634	0.0602472	0.0185376	0.0190525	0.0144181	0.0092688	0.0221421
TMEM86B	5.88264	5.78136	6.53916	6.12928	7.37504	5.08746	6.04439	5.78136	3.45943	4.9542	58	54	92	69	165	33	65	54	10	30	0.0326577	0.0304054	0.0518018	0.0388514	0.0929054	0.0185811	0.0365991	0.0304054	0.00563063	0.0168919
DHRS11	6	6.74147	7.05528	7.40939	6.35755	5.20945	6.22882	6	3.16993	6.32193	63	106	132	169	81	36	74	63	8	79	0.0071074	0.0119585	0.0148917	0.0190659	0.00913809	0.00406137	0.00834838	0.0071074	0.000902527	0.00891245
ZXDC	6.56986	6.52356	5.72792	6.91886	6.47573	5.42626	5.97728	6.35755	3.16993	4.45943	94	91	52	120	88	42	62	81	8	21	0.0157322	0.0152301	0.00870293	0.0200837	0.014728	0.00702929	0.0103766	0.0135565	0.00133891	0.00351464
SLC12A8	5.61471	6.39232	6.30378	7.09803	5.72792	4.64386	5.24793	5.39232	5.39232	5.24793	48	83	78	136	52	24	37	41	41	37	0.00287563	0.00497244	0.0046729	0.00814762	0.00311526	0.00143781	0.00221663	0.00245627	0.00245627	0.00221663
LYPD6	6.16993	5.85798	6.30378	6.67243	5.32193	4.24793	4.70044	5.20945	4.70044	5.39232	71	57	78	101	39	18	25	36	25	41	0.0085697	0.0068799	0.0094146	0.0121907	0.0047073	0.0021726	0.0030175	0.0043452	0.0030175	0.0049487
RMI2	6.44294	6.37504	5.9542	7.49185	6.47573	5.08746	4.52356	5.2854	5.08746	6.59991	86	82	61	179	88	33	22	38	33	96	0.0240492	0.0229306	0.0170582	0.0500559	0.0246085	0.00922819	0.00615213	0.0106264	0.00922819	0.0268456
HMHA1	6.79442	6.02237	5.72792	6.82018	4.90689	4.08746	5.49185	4.80735	3.58496	5.9542	110	64	52	112	29	16	44	27	11	61	0.00489803	0.00284976	0.00231543	0.00498709	0.0012913	0.000712441	0.00195921	0.00120224	0.000489803	0.00271618
KRT13	7.30378	5.70044	8.87036	6.61471	6.84549	4.58496	4.70044	6.22882	3.45943	7.66534	157	51	467	97	114	23	25	74	10	202	0.017373	0.00564347	0.0516764	0.0107337	0.0126148	0.00254509	0.0027664	0.00818856	0.00110656	0.0223526
AIFM2	7.53138	6.49185	7.74819	6.37504	6.37504	4	5.24793	6	2.80735	6.72792	184	89	214	82	82	15	37	63	6	105	0.0267092	0.0129191	0.031064	0.011903	0.011903	0.00217738	0.00537088	0.00914501	0.000870954	0.0152417
AKR1C2	4.70044	7.69349	6.79442	8.20457	8.66534	3.90689	7.45121	7.03342	2.80735	5.9542	25	206	110	294	405	14	174	130	6	61	0.00225388	0.0185719	0.00991706	0.0265056	0.0365128	0.00126217	0.015687	0.0117202	0.00054093	0.00549946
SLC16A1	7.40088	8.19476	7.62936	7.33092	8.26209	4.39232	5.42626	5.08746	5.88264	7.04439	168	292	197	160	306	20	42	33	58	131	0.0163727	0.0284573	0.0191989	0.015593	0.0298217	0.00194913	0.00409317	0.00321606	0.00565247	0.0127668
NOSTRIN	7.13955	8.30378	6.08746	6.84549	7.24793	3.58496	6.50779	5.39232	6.12928	6.02237	140	315	67	114	151	11	90	41	69	64	0.00961605	0.0216361	0.00460196	0.00783021	0.0103716	0.000755546	0.00618174	0.00281613	0.00473934	0.00439591
MUC17	8.21917	6.62936	6.20945	6.33985	8.11894	3.45943	6.71425	4.85798	4.45943	6.94251	297	98	73	80	277	10	104	28	21	122	0.0302475	0.00998065	0.00743457	0.00814747	0.0282106	0.00101843	0.0105917	0.00285161	0.00213871	0.0124249
KIF13A	7.39232	6.37504	6.55459	7.31288	6.39232	4.08746	6.32193	6.08746	4.85798	6.40939	167	82	93	158	83	16	79	67	28	84	0.0108866	0.0053455	0.00606258	0.0102999	0.00541069	0.00104302	0.00514993	0.00436767	0.00182529	0.00547588
TNNI2	7.19967	7.74147	8.04439	6.2854	5.78136	3.80735	6.70044	3.16993	6.59991	4.45943	146	213	263	77	54	13	103	8	96	21	0.0579135	0.0844903	0.104324	0.0305434	0.0214201	0.00515668	0.0408568	0.00317334	0.0380801	0.00833003
CALB2	6.75489	8.14975	6.85798	5.90689	7.33092	4.90689	5.49185	2.32193	4.75489	6.35755	107	283	115	59	160	29	44	4	26	81	0.0345607	0.0914083	0.0371447	0.0190568	0.0516796	0.00936693	0.0142119	0.00129199	0.00839793	0.0261628
FABP1	10.0471	6.35755	6.2854	9.19229	6.47573	3.45943	5.04439	1.58496	4.90689	6.18982	1057	81	77	584	88	10	32	2	29	72	0.274332	0.0210226	0.0199844	0.15157	0.0228393	0.00259538	0.00830522	0.000519076	0.0075266	0.0186867
LYPD6B	5.80735	5.45943	5.67243	5.72792	4.80735	3	4.70044	4.52356	3.70044	2.80735	55	43	50	52	27	7	25	22	12	6	0.00483985	0.00378388	0.00439986	0.00457585	0.00237592	0.00061598	0.00219993	0.00193594	0.00105597	0.000527983
PASK	4.9542	4.85798	4.75489	5.35755	5.04439	2.58496	4.24793	4.45943	3	3.32193	30	28	26	40	32	5	18	21	7	9	0.00226313	0.00211225	0.00196138	0.0030175	0.002414	0.000377188	0.00135788	0.00158419	0.000528063	0.000678938
GLMN	5.85798	4.70044	4.64386	6.22882	4.58496	3.45943	4.52356	3.32193	4	2.32193	57	25	24	74	23	10	22	9	15	4	0.00775088	0.00339951	0.00326353	0.0100626	0.00312755	0.0013598	0.00299157	0.00122382	0.00203971	0.000543922
BTNL9	5.58496	4.45943	6.84549	6.62936	2.80735	2.32193	5.32193	4.39232	2.32193	2.32193	47	21	114	98	6	4	39	20	4	4	0.00421109	0.00188155	0.0102141	0.00878058	0.000537586	0.000358391	0.00349431	0.00179195	0.000358391	0.000358391
PF4	5.16993	5.90689	5.67243	7.93664	6	1.58496	5.55459	2.80735	2.80735	2	35	59	50	244	63	2	46	6	6	3	0.026455	0.0445956	0.0377929	0.184429	0.047619	0.00151172	0.0347695	0.00453515	0.00453515	0.00226757
DKK3	5.97728	6.35755	7.5157	6.18982	3.45943	2.32193	5.12928	3.45943	4.90689	3.70044	62	81	182	72	10	4	34	10	29	12	0.00608141	0.00794507	0.0178519	0.00706229	0.000980873	0.000392349	0.00333497	0.000980873	0.00284453	0.00117705
SPRR1A	7.70044	2.32193	6	6.26679	4.90689	0	3.90689	5.58496	2.32193	3.45943	207	4	63	76	29	0	14	47	4	10	0.137177	0.00265076	0.0417495	0.0503645	0.019218	0	0.00927767	0.0311465	0.00265076	0.00662691
GYG2	5.52356	5.52356	5.88264	5.64386	4.58496	0	6.40939	2.58496	0	3.90689	45	45	58	49	23	0	84	5	0	14	0.00691138	0.00691138	0.008908	0.00752573	0.00353248	0	0.0129012	0.000767931	0	0.00215021
SLC17A9	6.06609	6.10852	5.67243	6.04439	6.78136	3.70044	5.08746	3.90689	0	5.45943	66	68	50	65	109	12	33	14	0	43	0.0140875	0.0145144	0.0106724	0.0138741	0.0232657	0.00256137	0.00704376	0.00298826	0	0.00917823
MYZAP	5.12928	5.2854	4.80735	5.45943	5.97728	3	4	4.32193	1	4.9542	34	38	27	43	62	7	15	19	1	30	0.010198	0.0113977	0.00809838	0.0128974	0.0185963	0.00209958	0.0044991	0.00569886	0.00029994	0.0089982
MX1	4.70044	4.24793	6.02237	7.12928	5.55459	5.55459	5.12928	4	0	3	25	18	64	139	46	46	34	15	0	7	0.0016818	0.0012109	0.00430542	0.00935082	0.00309452	0.00309452	0.00228725	0.00100908	0	0.000470905
APBB1IP	5.64386	4.32193	5.24793	7.32193	4.64386	4.9542	4.85798	3.32193	0	4.80735	49	19	37	159	24	30	28	9	0	27	0.010506	0.00407376	0.0079331	0.0340909	0.0051458	0.00643225	0.00600343	0.00192967	0	0.00578902
PPBP	6.04439	4.85798	5.70044	9.48382	2	4.85798	4.64386	5.85798	0	4.39232	65	28	51	715	3	28	24	57	0	20	0.0454545	0.0195804	0.0356643	0.5	0.0020979	0.0195804	0.0167832	0.0398601	0	0.013986
IFI27	5.32193	8.70736	4.24793	8.11894	11.9833	4.39232	3.58496	3.58496	5.24793	2.32193	39	417	18	277	4048	20	11	11	37	4	0.00616698	0.0659393	0.0028463	0.0438014	0.640101	0.00316256	0.00173941	0.00173941	0.00585073	0.000632511
CLDN18	3.58496	7.99435	5.70044	4	9.51964	5.20945	4.39232	7.39232	5.24793	0	11	254	51	15	733	36	20	167	37	0	0.00222988	0.05149	0.0103385	0.00304075	0.148591	0.00729779	0.00405433	0.0338536	0.00750051	0
ANKRD50	5.2854	5.24793	4.80735	4.24793	4.16993	6.42626	5.80735	5.04439	6.53916	5.52356	38	37	27	18	17	85	55	32	92	45	0.00671259	0.00653595	0.00476948	0.00317965	0.003003	0.015015	0.0097156	0.00565271	0.0162515	0.00794913
PKIG	4.90689	5	4.70044	3.58496	4.70044	6.45943	5.80735	5.16993	6.14975	5.2854	29	31	25	11	25	87	55	35	70	38	0.00639894	0.00684025	0.00551633	0.00242718	0.00551633	0.0191968	0.0121359	0.00772286	0.0154457	0.00838482
SH3BP5	4.32193	4.70044	4.75489	4.24793	3.58496	6.24793	5.45943	4.58496	6.26679	5.35755	19	25	26	18	11	75	43	23	76	40	0.00189149	0.0024888	0.00258835	0.00179194	0.00109507	0.0074664	0.00428074	0.0022897	0.00756595	0.00398208
ACAP1	4.08746	5.12928	5.16993	3.32193	4.52356	6.42626	6.84549	5.58496	4.90689	4.90689	16	34	35	9	22	85	114	47	29	29	0.00185507	0.00394203	0.00405797	0.00104348	0.00255072	0.00985507	0.0132174	0.00544928	0.00336232	0.00336232
RNF144B	4.08746	4.16993	5.12928	2	5.52356	5.83289	5.24793	5.70044	5.97728	5.72792	16	17	34	3	45	56	37	51	62	52	0.00258106	0.00274238	0.00548476	0.000483949	0.00725924	0.00903372	0.0059687	0.00822713	0.0100016	0.00838845
ST6GAL2	4.52356	4.08746	4.45943	5.52356	4.64386	5.90689	5.42626	6.83289	6.53916	4.75489	22	16	21	45	24	59	42	113	92	26	0.00251947	0.00183234	0.00240495	0.00515346	0.00274851	0.00675676	0.00480989	0.0129409	0.010536	0.00297755
ZNF551	3.70044	4.45943	4.08746	4.75489	4.45943	5.72792	5.24793	5.55459	5.67243	5.04439	12	21	16	26	21	52	37	46	50	32	0.00165175	0.00289057	0.00220234	0.0035788	0.00289057	0.0071576	0.00509291	0.00633173	0.00688231	0.00440468
ATF3	2.58496	4.90689	3.70044	2.58496	5.42626	4.70044	5.83289	7.58496	6.30378	4	5	29	12	5	42	25	56	191	78	15	0.00174338	0.0101116	0.0041841	0.00174338	0.0146444	0.00871688	0.0195258	0.0665969	0.0271967	0.00523013
FGA	2.58496	3.80735	5.08746	4	3	4.24793	5.85798	6.71425	5.90689	3	5	13	33	15	7	18	57	104	59	7	0.00137969	0.0035872	0.00910596	0.00413907	0.00193157	0.00496689	0.0157285	0.0286976	0.0162804	0.00193157
GZF1	4.32193	3.58496	2.58496	4.39232	3.70044	4.39232	4.9542	5.2854	6.49185	4.9542	19	11	5	20	12	20	30	38	89	30	0.00304976	0.00176565	0.000802568	0.00321027	0.00192616	0.00321027	0.00481541	0.00609952	0.0142857	0.00481541
SESN3	5.35755	4.08746	2.58496	3.45943	2	5.67243	4.32193	4.64386	7.45943	4.08746	40	16	5	10	3	50	19	24	175	16	0.00311163	0.00124465	0.000388954	0.000777907	0.000233372	0.00388954	0.00147802	0.00186698	0.0136134	0.00124465
EVA1B	4.16993	3.45943	3.32193	3.80735	3.16993	7.11894	3.90689	4.45943	5.83289	5.42626	17	10	9	13	8	138	14	21	56	42	0.0116438	0.00684932	0.00616438	0.00890411	0.00547945	0.0945205	0.00958904	0.0143836	0.0383562	0.0287671
CD14	2.32193	3.90689	3.80735	4.45943	2.58496	4.70044	4.08746	4.16993	7.20945	4.45943	4	14	13	21	5	25	16	17	147	21	0.0010543	0.00369004	0.00342646	0.00553506	0.00131787	0.00658935	0.00421719	0.00448076	0.0387454	0.00553506
RAPGEF3	4.08746	3	4.80735	2.58496	3.45943	5.64386	5.39232	5.55459	5.35755	3.45943	16	7	27	5	10	49	41	46	40	10	0.000484907	0.000212147	0.000818281	0.000151534	0.000303067	0.00148503	0.00124257	0.00139411	0.00121227	0.000303067
PTHLH	3.58496	2.32193	4.08746	2	2.32193	5.58496	5.45943	4.64386	4.52356	4.39232	11	4	16	3	4	47	43	24	22	20	0.00168789	0.000613779	0.00245512	0.000460335	0.000613779	0.00721191	0.00659813	0.00368268	0.00337579	0.0030689
ADAMTS1	3.45943	2.80735	3.90689	4.16993	3	5.49185	6.96578	5.2854	4.70044	3.32193	10	6	14	17	7	44	124	38	25	9	0.00150173	0.000901036	0.00210242	0.00255294	0.00105121	0.0066076	0.0186214	0.00570656	0.00375432	0.00135155
UGT2B11	4.16993	1.58496	2.58496	6.08746	4.52356	2.58496	6.52356	6.64386	6.87036	6.70044	17	2	5	67	22	5	91	99	116	103	0.00590073	0.000694203	0.00173551	0.0232558	0.00763624	0.00173551	0.0315863	0.0343631	0.0402638	0.0357515
UGT2B7	3.80735	4.32193	4.45943	5.45943	6.33985	5.9542	5.45943	6.45943	6.52356	6.90689	13	19	21	43	80	61	43	87	91	119	0.00447813	0.00654495	0.0072339	0.0148123	0.0275577	0.0210127	0.0148123	0.029969	0.0313469	0.0409921
FRG1B	4.32193	5.16993	3	4.52356	5.64386	6.30378	5.80735	5.64386	6.06609	6.08746	19	35	7	22	49	78	55	49	66	67	0.00252123	0.00464437	0.000928875	0.00291932	0.00650212	0.0103503	0.0072983	0.00650212	0.00875796	0.00889066
CENPC	4.58496	5.04439	3	5.35755	5.55459	6.47573	4.80735	5.12928	5.52356	8.19476	23	32	7	40	46	88	27	34	45	292	0.00123689	0.00172089	0.000376445	0.00215112	0.00247378	0.00473245	0.001452	0.00182845	0.00242001	0.0157031
COPG2	4.16993	5.32193	3.32193	3.32193	5.04439	7.15987	4.52356	4.9542	4.45943	6.58496	17	39	9	9	32	142	22	30	21	95	0.00422886	0.00970149	0.00223881	0.00223881	0.0079602	0.0353234	0.00547264	0.00746269	0.00522388	0.0236318
BEX5	3.32193	4.24793	3.80735	2.80735	5.39232	7.54689	2.58496	6.75489	5.49185	6.06609	9	18	13	6	41	186	5	107	44	66	0.003443	0.006886	0.00497322	0.00229533	0.0156848	0.0711553	0.00191278	0.0409334	0.0168324	0.0252487
IFT52	4.90689	5.45943	5.58496	5.61471	4.70044	6.64386	5.80735	5.80735	6.75489	6.44294	29	43	47	48	25	99	55	55	107	86	0.0045059	0.00668117	0.00730267	0.00745805	0.0038844	0.0153822	0.00854568	0.00854568	0.0166252	0.0133623
PEX11G	4.70044	4.70044	5.67243	5.08746	5.49185	6.87036	5.9542	5.42626	6.45943	6.14975	25	25	50	33	44	116	61	42	87	70	0.016415	0.016415	0.0328299	0.0216678	0.0288903	0.0761655	0.0400525	0.0275772	0.0571241	0.0459619
PLEKHG5	5.55459	5.35755	4.90689	5.20945	6.12928	7.66534	6	5.88264	6.06609	7.24793	46	40	29	36	69	202	63	58	66	151	0.0118771	0.0103279	0.00748774	0.00929512	0.0178156	0.052156	0.0162665	0.0149755	0.0170411	0.0389879
C4orf48	5.90689	3.90689	5.78136	5.70044	3.80735	8.25739	4.39232	6.2854	7.01123	6.74147	59	14	54	51	13	305	20	77	128	106	0.0475806	0.0112903	0.0435484	0.041129	0.0104839	0.245968	0.016129	0.0620968	0.103226	0.0854839
NEDD8-MDP1	6.80735	7.05528	6.2854	6.42626	6.58496	7.78136	7.97154	7.20945	8.88264	6.74147	111	132	77	85	95	219	250	147	471	106	0.0190231	0.0226221	0.0131962	0.0145673	0.0162811	0.0375321	0.0428449	0.0251928	0.0807198	0.0181662
CASP4	6.79442	6.62936	6.53916	5.83289	6.83289	7.98868	7.67243	7.44294	7.94837	6.82018	110	98	92	56	113	253	203	173	246	112	0.0113683	0.0101282	0.00950806	0.00578752	0.0116784	0.0261472	0.0209797	0.0178793	0.0254237	0.011575
GABBR1	6.6865	6.12928	6.26679	6.45943	6.12928	8.59619	7.82018	6.67243	7.78136	6.24793	102	69	76	87	69	386	225	101	219	75	0.0034804	0.00235439	0.00259324	0.00296857	0.00235439	0.0131709	0.00767735	0.00344628	0.00747262	0.00255912
MDP1	6.20945	6.47573	5.49185	5.80735	5.97728	7.16993	7.37504	6.64386	8.27146	5.93074	73	88	44	55	62	143	165	99	308	60	0.0284379	0.0342813	0.0171406	0.0214258	0.0241527	0.0557071	0.0642774	0.0385664	0.119984	0.0233736
PFDN4	6.67243	6.24793	6.18982	6.45943	6.14975	7.98299	6.62936	6.91886	7.83289	7.54689	101	75	72	87	70	252	98	120	227	186	0.0181916	0.0135086	0.0129683	0.01567	0.0126081	0.045389	0.0176513	0.0216138	0.0408862	0.0335014
MED21	6.52356	6.79442	5.24793	6.89482	6.47573	6.20945	7.72792	7.10852	8.23362	7.65105	91	110	37	118	88	73	211	137	300	200	0.00880844	0.0106476	0.00358145	0.0114219	0.00851805	0.00706611	0.020424	0.0132611	0.0290388	0.0193592
MAPK11	5.9542	5.85798	6.04439	5.90689	4.58496	8.08746	5.9542	7.26679	7.6865	6.74147	61	57	65	59	23	271	61	153	205	106	0.00800105	0.00747639	0.00852571	0.00773872	0.00301679	0.0355456	0.00800105	0.0200682	0.0268888	0.0139035
PTK7	4.85798	5.97728	5.83289	5.49185	4.08746	8.40939	6.78136	7.12928	6.40939	6.26679	28	62	56	44	16	339	109	139	84	76	0.00112949	0.00250101	0.00225898	0.00177491	0.000645422	0.0136749	0.00439693	0.0056071	0.00338846	0.00306575
LRG1	6.10852	6.08746	6.72792	4.70044	4.85798	6.89482	6.90689	6.82018	7.83289	5.72792	68	67	105	25	28	118	119	112	227	52	0.0173337	0.0170788	0.0267652	0.00637267	0.00713739	0.030079	0.0303339	0.0285496	0.0578639	0.0132552
PTGES	7.5157	5.85798	6.35755	6.50779	5.20945	9.72451	7.74819	7.26679	7.20945	7.15987	182	57	81	90	36	845	214	153	147	142	0.0735057	0.023021	0.0327141	0.0363489	0.0145396	0.341276	0.0864297	0.0617932	0.05937	0.0573506
HLA-DMA	6.30378	3.90689	7.12928	2.80735	6.78136	8.40939	7.63662	7.03342	7.48382	4.45943	78	14	139	6	109	339	198	130	178	21	0.0154916	0.00278054	0.0276068	0.00119166	0.0216485	0.0673287	0.0393247	0.0258193	0.0353525	0.0041708
CST6	5.83289	4.52356	3.80735	5.2854	3.90689	8.55459	6.14975	5.32193	7.53138	4.39232	56	22	13	38	14	375	70	39	184	20	0.0430438	0.0169101	0.00999231	0.0292083	0.010761	0.28824	0.0538048	0.0299769	0.14143	0.0153728
UBD	5.24793	3.58496	4.90689	4.32193	3.16993	8.40514	7.09803	2.80735	7.12928	4.58496	37	11	29	19	8	338	136	6	139	23	0.0237028	0.00704676	0.0185778	0.0121717	0.00512492	0.216528	0.0871236	0.00384369	0.0890455	0.0147341
EFEMP1	6.62936	5.08746	3.32193	3.58496	2	7.12928	6.72792	5.64386	6.30378	6.39232	98	33	9	11	3	139	105	49	78	83	0.0155556	0.0052381	0.00142857	0.00174603	0.00047619	0.0220635	0.0166667	0.00777778	0.012381	0.0131746
MFAP5	7.6865	1	1	5.52356	4.90689	9.77643	7.36632	5.35755	6.65821	6.90689	205	1	1	45	29	876	164	40	100	119	0.018887	9.21319e-05	9.21319e-05	0.00414594	0.00267183	0.0807076	0.0151096	0.00368528	0.00921319	0.0109637
ZNF765	5.16993	4.85798	4.52356	4.52356	4.58496	1	3.80735	4	4.58496	2.80735	35	28	22	22	23	1	13	15	23	6	0.00269417	0.00215534	0.00169348	0.00169348	0.00177046	7.69764e-05	0.00100069	0.00115465	0.00177046	0.000461858
CREG2	4.39232	4.32193	3.90689	4.52356	5.04439	1.58496	3.45943	3.80735	3.90689	2.32193	20	19	14	22	32	2	10	13	14	4	0.00223214	0.00212054	0.0015625	0.00245536	0.00357143	0.000223214	0.00111607	0.00145089	0.0015625	0.000446429
SLC9A4	4.80735	5.12928	4.52356	4.32193	4.85798	0	2.58496	2.80735	4.52356	3	27	34	22	19	28	0	5	6	22	7	0.00734494	0.00924918	0.00598477	0.00516866	0.00761697	0	0.00136017	0.00163221	0.00598477	0.00190424
PSAPL1	4.75489	4.75489	5.08746	5.72792	6.49185	0	3.16993	4.08746	3.90689	2.32193	26	26	33	52	89	0	8	16	14	4	0.00647088	0.00647088	0.00821304	0.0129418	0.0221503	0	0.00199104	0.00398208	0.00348432	0.00099552
UVSSA	4.58496	5.70044	5.83289	5.04439	4.90689	1.58496	4.58496	5.04439	2.32193	0	23	51	56	32	29	2	23	32	4	0	0.00261364	0.00579545	0.00636364	0.00363636	0.00329545	0.000227273	0.00261364	0.00363636	0.000454545	0
TLR6	4.39232	5	3.45943	4.9542	5.85798	0	3.16993	4	2.32193	0	20	31	10	30	57	0	8	15	4	0	0.0033687	0.00522149	0.00168435	0.00505306	0.00960081	0	0.00134748	0.00252653	0.000673741	0
TMEM231	4.52356	4.45943	4.45943	4.52356	4	3.45943	2.58496	2	3.16993	3	22	21	21	22	15	10	5	3	8	7	0.00273598	0.00261162	0.00261162	0.00273598	0.00186544	0.00124363	0.000621813	0.000373088	0.000994901	0.000870538
GRK4	4.90689	4.64386	4.52356	4.24793	2	4.08746	2.32193	2.58496	2.32193	2	29	24	22	18	3	16	4	5	4	3	0.0038431	0.00318049	0.00291545	0.00238537	0.000397562	0.00212033	0.000530082	0.000662603	0.000530082	0.000397562
IRAK2	4.39232	4.52356	3.90689	5.35755	4.58496	4.90689	3.16993	3.16993	2	1.58496	20	22	14	40	23	29	8	8	3	2	0.00737735	0.00811509	0.00516415	0.0147547	0.00848395	0.0106972	0.00295094	0.00295094	0.0011066	0.000737735
BPIFB1	5	4.08746	5.93074	4.52356	3.70044	3.80735	3.32193	3.16993	4.32193	0	31	16	60	22	12	13	9	8	19	0	0.00838064	0.00432549	0.0162206	0.00594755	0.00324412	0.00351446	0.00243309	0.00216275	0.00513652	0
SEC16B	4.70044	5.55459	4.45943	2.80735	3.16993	2.32193	4.08746	2.32193	3	1	25	46	21	6	8	4	16	4	7	1	0.000963986	0.00177373	0.000809748	0.000231357	0.000308475	0.000154238	0.000616951	0.000154238	0.000269916	3.85594e-05
RUSC2	4.24793	4.08746	3.90689	3.58496	3.90689	2.58496	2.32193	3	1	0	18	16	14	11	14	5	4	7	1	0	0.00618982	0.00550206	0.00481431	0.00378267	0.00481431	0.00171939	0.00137552	0.00240715	0.000343879	0
AGAP5	4	4.9542	4.64386	4.90689	3.58496	2.32193	4.08746	3.58496	2	3	15	30	24	29	11	4	16	11	3	7	0.00292512	0.00585023	0.00468019	0.00565523	0.00214509	0.000780031	0.00312012	0.00214509	0.000585023	0.00136505
AGMO	4.32193	4.32193	4.9542	4.39232	4.85798	0	3.80735	3.32193	1	3.32193	19	19	30	20	28	0	13	9	1	9	0.00307942	0.00307942	0.00486224	0.00324149	0.00453809	0	0.00210697	0.00145867	0.000162075	0.00145867
SLC35F3	5.39232	5.39232	4.90689	3.45943	3.32193	1.58496	4.58496	3.58496	0	3.16993	41	41	29	10	9	2	23	11	0	8	0.0166059	0.0166059	0.0117456	0.00405022	0.0036452	0.000810045	0.00931551	0.00445525	0	0.00324018
SIMC1	3.80735	4.08746	5	2.58496	4.9542	3.32193	2.58496	2.80735	1	2.80735	13	16	31	5	30	9	5	6	1	6	0.00142357	0.00175208	0.00339466	0.000547525	0.00328515	0.000985545	0.000547525	0.00065703	0.000109505	0.00065703
CIDEC	3.32193	3.80735	5.08746	4	4.32193	2.32193	2	1.58496	0	2.58496	9	13	33	15	19	4	3	2	0	5	0.00320057	0.00462304	0.0117354	0.00533428	0.00675676	0.00142248	0.00106686	0.000711238	0	0.00177809
TNFRSF1B	4.64386	5.49185	5.08746	4.90689	6.49185	3.58496	4.52356	2.32193	1	2.80735	24	44	33	29	89	11	22	4	1	6	0.00414079	0.00759144	0.00569358	0.00500345	0.0153554	0.00189786	0.00379572	0.000690131	0.000172533	0.0010352
MOGAT3	4.39232	4.75489	4.90689	4.85798	5.20945	2	4.32193	2.32193	0	3.90689	20	26	29	28	36	3	19	4	0	14	0.00904159	0.0117541	0.0131103	0.0126582	0.0162749	0.00135624	0.00858951	0.00180832	0	0.00632911
CYP4F2	2.58496	6.10852	5	3.32193	7.33092	3	4.85798	2.80735	0	3.32193	5	68	31	9	160	7	28	6	0	9	0.000530335	0.00721256	0.00328808	0.000954603	0.0169707	0.000742469	0.00296988	0.000636402	0	0.000954603
ANK1	3.32193	6.20945	6.74147	4.45943	5.83289	3.45943	5.12928	4.58496	0	0	9	73	106	21	56	10	34	23	0	0	0.000733855	0.00595238	0.00864318	0.00171233	0.00456621	0.000815395	0.00277234	0.00187541	0	0
PDZK1	4.39232	3.80735	3.90689	4.52356	1.58496	0	3.45943	1.58496	0	2.58496	20	13	14	22	2	0	10	2	0	5	0.00703482	0.00457263	0.00492438	0.0077383	0.000703482	0	0.00351741	0.000703482	0	0.00175871
SHANK3	2.80735	3	3.80735	4.85798	2.58496	0	2.58496	2	0	3	6	7	13	28	5	0	5	3	0	7	0.00188561	0.00219987	0.00408548	0.0087995	0.00157134	0	0.00157134	0.000942803	0	0.00219987
TMEM27	4.58496	3.80735	3	4.45943	2.80735	1	3.58496	1.58496	0	1	23	13	7	21	6	1	11	2	0	1	0.0124392	0.00703083	0.00378583	0.0113575	0.003245	0.000540833	0.00594916	0.00108167	0	0.000540833
ADRA2C	2.80735	4.39232	4.90689	4.08746	2	1	3.80735	0	1	2.32193	6	20	29	16	3	1	13	0	1	4	0.0035461	0.0118203	0.0171395	0.00945626	0.00177305	0.000591017	0.00768322	0	0.000591017	0.00236407
C2CD4A	3.32193	4.32193	6.24793	4.52356	3.58496	1	2.80735	3	0	2.32193	9	19	75	22	11	1	6	7	0	4	0.00265487	0.00560472	0.0221239	0.00648968	0.00324484	0.000294985	0.00176991	0.0020649	0	0.00117994
RNF157	2	4.75489	4.39232	4.45943	3	1	3.45943	2.58496	1	2	3	26	20	21	7	1	10	5	1	3	0.00026476	0.00229459	0.00176507	0.00185332	0.000617774	8.82535e-05	0.000882535	0.000441267	8.82535e-05	0.00026476
SOWAHD	1.58496	2.80735	4.45943	3	4	0	2.58496	1.58496	0	1.58496	2	6	21	7	15	0	5	2	0	2	0.00126183	0.00378549	0.0132492	0.0044164	0.00946372	0	0.00315457	0.00126183	0	0.00126183
KCNH3	2.58496	1	4.90689	4.90689	4.80735	3	3.16993	0	0	2.32193	5	1	29	29	27	7	8	0	0	4	0.000972952	0.00019459	0.00564312	0.00564312	0.00525394	0.00136213	0.00155672	0	0	0.000778362
USPL1	2.80735	3.32193	2.32193	4.90689	6.12928	1.58496	3.16993	3.45943	1	2.58496	6	9	4	29	69	2	8	10	1	5	0.00232108	0.00348162	0.00154739	0.0112186	0.0266925	0.000773694	0.00309478	0.00386847	0.000386847	0.00193424
EPSTI1	4.16993	3	1	6.26679	4.24793	1.58496	3.32193	1.58496	2.32193	1	17	7	1	76	18	2	9	2	4	1	0.00133964	0.000551615	7.88022e-05	0.00598897	0.00141844	0.000157604	0.00070922	0.000157604	0.000315209	7.88022e-05
PINLYP	3.58496	4.70044	4.64386	2	2	1	2	2.80735	2.32193	0	11	25	24	3	3	1	3	6	4	0	0.00298022	0.00677323	0.0065023	0.000812788	0.000812788	0.000270929	0.000812788	0.00162558	0.00108372	0
SLC13A3	3.90689	3.45943	5.39232	2	1	0	2	2.80735	2.32193	0	14	10	41	3	1	0	3	6	4	0	0.001412	0.00100857	0.00413515	0.000302572	0.000100857	0	0.000302572	0.000605144	0.000403429	0
FOXD2	3.70044	4.39232	4.70044	3.45943	3.32193	0	2.58496	4	2.32193	0	12	20	25	10	9	0	5	15	4	0	0.00580552	0.00967586	0.0120948	0.00483793	0.00435414	0	0.00241896	0.00725689	0.00193517	0
IL1RL1	2.32193	4.64386	4.16993	3	4.58496	0	1	2	3.70044	0	4	24	17	7	23	0	1	3	12	0	0.000350018	0.00210011	0.00148757	0.000612531	0.0020126	0	8.75044e-05	0.000262513	0.00105005	0
GSTA1	2	2.58496	5.12928	3.45943	4.58496	0	1	2	3	0	3	5	34	10	23	0	1	3	7	0	0.00116009	0.00193349	0.0131477	0.00386698	0.00889404	0	0.000386698	0.00116009	0.00270688	0
METTL21B	2	5.35755	4.08746	3.45943	3.45943	1	2.80735	1	2	0	3	40	16	10	10	1	6	1	3	0	0.000644192	0.00858922	0.00343569	0.00214731	0.00214731	0.000214731	0.00128838	0.000214731	0.000644192	0
SLC14A1	0	4.80735	3.45943	3.45943	3.16993	1.58496	1	2.32193	1	0	0	27	10	10	8	2	1	4	1	0	0	0.00217216	0.000804505	0.000804505	0.000643604	0.000160901	8.04505e-05	0.000321802	8.04505e-05	0
ODAM	1	5.49185	3.90689	0	3.45943	0	2.32193	1.58496	1	0	1	44	14	0	10	0	4	2	1	0	0.000115835	0.00509672	0.00162168	0	0.00115835	0	0.000463338	0.000231669	0.000115835	0
DNHD1	4.08746	5.32193	4.70044	2.32193	4.80735	0	4.08746	4.64386	0	0	16	39	25	4	27	0	16	24	0	0	0.000649482	0.00158311	0.00101482	0.000162371	0.001096	0	0.000649482	0.000974224	0	0
SULT1B1	2.80735	5	3.16993	1	6.12928	0	3.80735	2.32193	0	1	6	31	8	1	69	0	13	4	0	1	0.00063065	0.00325836	0.000840866	0.000105108	0.00725247	0	0.00136641	0.000420433	0	0.000105108
TMEM213	3	7.79442	4.45943	1.58496	2	0	1	4.45943	0	1	7	221	21	2	3	0	1	21	0	1	0.00095277	0.0300803	0.00285831	0.00027222	0.00040833	0	0.00013611	0.00285831	0	0.00013611
SULT1C2	2.58496	5.24793	0	3.90689	7.32193	0	1	1	0	1	5	37	0	14	159	0	1	1	0	1	0.00067331	0.00498249	0	0.00188527	0.0214113	0	0.000134662	0.000134662	0	0.000134662
GKN1	2	6.90689	0	0	6.71425	0	0	1	0	0	3	119	0	0	104	0	0	1	0	0	0.00117971	0.0467951	0	0	0.0408966	0	0	0.000393236	0	0
CCNB3	4	4.52356	0	1.58496	4.90689	2	2	0	0	0	15	22	0	2	29	3	3	0	0	0	0.0015868	0.0023273	0	0.000211573	0.00306781	0.00031736	0.00031736	0	0	0
PGC	6.37504	5.16993	3	0	7.3837	4.70044	2.58496	0	0	3.45943	82	35	7	0	166	25	5	0	0	10	0.0161991	0.00691426	0.00138285	0	0.0327934	0.00493876	0.000987752	0	0	0.0019755
RGN	2.58496	1.58496	3.32193	2	1.58496	1	1	1	0	0	5	2	9	3	2	1	1	1	0	0	0.00181291	0.000725163	0.00326323	0.00108774	0.000725163	0.000362582	0.000362582	0.000362582	0	0
TUBA8	2.80735	2	2.32193	2.32193	1.58496	0	1	1	0	0	6	3	4	4	2	0	1	1	0	0	0.00125865	0.000629327	0.000839102	0.000839102	0.000419551	0	0.000209776	0.000209776	0	0
CYP3A4	2.58496	2	3.32193	1.58496	2.32193	0	1	1	1	1	5	3	9	2	4	0	1	1	1	1	0.00105485	0.000632911	0.00189873	0.000421941	0.000843882	0	0.00021097	0.00021097	0.00021097	0.00021097
C7orf31	3.45943	2.58496	2.32193	1.58496	2.32193	1.58496	0	1.58496	0	0	10	5	4	2	4	2	0	2	0	0	0.00165044	0.000825219	0.000660175	0.000330087	0.000660175	0.000330087	0	0.000330087	0	0
CTD-3193O13.9	3	1.58496	3.16993	1.58496	2	1	0	0	0	0	7	2	8	2	3	1	0	0	0	0	0.00463576	0.0013245	0.00529801	0.0013245	0.00198675	0.000662252	0	0	0	0
CA14	3.45943	3.70044	3.32193	2	2.58496	0	0	1.58496	0	0	10	12	9	3	5	0	0	2	0	0	0.00101812	0.00122175	0.00091631	0.000305437	0.000509061	0	0	0.000203625	0	0
ACRC	2.80735	3.70044	2.58496	2.80735	1	0	0	1	0	0	6	12	5	6	1	0	0	1	0	0	0.00311688	0.00623377	0.0025974	0.00311688	0.000519481	0	0	0.000519481	0	0
NR1H4	2.32193	1	2.58496	2.80735	2.58496	0	0	0	0	1	4	1	5	6	5	0	0	0	0	1	0.000432479	0.00010812	0.000540599	0.000648719	0.000540599	0	0	0	0	0.00010812
USP18	2.32193	0	2.58496	3.58496	2.58496	1	0	0	0	0	4	0	5	11	5	1	0	0	0	0	0.00225225	0	0.00281532	0.00619369	0.00281532	0.000563063	0	0	0	0
VWCE	1	1	4.08746	1.58496	3.32193	1	0	0	0	0	1	1	16	2	9	1	0	0	0	0	4.21567e-05	4.21567e-05	0.000674508	8.43135e-05	0.000379411	4.21567e-05	0	0	0	0
C12orf60	2.58496	2.58496	0	3	3.90689	0	0	1	0	0	5	5	0	7	14	0	0	1	0	0	0.00114129	0.00114129	0	0.00159781	0.00319562	0	0	0.000228258	0	0
DNAH12	1.58496	3	0	2.58496	3.45943	0	0	0	0	0	2	7	0	5	10	0	0	0	0	0	0.000225861	0.000790514	0	0.000564653	0.00112931	0	0	0	0	0
ZNF239	1.58496	2.80735	1	2	4.08746	0	1	0	1	0	2	6	1	3	16	0	1	0	1	0	0.000727008	0.00218103	0.000363504	0.00109051	0.00581607	0	0.000363504	0	0.000363504	0
CYP2C19	2.58496	1	0	2.32193	4.16993	0	0	1	0	0	5	1	0	4	17	0	0	1	0	0	0.00182615	0.00036523	0	0.00146092	0.00620891	0	0	0.00036523	0	0
FHAD1	1	1	0	2.80735	4	0	0	1	0	0	1	1	0	6	15	0	0	1	0	0	5.90912e-05	5.90912e-05	0	0.000354547	0.000886368	0	0	5.90912e-05	0	0
TIMP4	2	2.32193	1	2.58496	4.39232	0	0	1.58496	0	1	3	4	1	5	20	0	0	2	0	1	0.00180723	0.00240964	0.00060241	0.00301205	0.0120482	0	0	0.00120482	0	0.00060241
C11orf86	2.80735	2.32193	0	0	3.45943	0	0	0	0	0	6	4	0	0	10	0	0	0	0	0	0.0030785	0.00205233	0	0	0.00513084	0	0	0	0	0
RAET1G	2.58496	2	0	0	3.58496	0	0	0	0	0	5	3	0	0	11	0	0	0	0	0	0.00125345	0.000752068	0	0	0.00275758	0	0	0	0	0
GCK	2.80735	1.58496	0	0	3	0	0	0	0	0	6	2	0	0	7	0	0	0	0	0	0.00134801	0.000449337	0	0	0.00157268	0	0	0	0	0
RASSF9	2.58496	2.32193	1	1	2	0	0	1	0	0	5	4	1	1	3	0	0	1	0	0	0.00371747	0.00297398	0.000743494	0.000743494	0.00223048	0	0	0.000743494	0	0
PGF	1.58496	2.32193	3.16993	1	1.58496	0	0	1	0	0	2	4	8	1	2	0	0	1	0	0	0.000353607	0.000707214	0.00141443	0.000176803	0.000353607	0	0	0.000176803	0	0
SYNC	1	2	3	1	2	0	0	1	0	0	1	3	7	1	3	0	0	1	0	0	0.000227583	0.000682749	0.00159308	0.000227583	0.000682749	0	0	0.000227583	0	0
KCNQ4	1.58496	2.80735	3	0	1.58496	0	0	1	0	0	2	6	7	0	2	0	0	1	0	0	0.00064	0.00192	0.00224	0	0.00064	0	0	0.00032	0	0
C1orf177	1.58496	2.32193	2.58496	0	3	0	0	0	0	0	2	4	5	0	7	0	0	0	0	0	0.000748223	0.00149645	0.00187056	0	0.00261878	0	0	0	0	0
RPS6KA6	2.80735	3.32193	3.32193	0	2	0	0	1.58496	0	0	6	9	9	0	3	0	0	2	0	0	0.00154281	0.00231422	0.00231422	0	0.000771407	0	0	0.000514271	0	0
TCTE1	1.58496	2.80735	3.32193	2.58496	3	0	0	2.58496	0	0	2	6	9	5	7	0	0	5	0	0	0.000759301	0.0022779	0.00341686	0.00189825	0.00265756	0	0	0.00189825	0	0
LNP1	1	3	3	2.32193	3.45943	0	0	2	0	0	1	7	7	4	10	0	0	3	0	0	0.000340483	0.00238338	0.00238338	0.00136193	0.00340483	0	0	0.00102145	0	0
KCNH8	1	3.32193	4.80735	0	4.16993	0	0	1.58496	0	0	1	9	27	0	17	0	0	2	0	0	5.63603e-05	0.000507242	0.00152173	0	0.000958124	0	0	0.000112721	0	0
PRSS21	0	0	6.44294	1	2.32193	0	0	1	0	0	0	0	86	1	4	0	0	1	0	0	0	0	0.0152347	0.000177148	0.000708592	0	0	0.000177148	0	0
SALL1	3.90689	2.32193	3.16993	0	0	0	0	0	0	0	14	4	8	0	0	0	0	0	0	0	0.0035524	0.00101497	0.00202994	0	0	0	0	0	0	0
GRIN3B	2.32193	3	3.16993	0	0	0	0	0	0	0	4	7	8	0	0	0	0	0	0	0	0.00158604	0.00277557	0.00317209	0	0	0	0	0	0	0
KCNN1	2.32193	1	3.32193	0	1	0	0	0	0	0	4	1	9	0	1	0	0	0	0	0	0.000760167	0.000190042	0.00171038	0	0.000190042	0	0	0	0	0
KCNS1	1.58496	0	3.90689	1.58496	0	0	0	0	0	0	2	0	14	2	0	0	0	0	0	0	0.000532481	0	0.00372737	0.000532481	0	0	0	0	0	0
GATA5	3.32193	3.70044	4.90689	3.70044	2	3.70044	0	1	1	2	9	12	29	12	3	12	0	1	1	3	0.0035503	0.00473373	0.0114398	0.00473373	0.00118343	0.00473373	0	0.000394477	0.000394477	0.00118343
CDHR3	2.80735	2.80735	3.70044	3	2	2.32193	0	1.58496	1	1	6	6	12	7	3	4	0	2	1	1	0.000368981	0.000368981	0.000737962	0.000430478	0.00018449	0.000245987	0	0.000122994	6.14968e-05	6.14968e-05
SLC11A1	2.58496	4.08746	3.90689	3	3.58496	3.45943	2.32193	0	0	1	5	16	14	7	11	10	4	0	0	1	0.000251332	0.000804263	0.00070373	0.000351865	0.000552931	0.000502664	0.000201066	0	0	5.02664e-05
HHIP	2.58496	4.32193	4.16993	1	3.45943	3.32193	0	0	0	0	5	19	17	1	10	9	0	0	0	0	0.000362555	0.00137771	0.00123269	7.25111e-05	0.000725111	0.0006526	0	0	0	0
CNTN1	4.70044	3.45943	4.52356	3	2.80735	0	2	0	1	2.32193	25	10	22	7	6	0	3	0	1	4	0.00238983	0.000955932	0.00210305	0.000669152	0.000573559	0	0.000286779	0	9.55932e-05	0.000382373
CNTNAP2	2.80735	3.16993	3.80735	3.32193	3.32193	0	0	0	0	2.58496	6	8	13	9	9	0	0	0	0	5	0.000771803	0.00102907	0.00167224	0.00115771	0.00115771	0	0	0	0	0.00064317
COL4A1	5.42626	4.08746	3.32193	5.12928	2.80735	2.32193	0	0	0	1.58496	42	16	9	34	6	4	0	0	0	2	0.00594985	0.00226661	0.00127497	0.00481655	0.000849979	0.000566653	0	0	0	0.000283326
SLC6A12	4.70044	3.45943	5.24793	3	1.58496	1	1	1	4.24793	0	25	10	37	7	2	1	1	1	18	0	0.00191131	0.000764526	0.00282875	0.000535168	0.000152905	7.64526e-05	7.64526e-05	7.64526e-05	0.00137615	0
PTGER2	3.16993	3.80735	3.70044	3.45943	0	0	0	0	2.80735	1	8	13	12	10	0	0	0	0	6	1	0.00340716	0.00553663	0.00511073	0.00425894	0	0	0	0	0.00255537	0.000425894
NEURL2	2.32193	3.80735	2.32193	2.58496	2.58496	2.32193	1	0	0	0	4	13	4	5	5	4	1	0	0	0	0.00282686	0.00918728	0.00282686	0.00353357	0.00353357	0.00282686	0.000706714	0	0	0
BRSK2	2.58496	3	2	2	2.32193	1	2	0	0	0	5	7	3	3	4	1	3	0	0	0	0.000273658	0.000383121	0.000164195	0.000164195	0.000218926	5.47315e-05	0.000164195	0	0	0
FBLL1	2	4.52356	0	1.58496	2	0	1	1	0	0	3	22	0	2	3	0	1	1	0	0	0.00266904	0.019573	0	0.00177936	0.00266904	0	0.00088968	0.00088968	0	0
DIO1	2	5.16993	2.32193	2	0	0	1	0	0	0	3	35	4	3	0	0	1	0	0	0	0.000418819	0.00488622	0.000558425	0.000418819	0	0	0.000139606	0	0	0
KLHL14	1	2.58496	2.32193	2	0	0	0	0	0	0	1	5	4	3	0	0	0	0	0	0	0.0001657	0.0008285	0.0006628	0.0004971	0	0	0	0	0	0
SULT4A1	4.70044	1.58496	0	4.24793	0	0	0	0	1	0	25	2	0	18	0	0	0	0	1	0	0.00261178	0.000208943	0	0.00188048	0	0	0	0	0.000104471	0
LUM	5.49185	2.32193	0	2.32193	0	0	0	0	0	0	44	4	0	4	0	0	0	0	0	0	0.0161054	0.00146413	0	0.00146413	0	0	0	0	0	0
UCHL1	3.16993	1	1	3.45943	1	0	0	0	0	1	8	1	1	10	1	0	0	0	0	1	0.000831342	0.000103918	0.000103918	0.00103918	0.000103918	0	0	0	0	0.000103918
PALMD	2.32193	2.32193	1	3.90689	0	0	0	0	0	0	4	4	1	14	0	0	0	0	0	0	0.000946074	0.000946074	0.000236518	0.00331126	0	0	0	0	0	0
CES4A	3.16993	3.80735	2	3.32193	3	1	0	1	0	1	8	13	3	9	7	1	0	1	0	1	0.000608596	0.000988969	0.000228224	0.000684671	0.000532522	7.60746e-05	0	7.60746e-05	0	7.60746e-05
AC022498.1	2.32193	3.32193	1	3.80735	2.58496	0	0	1.58496	0	1	4	9	1	13	5	0	0	2	0	1	0.00177699	0.00399822	0.000444247	0.00577521	0.00222124	0	0	0.000888494	0	0.000444247
CELSR3	3.70044	3.45943	2.32193	2.80735	3.16993	0	0	3.58496	0	1.58496	12	10	4	6	8	0	0	11	0	2	0.00290698	0.00242248	0.000968992	0.00145349	0.00193798	0	0	0.00266473	0	0.000484496
SCUBE2	2.58496	3.58496	4.16993	4.70044	0	1	0	3.32193	0	0	5	11	17	25	0	1	0	9	0	0	0.000433651	0.000954033	0.00147441	0.00216826	0	8.67303e-05	0	0.000780572	0	0
CCDC74A	4.24793	4.24793	4.75489	4.08746	5	0	2	2.32193	0	3.58496	18	18	26	16	31	0	3	4	0	11	0.00165304	0.00165304	0.00238773	0.00146937	0.00284691	0	0.000275507	0.000367343	0	0.00101019
HPDL	4.39232	3.90689	4.70044	3.70044	4.08746	0	1	2	0	3	20	14	25	12	16	0	1	3	0	7	0.0141844	0.00992908	0.0177305	0.00851064	0.0113475	0	0.00070922	0.00212766	0	0.00496454
TM6SF2	3.32193	4.24793	4.52356	2.58496	4.70044	0	2.58496	3	0	3.45943	9	18	22	5	25	0	5	7	0	10	0.00334324	0.00668648	0.00817236	0.00185736	0.00928678	0	0.00185736	0.0026003	0	0.00371471
CYP1A1	3.16993	3.80735	5.88264	2	4.24793	0	1	0	0	5.16993	8	13	58	3	18	0	1	0	0	35	0.000849347	0.00138019	0.00615777	0.000318505	0.00191103	0	0.000106168	0	0	0.00371589
TMEM253	3	3.45943	5.32193	3.70044	4.90689	0	2.32193	1.58496	3.45943	4.08746	7	10	39	12	29	0	4	2	10	16	0.00170732	0.00243902	0.0095122	0.00292683	0.00707317	0	0.00097561	0.000487805	0.00243902	0.00390244
PAH	1.58496	5	5.9542	3.32193	6.53916	2	1	4.08746	3	2.58496	2	31	61	9	92	3	1	16	7	5	0.000119204	0.00184766	0.00363571	0.000536417	0.00548337	0.000178806	5.96019e-05	0.00095363	0.000417213	0.000298009
GKN2	3.90689	7.11894	3.16993	1.58496	7.52356	1.58496	1	3.32193	0	3.32193	14	138	8	2	183	2	1	9	0	9	0.00621118	0.0612245	0.00354925	0.000887311	0.081189	0.000887311	0.000443656	0.0039929	0	0.0039929
HEPH	7.56986	6.53916	8.65821	4.80735	6.2854	0	2.80735	2.58496	1	6.39232	189	92	403	27	77	0	6	5	1	83	0.0230685	0.0112291	0.0491883	0.0032955	0.00939827	0	0.000732332	0.000610277	0.000122055	0.0101306
IL1R2	5.42626	4.32193	6.56986	5.61471	5.42626	4	2.80735	3.90689	2.80735	4.39232	42	19	94	48	42	15	6	14	6	20	0.00561347	0.00253943	0.0125635	0.0064154	0.00561347	0.00200481	0.000801925	0.00187116	0.000801925	0.00267308
GPA33	4.39232	5.24793	6.26679	6	6.18982	2.58496	2.32193	3.58496	2.80735	4.80735	20	37	76	63	72	5	4	11	6	27	0.00324044	0.00599482	0.0123137	0.0102074	0.0116656	0.00081011	0.000648088	0.00178224	0.000972132	0.00437459
CAPN9	5.12928	3.45943	5.67243	5.04439	6.88264	2.80735	3.32193	5.61471	4.16993	2.32193	34	10	50	32	117	6	9	48	17	4	0.0212102	0.0062383	0.0311915	0.0199626	0.0729881	0.00374298	0.00561447	0.0299439	0.0106051	0.00249532
PRODH	4.85798	2.58496	6.80735	6.83289	7.58496	5.16993	1	5.49185	3.70044	4.32193	28	5	111	113	191	35	1	44	12	19	0.0031489	0.000562303	0.0124831	0.0127081	0.02148	0.00393612	0.000112461	0.00494827	0.00134953	0.00213675
FAM211A	5	3.90689	6.2854	4.90689	4.08746	3.70044	0	0	4.52356	3.80735	31	14	77	29	16	12	0	0	22	13	0.00730099	0.00329722	0.0181347	0.00682996	0.00376825	0.00282619	0	0	0.00518135	0.00306171
MMP24	4.70044	3.45943	4.9542	6.65821	2	2	1	3.58496	4.16993	3.45943	25	10	30	100	3	3	1	11	17	10	0.0069735	0.0027894	0.0083682	0.027894	0.00083682	0.00083682	0.00027894	0.00306834	0.00474198	0.0027894
IRF8	2	6.79442	6.04439	4.24793	0	3	2.58496	0	0	1.58496	3	110	65	18	0	7	5	0	0	2	0.00028177	0.0103315	0.00610501	0.00169062	0	0.000657462	0.000469616	0	0	0.000187846
SLC6A19	0	4.08746	7.52356	5.61471	2	1	2	0	0	0	0	16	183	48	3	1	3	0	0	0	0	0.0017288	0.0197731	0.00518639	0.000324149	0.00010805	0.000324149	0	0	0
MUC6	0	7.42626	8.71768	4.9542	0	4.32193	0	2.32193	2	0	0	171	420	30	0	19	0	4	3	0	0	0.0397952	0.0977426	0.00698162	0	0.00442169	0	0.000930882	0.000698162	0
SYNE1	3.16993	1	3	1	0	5.20945	3.16993	3	3.58496	2.80735	8	1	7	1	0	36	8	7	11	6	0.000220119	2.75149e-05	0.000192604	2.75149e-05	0	0.000990535	0.000220119	0.000192604	0.000302663	0.000165089
ZIK1	2	1.58496	2	0	0	4.08746	2.58496	2.80735	5.35755	3.16993	3	2	3	0	0	16	5	6	40	8	0.000490838	0.000327225	0.000490838	0	0	0.0026178	0.000818063	0.000981675	0.0065445	0.0013089
IL2RG	1	2.58496	3.32193	0	1.58496	5.20945	3.58496	3.16993	2.80735	2.58496	1	5	9	0	2	36	11	8	6	5	0.000157604	0.000788022	0.00141844	0	0.000315209	0.00567376	0.00173365	0.00126084	0.000945626	0.000788022
IFITM1	2.32193	1.58496	0	0	0	5.49185	2.32193	3	4.9542	1	4	2	0	0	0	44	4	7	30	1	0.00265604	0.00132802	0	0	0	0.0292165	0.00265604	0.00464807	0.0199203	0.000664011
GNA15	1	2.32193	0	0	1	4	2	4.39232	3.45943	2.32193	1	4	0	0	1	15	3	20	10	4	0.000125534	0.000502134	0	0	0.000125534	0.001883	0.000376601	0.00251067	0.00125534	0.000502134
CCNA1	0	0	1	1	0	6.08746	3.32193	4.24793	3.45943	1.58496	0	0	1	1	0	67	9	18	10	2	0	0	0.000383289	0.000383289	0	0.0256803	0.0034496	0.0068992	0.00383289	0.000766577
ICAM1	2	1	0	0	3.80735	5.97728	4.08746	3.16993	3.16993	3.32193	3	1	0	0	13	62	16	8	8	9	0.000590203	0.000196734	0	0	0.00255754	0.0121975	0.00314775	0.00157387	0.00157387	0.00177061
C21orf67	2	0	0	0	1.58496	4.85798	2	3.32193	0	3.16993	3	0	0	0	2	28	3	9	0	8	0.000591133	0	0	0	0.000394089	0.00551724	0.000591133	0.0017734	0	0.00157635
C6orf100	2.58496	1	0	1.58496	1	4.08746	4.52356	1.58496	3	1.58496	5	1	0	2	1	16	22	2	7	2	0.00345781	0.000691563	0	0.00138313	0.000691563	0.011065	0.0152144	0.00138313	0.00484094	0.00138313
CDH5	0	0	0	0	0	5.49185	3.90689	0	3.16993	2.32193	0	0	0	0	0	44	14	0	8	4	0	0	0	0	0	0.0030069	0.000956742	0	0.000546709	0.000273355
SLC16A14	1.58496	0	0	0	1.58496	4.90689	2	3	3	0	2	0	0	0	2	29	3	7	7	0	0.000329435	0	0	0	0.000329435	0.00477681	0.000494153	0.00115302	0.00115302	0
NKAPL	1	0	0	0	2	3.90689	1	3.32193	3	1.58496	1	0	0	0	3	14	1	9	7	2	0.000726216	0	0	0	0.00217865	0.010167	0.000726216	0.00653595	0.00508351	0.00145243
RP11-297N6.4	0	1	0	0	0	3.70044	0	1.58496	3.90689	1	0	1	0	0	0	12	0	2	14	1	0	0.000399521	0	0	0	0.00479425	0	0.000799041	0.00559329	0.000399521
AKT3	0	0	0	0	0	3	0	1	4.16993	0	0	0	0	0	0	7	0	1	17	0	0	0	0	0	0	0.000483025	0	6.90036e-05	0.00117306	0
CALCB	0	0	0	0	0	4.32193	1	0	2.80735	1	0	0	0	0	0	19	1	0	6	1	0	0	0	0	0	0.00342527	0.000180278	0	0.00108167	0.000180278
S100A9	0	0	0	0	0	5	2.32193	1	1	0	0	0	0	0	0	31	4	1	1	0	0	0	0	0	0	0.0223827	0.00288809	0.000722022	0.000722022	0
GATA2	0	0	0	0	0	2.58496	2	1.58496	1	0	0	0	0	0	0	5	3	2	1	0	0	0	0	0	0	0.000965251	0.000579151	0.0003861	0.00019305	0
SYT5	1	1	0	1	0	2.80735	2	2.58496	2	2.32193	1	1	0	1	0	6	3	5	3	4	0.000131718	0.000131718	0	0.000131718	0	0.000790306	0.000395153	0.000658588	0.000395153	0.00052687
LRRC48	1	0	0	0	0	1	2	1.58496	3.16993	2	1	0	0	0	0	1	3	2	8	3	5.47256e-05	0	0	0	0	5.47256e-05	0.000164177	0.000109451	0.000437804	0.000164177
HLA-DRA	0	2	0	0	0	4.16993	0	2.80735	5.49185	0	0	3	0	0	0	17	0	6	44	0	0	0.0011534	0	0	0	0.00653595	0	0.00230681	0.0169166	0
CDKL1	1.58496	2.32193	1	2.32193	1	3.80735	3.32193	2	3.58496	4.08746	2	4	1	4	1	13	9	3	11	16	0.000204019	0.000408038	0.00010201	0.000408038	0.00010201	0.00132612	0.000918086	0.000306029	0.00112211	0.00163215
MT1G	0	3	0	2.32193	1.58496	3.45943	2.58496	2.32193	4.58496	4.16993	0	7	0	4	2	10	5	4	23	17	0	0.00420673	0	0.00240385	0.00120192	0.00600962	0.00300481	0.00240385	0.0138221	0.0102163
SOX8	1.58496	3.45943	0	1	1.58496	2	2.80735	5	5.35755	3.80735	2	10	0	1	2	3	6	31	40	13	0.000717103	0.00358551	0	0.000358551	0.000717103	0.00107565	0.00215131	0.0111151	0.0143421	0.00466117
GABRB3	2	3.45943	1	0	3.90689	3.32193	5.32193	1	4.9542	6.06609	3	10	1	0	14	9	39	1	30	66	0.000167645	0.000558815	5.58815e-05	0	0.000782341	0.000502934	0.00217938	5.58815e-05	0.00167645	0.00368818
DHRS2	1	1.58496	2	0	3.70044	0	4.24793	3.58496	5.12928	6.40939	1	2	3	0	12	0	18	11	34	84	0.0002331	0.0004662	0.000699301	0	0.0027972	0	0.0041958	0.0025641	0.00792541	0.0195804
ST8SIA6	0	0	0	1.58496	1	0	4.39232	3.80735	4.45943	3	0	0	0	2	1	0	20	13	21	7	0	0	0	0.000539374	0.000269687	0	0.00539374	0.00350593	0.00566343	0.00188781
ZFP57	0	0	0	0	0	0	4.9542	3.45943	5.83289	2.32193	0	0	0	0	0	0	30	10	56	4	0	0	0	0	0	0	0.0230061	0.00766871	0.0429448	0.00306748
SERPINB2	2.32193	1	0	2.58496	4	5.72792	3.32193	1	0	7.39232	4	1	0	5	15	52	9	1	0	167	0.000737191	0.000184298	0	0.000921489	0.00276447	0.00958349	0.00165868	0.000184298	0	0.0307777
CORO1A	2.58496	0	0	3.90689	2.58496	8.31288	4.85798	4.9542	5.24793	5.52356	5	0	0	14	5	317	28	30	37	45	0.000504592	0	0	0.00141286	0.000504592	0.0319911	0.00282571	0.00302755	0.00373398	0.00454133
TMEM173	4.08746	0	0	1.58496	2	6.45943	5.45943	5.16993	5.12928	4.16993	16	0	0	2	3	87	43	35	34	17	0.0017494	0	0	0.000218675	0.000328012	0.00951236	0.00470151	0.00382681	0.00371747	0.00185874
MLF1	3.45943	1	2	3.32193	2	5.83289	3.32193	5.45943	5.67243	5.55459	10	1	3	9	3	56	9	43	50	46	0.00102902	0.000102902	0.000308705	0.000926116	0.000308705	0.0057625	0.000926116	0.00442478	0.00514509	0.00473348
FLI1	0	1.58496	0	4.16993	3.45943	4.80735	5.85798	4.32193	4.32193	4.9542	0	2	0	17	10	27	57	19	19	30	0	0.000154202	0	0.00131072	0.00077101	0.00208173	0.00439476	0.00146492	0.00146492	0.00231303
DUSP10	4.08746	1.58496	0	2	1.58496	5.20945	4.39232	4.08746	2.32193	4.08746	16	2	0	3	2	36	20	16	4	16	0.00727603	0.000909504	0	0.00136426	0.000909504	0.0163711	0.00909504	0.00727603	0.00181901	0.00727603
ADAMTS14	3.32193	1	0	2.58496	1	5.42626	3.90689	4.08746	4	3.70044	9	1	0	5	1	42	14	16	15	12	0.00323276	0.000359195	0	0.00179598	0.000359195	0.0150862	0.00502874	0.00574713	0.00538793	0.00431034
CPE	3.80735	0	0	1	0	3.80735	3.80735	4.90689	2	3.45943	13	0	0	1	0	13	13	29	3	10	0.00230906	0	0	0.00017762	0	0.00230906	0.00230906	0.00515098	0.00053286	0.0017762
IQCG	3	1	0	3	2	2.58496	3.58496	4.64386	3.90689	4.32193	7	1	0	7	3	5	11	24	14	19	0.000686746	9.81065e-05	0	0.000686746	0.00029432	0.000490533	0.00107917	0.00235456	0.00137349	0.00186402
TCF15	2.58496	1	3.32193	2	2.58496	4.90689	4.39232	4.58496	2	6.14975	5	1	9	3	5	29	20	23	3	70	0.00251256	0.000502513	0.00452261	0.00150754	0.00251256	0.0145729	0.0100503	0.0115578	0.00150754	0.0351759
DCLK1	1.58496	3	1	3.32193	2.32193	7.22882	4.08746	3.70044	2.80735	3.32193	2	7	1	9	4	149	16	12	6	9	0.000198452	0.000694582	9.9226e-05	0.000893034	0.000396904	0.0147847	0.00158762	0.00119071	0.000595356	0.000893034
CELF2	0	3.16993	0	1.58496	2	7.15987	3.58496	4.9542	2.80735	1.58496	0	8	0	2	3	142	11	30	6	2	0	0.000446304	0	0.000111576	0.000167364	0.0079219	0.000613668	0.00167364	0.000334728	0.000111576
IGFL1	2.80735	2.58496	2.32193	2.80735	0	6.52356	3.90689	3.90689	4.90689	0	6	5	4	6	0	91	14	14	29	0	0.00372902	0.00310752	0.00248602	0.00372902	0	0.0565569	0.00870106	0.00870106	0.0180236	0
FOSB	2.80735	3.80735	0	1	1.58496	5.67243	6.89482	8.98584	0	0	6	13	0	1	2	50	118	506	0	0	0.000861698	0.00186701	0	0.000143616	0.000287233	0.00718081	0.0169467	0.0726698	0	0
HLA-DQB1	5.12928	1	0	0	5.88264	0	0	8.8392	7.97728	6.33985	34	1	0	0	58	0	0	457	251	80	0.00814371	0.000239521	0	0	0.0138922	0	0	0.109461	0.0601198	0.0191617
AC174470.1	7.37504	6.71425	7.73471	7.45121	6.83289	10.1824	7.69349	7.84549	9.09011	9.18735	165	104	212	174	113	1161	206	229	544	582	0.0240735	0.0151736	0.0309308	0.0253866	0.0164867	0.16939	0.0300554	0.0334111	0.0793697	0.0849139
FAM195B	7.37504	6.6865	7.65821	7.39232	6.83289	10.1787	7.57743	7.8392	9.07146	9.17243	165	102	201	167	113	1158	190	228	537	576	0.053243	0.0329138	0.0648596	0.0538884	0.0364634	0.373669	0.0613101	0.0735721	0.173282	0.185866
CDKN2A	7.29462	6.87036	8.43045	8.05528	8.11374	10.388	7.54689	7.27612	9.28309	9.33539	156	116	344	265	276	1339	186	154	622	645	0.0134727	0.0100181	0.029709	0.0228863	0.0238363	0.11564	0.0160636	0.0132999	0.0537179	0.0557043
HYAL2	8.33985	8.11894	8.8857	7.90689	8.11374	10.9701	7.9542	8.64746	8.93958	9.3015	323	277	472	239	276	2005	247	400	490	630	0.0778876	0.0667953	0.113817	0.057632	0.0665541	0.483482	0.0595611	0.0964553	0.118158	0.151917
KRT16	8.18488	8.17493	7.7879	8.633	8.29921	10.2444	7.15987	9.21432	8.97441	9.46964	290	288	220	396	314	1212	142	593	502	708	0.0586926	0.0582878	0.0445254	0.0801457	0.0635499	0.245294	0.0287391	0.120016	0.101599	0.143291
SH3BP5L	7.47573	7.42626	7.19967	6.98868	9.52552	10.1046	7.30378	9.04439	7.7879	10.0808	177	171	146	126	736	1100	157	527	220	1082	0.0460578	0.0444965	0.0379912	0.0327869	0.191517	0.286235	0.0408535	0.137132	0.0572469	0.281551
PRMT1	7.60733	7.35755	7.83289	6.75489	8.60363	10.0126	7.33092	7.98868	8.33092	9.16491	194	163	227	107	388	1032	160	253	321	573	0.0152133	0.0127823	0.0178011	0.00839084	0.0304266	0.0809285	0.0125471	0.01984	0.0251725	0.0449341
CTD-3214H19.16	7.65105	7.71425	8.36194	7.52356	7.45943	9.2384	8.34873	8.14466	9.5812	8.74819	200	209	328	183	175	603	325	282	765	429	0.128123	0.133889	0.210122	0.117233	0.112108	0.386291	0.2082	0.180653	0.49007	0.274824
TRAPPC5	7.65105	7.71425	8.36194	7.52356	7.45943	9.2384	8.34873	8.14466	9.5812	8.74819	200	209	328	183	175	603	325	282	765	429	0.162075	0.169368	0.265802	0.148298	0.141815	0.488655	0.263371	0.228525	0.619935	0.34765
DPCD	7.96578	7.92481	7.83289	7.89482	7.55459	8.8392	8.31288	8.31741	10.7928	7.96	249	242	227	237	187	457	317	318	1773	248	0.0459749	0.0446824	0.0419129	0.0437592	0.0345273	0.0843796	0.0585303	0.0587149	0.327363	0.0457903
C8orf59	7.01123	7.47573	7.10852	7.82018	8.07682	8.72451	7.9542	7.40939	10.0417	8.25267	128	177	137	225	269	422	247	169	1053	304	0.0193237	0.026721	0.0206824	0.0339674	0.0406099	0.0637077	0.0372886	0.0255133	0.158967	0.0458937
APLP1	8.08746	7.04439	8.56986	6.79442	7.7879	9.15987	8.35755	9.41574	9.31288	7.80735	271	131	379	110	220	571	327	682	635	223	0.0186408	0.00901087	0.0260696	0.00756638	0.0151328	0.0392764	0.0224928	0.0469115	0.0436786	0.0153391
MT2A	6.47573	6.52356	7.62205	7.01123	5.70044	9.94251	8.7211	9.06609	9.98014	8.22882	88	91	196	128	51	983	421	535	1009	299	0.0583554	0.0603448	0.129973	0.0848806	0.0338196	0.651857	0.279178	0.354775	0.669098	0.198276
SERTAD1	7.34873	6.91886	6.91886	6.75489	7.09803	8.12928	8.00562	7.97728	8.2384	8.37069	162	120	120	107	136	279	256	251	301	330	0.0663934	0.0491803	0.0491803	0.0438525	0.0557377	0.114344	0.104918	0.102869	0.123361	0.135246
MGMT	6.33985	6.87036	6.26679	7.07682	7.17991	8.6865	7.29462	7.53138	8.58871	7.55459	80	116	76	134	144	411	156	184	384	187	0.0138074	0.0200207	0.013117	0.0231274	0.0248533	0.0709355	0.0269244	0.031757	0.0662755	0.0322748
GALK1	5.52356	7.33985	7.15987	6.6865	7.53138	8.29462	8.09803	8.16491	8.13955	8.14466	45	161	142	102	184	313	273	286	281	282	0.00648602	0.0232055	0.020467	0.0147016	0.0265206	0.0451139	0.0393485	0.0412223	0.0405016	0.0406457
ZG16B	6.37504	7.45121	7.49185	6.37504	6.26679	9.00843	8.03342	7.26679	8.7879	6.61471	82	174	179	82	76	514	261	153	441	97	0.0169667	0.0360025	0.037037	0.0169667	0.0157252	0.106352	0.0540037	0.0316574	0.0912477	0.0200703
OAZ2	6.93074	6.33985	6.55459	6.71425	7.79442	9.36194	7	7.03342	7.15987	8.6865	121	80	93	104	221	657	127	130	142	411	0.02	0.0132231	0.0153719	0.0171901	0.0365289	0.108595	0.0209917	0.0214876	0.0234711	0.0679339
CCDC124	6.32193	6.16993	6.61471	5.93074	7.40939	9.09803	6	7.06609	7.13955	8.38802	79	71	97	60	169	547	63	133	140	334	0.0204451	0.0183747	0.0251035	0.015528	0.0437371	0.141563	0.0163043	0.0344203	0.0362319	0.0864389
TSSC4	6.78136	6.45943	7.54689	6.79442	7.84549	9.36194	6.47573	6.94251	8.5157	8.93074	109	87	186	110	229	657	88	122	365	487	0.0268539	0.0214339	0.0458241	0.0271003	0.0564178	0.161863	0.0216802	0.0300567	0.0899236	0.11998
STMN2	7.01123	5.58496	3.80735	6.82018	5.08746	9.25974	8.54303	10.0403	9.98014	9.76155	128	47	13	112	33	612	372	1052	1009	867	0.0500978	0.0183953	0.00508806	0.0438356	0.0129159	0.23953	0.145597	0.411742	0.394912	0.339335
APOL1	8.75154	8.31741	8.92778	9.01123	9.85175	9.78627	10.4242	10.8842	10.3696	9.86882	430	318	486	515	923	882	1373	1889	1322	934	0.0550858	0.0407379	0.0622598	0.0659749	0.118242	0.11299	0.17589	0.241993	0.169357	0.119652
JUN	8.22882	8.99435	8.98584	9.07682	8.89482	9.7364	9.44915	11.3971	8.69697	9.02514	299	509	506	539	475	852	698	2696	414	520	0.131083	0.223148	0.221833	0.2363	0.208242	0.37352	0.306006	1.18194	0.181499	0.22797
IFITM2	9.21432	7.53138	10.2408	7.8009	8.35315	10.8796	9.87652	10.5507	10.3498	8.56605	593	184	1209	222	326	1883	939	1499	1304	378	0.147512	0.0457711	0.300746	0.0552239	0.0810945	0.468408	0.233582	0.372886	0.324378	0.0940299
TSPAN13	8.45533	9.03342	8.35755	8.83289	9.28771	9.29002	9.95565	8.53916	11.8887	9.02514	350	523	327	455	624	625	992	371	3791	520	0.101833	0.152168	0.0951411	0.132383	0.181554	0.181845	0.288624	0.107943	1.103	0.151295
RNASET2	8.82018	8.17493	8.39232	7.8009	8.53138	9.82337	10.3509	9.62022	9.75822	7.36632	451	288	335	222	369	905	1305	786	865	164	0.045551	0.029088	0.033835	0.022422	0.037269	0.0914049	0.131805	0.0793859	0.0873649	0.016564
EGR1	8.54303	8.27612	7.87036	8.55459	8.01681	7.94251	10.1059	10.9121	8.84235	7.45943	372	309	233	375	258	245	1101	1926	458	175	0.153086	0.12716	0.0958848	0.154321	0.106173	0.100823	0.453086	0.792593	0.188477	0.0720165
SDF2L1	8.31741	7.85175	8.40939	8.87958	9.58496	10.4969	8.14975	8.69349	9.02237	11.6475	318	230	339	470	767	1444	283	413	519	3207	0.126441	0.0914513	0.134791	0.186879	0.30497	0.574155	0.112525	0.164215	0.206362	1.27515
U2AF2	7.77479	8.03342	8.54689	7.8392	10.2082	11.2917	7.83289	8.85487	8.54303	11.1344	218	261	373	228	1182	2506	227	462	372	2247	0.0137418	0.0164523	0.0235124	0.0143722	0.0745083	0.157968	0.0143091	0.0291225	0.0234493	0.141641
HNRNPA0	9.13699	9.08746	9.37504	8.87652	9.70044	9.80574	8.96	9.26444	8.98299	13.9131	562	543	663	469	831	894	497	614	505	15425	0.203476	0.196597	0.240043	0.169804	0.300869	0.323678	0.179942	0.222303	0.182839	5.58472
SLC7A7	9.16491	8.70736	9.33985	9.22641	8.92778	5.70044	7.79442	8.52748	6.33985	8.64746	573	417	647	598	486	51	221	368	80	400	0.0717595	0.0522229	0.0810269	0.0748904	0.0608641	0.00638698	0.0276769	0.0460864	0.0100188	0.0500939
B3GALT5	9.72281	8.60363	8.83605	8.65105	9.11634	5.55459	8.33539	7.53916	6.78136	8.81057	844	388	456	401	554	46	322	185	109	448	0.0601268	0.0276412	0.0324856	0.0285674	0.0394671	0.00327705	0.0229394	0.0131795	0.00776519	0.0319157
LOXL4	9.80896	8.62571	9.45943	9.94105	7.67243	7.67948	8.5812	8.30834	8.33539	8.29462	896	394	703	982	203	204	382	316	322	313	0.36918	0.16234	0.289658	0.404615	0.0836424	0.0840544	0.157396	0.130202	0.132674	0.128966
FKBP11	9.31515	9.43671	9.12928	8.48784	8.23362	7.92481	7.39232	7.7211	7.96	7.53138	636	692	559	358	300	242	167	210	248	184	0.0769045	0.0836759	0.0675937	0.043289	0.0362757	0.0292624	0.0201935	0.025393	0.0299879	0.0222491
ANO1	8.85487	9.21432	9.1472	8.82337	8.63662	7.63662	7.34873	7.82018	7.55459	7.88874	462	593	566	452	397	198	162	225	187	236	0.0462926	0.0594188	0.0567134	0.0452906	0.0397796	0.0198397	0.0162325	0.0225451	0.0187375	0.0236473
S100A4	9.21432	9.23601	9.17742	7.62205	8.70736	8.36632	6.79442	7.12928	7.40939	8.13955	593	602	578	196	417	329	110	139	169	281	0.441878	0.448584	0.4307	0.146051	0.31073	0.245156	0.0819672	0.103577	0.125931	0.209389
CAPN8	8.52356	9.73132	8.94544	8.88264	8.92481	6.44294	8.73132	7.7211	7.59991	6.89482	367	849	492	471	485	86	424	210	193	118	0.0201992	0.0467279	0.0270791	0.0259233	0.0266938	0.00473334	0.0233365	0.0115581	0.0106225	0.00649458
IMPA2	7.75489	8.54689	8.98868	8.29462	8.77808	6.10852	7.79442	7.20945	7.5157	7.44294	215	373	507	313	438	68	221	147	182	173	0.0164751	0.0285824	0.0388506	0.0239847	0.0335632	0.00521073	0.0169349	0.0112644	0.0139464	0.0132567
CA12	7.67243	9.33762	8.92481	7.75489	7.69349	7.37504	7.27612	7.70044	7.98299	6.37504	203	646	485	215	206	165	154	207	252	82	0.0238964	0.0760447	0.0570924	0.025309	0.0242496	0.0194232	0.0181283	0.0243673	0.0296645	0.00965274
SLC43A1	6.44294	8.45533	8.51964	9.03342	8.92481	6.40939	7.61471	8.25739	6.93074	6.74147	86	350	366	523	485	84	195	305	121	106	0.0066476	0.0270542	0.0282909	0.0404267	0.0374894	0.006493	0.015073	0.0235758	0.00935302	0.00819355
ACSS1	7.98868	8.75489	8.24793	7.82018	8.5157	6.04439	7.78136	6.16993	6.83289	6.02237	253	431	303	225	365	65	219	71	113	64	0.0524244	0.0893079	0.0627849	0.0466225	0.075632	0.0134687	0.0453792	0.014712	0.0234148	0.0132615
C2orf72	8.81378	7.83289	8.67243	7.89482	6.75489	5.32193	7.71425	7.06609	6.70044	6.58496	449	227	407	237	107	39	209	133	103	95	0.115306	0.0582948	0.10452	0.0608629	0.0274782	0.0100154	0.0536723	0.0341551	0.026451	0.0243965
SYT8	8.16993	9.43045	9.98014	7.20945	8.82972	7.33092	6.40939	5.08746	9.15482	7.08746	287	689	1009	147	454	160	84	33	569	135	0.0423179	0.101592	0.148776	0.021675	0.0669419	0.0235919	0.0123857	0.00486582	0.0838986	0.0199056
MYEOV	9.54689	7.79442	9.43879	8.93664	7.93664	7.03342	7.30378	3.80735	6.78136	8.68299	747	221	693	489	244	130	157	13	109	410	0.0789641	0.0233615	0.0732558	0.0516913	0.0257928	0.0137421	0.0165962	0.00137421	0.0115222	0.0433404
TSKU	7.2854	7.60733	7.52356	7.22882	8.16491	6.37504	6.35755	7.14975	5.9542	6.75489	155	194	183	149	286	82	81	141	61	107	0.0387113	0.0484515	0.0457043	0.0372128	0.0714286	0.0204795	0.0202298	0.0352148	0.0152348	0.0267233
AUTS2	6.93074	7.97154	7.59246	7.56224	8.13955	5.90689	6.26679	7	6.47573	6.45943	121	250	192	188	281	59	76	127	88	87	0.00636809	0.0131572	0.0101047	0.00989422	0.0147887	0.0031051	0.00399979	0.00668386	0.00463134	0.00457871
AC073610.5	7.69349	7.73471	7.6865	6.9542	6.79442	6.40939	5.80735	6.47573	6.62936	6.02237	206	212	205	123	110	84	55	88	98	64	0.147989	0.152299	0.14727	0.0883621	0.079023	0.0603448	0.0395115	0.0632184	0.0704023	0.045977
ETV4	6.32193	6.87036	8.63662	7.02237	7.37504	6.88264	6.82018	6.18982	5.80735	6.04439	79	116	397	129	165	117	112	72	55	65	0.0118708	0.0174305	0.0596544	0.0193839	0.0247934	0.0175808	0.0168295	0.0108189	0.00826446	0.00976709
FAM198B	7.33092	5.78136	6.47573	6.44294	7.93664	6.12928	6.32193	5.45943	6.04439	5.67243	160	54	88	86	244	69	79	43	65	50	0.0161698	0.0054573	0.00889338	0.00869126	0.0246589	0.00697322	0.00798383	0.00434563	0.00656897	0.00505306
WSCD1	6.82018	7.30378	7.71425	8.47168	7.27612	5.58496	6.52356	5.97728	6.62936	6.94251	112	157	209	354	154	47	91	62	98	122	0.0074597	0.0104569	0.0139203	0.023578	0.0102571	0.00313041	0.00606101	0.00412948	0.00652724	0.00812575
SIRPA	7.87652	6.39232	7	9.03892	6.40939	5.42626	6.65821	5.42626	6.62936	6.32193	234	83	127	525	84	42	100	42	98	79	0.066383	0.0235461	0.0360284	0.148936	0.0238298	0.0119149	0.0283688	0.0119149	0.0278014	0.0224113
MYLK	8.68299	6.94251	7.08746	8.44294	5.97728	6.85798	6.06609	7.08746	6.06609	6.37504	410	122	135	347	62	115	66	135	66	82	0.00881228	0.00262219	0.0029016	0.0074582	0.00133259	0.00247174	0.00141856	0.0029016	0.00141856	0.00176246
TM4SF5	8.52748	7.85175	8.5157	8.84235	8.56605	6.16993	7.01123	7.39232	5.39232	7.43463	368	230	365	458	378	71	128	167	41	172	0.287725	0.179828	0.285379	0.358092	0.295543	0.0555121	0.100078	0.130571	0.0320563	0.13448
SLCO2B1	8.65105	7.85798	8.78136	7.65821	8.09803	5.75489	7.37504	5.75489	3.90689	7.94837	401	231	439	201	273	53	165	53	14	246	0.0297831	0.0171569	0.0326055	0.0149287	0.0202763	0.00393642	0.0122549	0.00393642	0.00103981	0.0182709
AMN	7.09803	8.08746	7.49185	7.84549	8.09803	4.9542	7.06609	7.11894	5.20945	5.85798	136	271	179	229	273	30	133	138	36	57	0.032466	0.0646932	0.042731	0.054667	0.0651707	0.00716161	0.0317498	0.0329434	0.00859394	0.0136071
KLF2	7.2854	7.57743	6.89482	7.04439	8.61839	5.24793	6.40939	7.62205	3.58496	7.17991	155	190	118	131	392	37	84	196	11	144	0.0754993	0.0925475	0.0574769	0.0638091	0.19094	0.0180224	0.0409157	0.09547	0.00535801	0.0701413
LGALS1	7.20945	9.47371	8.2854	8.71425	7.29462	7.07682	8.82655	7.44294	5.72792	2.80735	147	710	311	419	156	134	453	173	52	6	0.024619	0.118908	0.0520851	0.0701725	0.0261263	0.0224418	0.0758667	0.0289734	0.00870876	0.00100486
NDRG4	10.9016	5.24793	7.67948	8.62936	5.24793	5.67243	8.05528	6.74147	6.47573	6.6865	1912	37	204	395	37	50	265	106	88	102	0.0874177	0.00169166	0.00932699	0.0180596	0.00169166	0.00228603	0.0121159	0.00484638	0.00402341	0.0046635
CNOT1	8.78463	9.04166	9.24793	13.5894	9.53722	8.04439	9.0954	9.31967	8.43045	9.25974	440	526	607	12325	742	263	546	638	344	612	0.0154067	0.018418	0.0212542	0.431563	0.0259813	0.00920901	0.0191183	0.0223397	0.0120452	0.0214293
AKR1B10	7.85175	9.53528	9.76818	10.4019	11.1053	7	8.22882	7.61471	7.26679	9.3015	230	741	871	1352	2202	127	299	195	153	630	0.0848395	0.273331	0.321284	0.498709	0.812246	0.0468462	0.110291	0.0719292	0.0564367	0.232387
GSTM4	9.92333	11.1818	10.6221	10.3072	9.55075	8.18488	9.67772	9.01681	7.37504	7.67948	970	2322	1575	1266	749	290	818	517	165	204	0.125113	0.299497	0.203147	0.163292	0.0966078	0.0374049	0.105508	0.0666839	0.0212821	0.0263124
CEACAM5	10.2866	10.4757	11.2715	8.59991	11.1911	4.80735	7.63662	8.96	6.82018	9.28771	1248	1423	2471	387	2337	27	198	497	112	624	0.163565	0.186501	0.323853	0.0507208	0.306291	0.00353866	0.0259502	0.0651376	0.0146789	0.0817824
UGT1A1	10.8978	10.599	8.30834	9.60733	9.67243	4.32193	8.15987	6.16993	6.52356	8.9571	1907	1550	316	779	815	19	285	71	91	496	0.985021	0.80062	0.163223	0.402376	0.420971	0.00981405	0.147211	0.0366736	0.0470041	0.256198
ALDH3A1	7.09803	12.0196	10.66	7.47573	12.8644	7.97728	7.2854	7.10852	8.25267	9.68124	136	4151	1617	177	7456	251	155	137	304	820	0.0120986	0.369273	0.143848	0.0157459	0.663286	0.022329	0.0137888	0.0121875	0.0270439	0.0729472
PCK1	7.75489	11.5221	10.2252	7.65105	11.0855	7.29462	10.2479	7.70044	7.12928	6.30378	215	2940	1196	200	2172	156	1215	207	139	78	0.0277205	0.379061	0.154203	0.0257865	0.280041	0.0201135	0.156653	0.026689	0.0179216	0.0100567
DPCR1	8.47168	10.8903	7.12928	7.97154	11.0189	6.78136	4.52356	7	4.24793	8.93074	354	1897	139	250	2074	109	22	127	18	487	0.153913	0.824783	0.0604348	0.108696	0.901739	0.0473913	0.00956522	0.0552174	0.00782609	0.211739
PSCA	9.43879	11.9833	6.80735	7.27612	6.79442	4.39232	6.56986	10.2408	6.18982	6.61471	693	4048	111	154	110	20	94	1209	72	97	0.201805	1.1788	0.0323238	0.0448457	0.0320326	0.00582411	0.0273733	0.352068	0.0209668	0.0282469
RPS5	10.6751	10.8439	11.6055	10.66	11.3977	13.2011	11.4909	11.4252	12.703	12.5127	1634	1837	3115	1617	2697	9416	2877	2749	6667	5843	0.446692	0.502187	0.851558	0.442045	0.737288	2.57408	0.786495	0.751504	1.82258	1.59732
RPL18A	9.94398	10.4888	11.1855	10.3597	10.7541	11.5641	10.8242	12.2929	11.8622	11.1762	984	1436	2328	1313	1726	3027	1812	5017	3722	2313	0.218764	0.319253	0.517563	0.291908	0.383726	0.672966	0.402846	1.11538	0.827479	0.514229
ADAM15	9.52943	9.62022	10.1472	9.16491	11.5127	12.8709	10.1306	11.4414	10.3674	11.5637	738	786	1133	573	2921	7490	1120	2780	1320	3026	0.0616799	0.0656916	0.0946929	0.0478897	0.244129	0.625992	0.0936064	0.232344	0.110322	0.252904
KLK10	12.1418	10.9388	9.13443	8.96578	11.5579	13.3421	9.82337	12.6309	12.4359	11.0314	4518	1962	561	499	3014	10383	905	6342	5540	2092	0.762146	0.330972	0.0946356	0.0841768	0.508435	1.75152	0.152665	1.06984	0.934548	0.352901
RPL6	9.8392	9.6987	9.69349	9.85953	9.79116	10.1774	10.2923	12.3559	10.2276	10.3912	915	830	827	928	885	1157	1253	5241	1198	1342	0.145123	0.131642	0.131166	0.147185	0.140365	0.183505	0.198731	0.831245	0.190008	0.212847
SPINK1	9.51964	9.40088	8.20457	9.30606	11.1241	9.27845	11.4752	12.2709	11.2527	10.3432	733	675	294	632	2231	620	2846	4941	2439	1298	0.214516	0.197542	0.0860404	0.184958	0.652912	0.181446	0.832894	1.44601	0.713784	0.379865
SLC2A3	10.4564	8.80413	9.72622	10.2204	8.27146	11.668	11.3123	10.9737	10.2808	11.0505	1404	446	846	1192	308	3253	2542	2010	1243	2120	0.117244	0.0372443	0.0706472	0.0995407	0.0257203	0.271649	0.212276	0.16785	0.1038	0.177035
TIMP2	12.1193	9.80252	11.0119	10.8098	9.21432	10.0362	10.1586	9.91139	9.5157	9.97871	4448	892	2064	1794	593	1049	1142	962	731	1008	0.679603	0.136287	0.315355	0.274102	0.0906035	0.160275	0.174484	0.146982	0.111688	0.154011
SPINK4	11.2161	11.1655	12.1453	10.4767	10.1059	8.5812	7.92481	9.84078	10.4221	10.341	2378	2296	4529	1424	1101	382	242	916	1371	1296	1.84056	1.77709	3.50542	1.10217	0.852167	0.295666	0.187307	0.708978	1.06115	1.0031
MUC5AC	10.9099	11.6613	12.8994	12.1824	12.8388	10.7952	8.22882	11.1261	9.99718	9.51175	1923	3238	7639	4647	7325	1776	299	2234	1021	729	0.803594	1.35311	3.19223	1.94191	3.06101	0.742165	0.124948	0.933556	0.426661	0.304639
MMP1	12.3143	14.0423	13.2818	13.2677	12.9553	9.40514	11.8711	11.4558	13.4765	12.5267	5092	16870	9958	9861	7941	677	3745	2808	11397	5900	3.01659	9.99408	5.89929	5.84182	4.70438	0.401066	2.2186	1.66351	6.75178	3.49526
REG4	12.8673	12.5575	14.6144	13.8133	13.5531	10.2167	10.5727	10.933	11.2883	13.5114	7471	6027	25082	14394	12019	1189	1522	1954	2500	11676	1.58721	1.28043	5.32866	3.058	2.55343	0.252603	0.323348	0.415126	0.531124	2.48056
AQP3	11.8467	13.9772	13.6297	11.1699	11.1599	11.0755	11.1935	10.0941	12.599	11.3151	3682	16126	12674	2303	2287	2157	2341	1092	6203	2547	1.09649	4.80226	3.77427	0.685825	0.68106	0.642347	0.697141	0.325194	1.84723	0.758487
TFF2	10.8819	12.8622	12.3326	11.279	12.8325	10.5127	10.8289	10.0914	11.4589	11.888	1886	7445	5157	2484	7293	1460	1818	1090	2814	3789	1.37464	5.42638	3.75875	1.8105	5.3156	1.06414	1.32507	0.794461	2.05102	2.76166
CYSTM1	13.3129	13.335	13.9979	13.2925	13.2438	11.716	12.9989	12.5127	12.4969	11.973	10175	10332	16359	10032	9699	3363	8185	5843	5779	4019	1.9719	2.00233	3.17035	1.94419	1.87965	0.651744	1.58624	1.13236	1.11996	0.778876
TFF1	11.7936	13.9879	13.218	13.4748	14.9215	11.6847	13.0192	13.0044	12.1026	12.8876	3549	16246	9527	11384	31032	3291	8301	8216	4397	7577	2.54774	11.6626	6.8392	8.17229	22.2771	2.36253	5.95908	5.89806	3.1565	5.43934
RPS9	11.8057	11.6996	12.425	11.3044	12.5435	14.4331	11.9065	12.48	12.7973	13.0936	3579	3325	5498	2528	5969	22120	3838	5712	7117	8740	0.458729	0.426173	0.704691	0.324019	0.76506	2.83517	0.491925	0.73212	0.912202	1.12023

## Sheet: all_genes
	log2 of DESeq normalized counts										DESeq normalized counts										Ratio of DESeq normalized counts to 3' UTR +/-500bp
gene_name	hD1	hD7	hD8	hD9	hD10	iP2	iP3	iP5	iP6	iP7	hD1	hD7	hD8	hD9	hD10	iP2	iP3	iP5	iP6	iP7	hD1	hD7	hD8	hD9	hD10	iP2	iP3	iP5	iP6	iP7
HHAT	5.64386	5.55459	5.45943	4.80735	4.58496	3.90689	5.20945	4.16993	3	4.08746	49	46	43	27	23	14	36	17	7	16	0.008901	0.00835604	0.00781108	0.00490463	0.00417802	0.00254314	0.00653951	0.0030881	0.00127157	0.00290645
UAP1L1	5.32193	5.24793	5.39232	4.58496	5.80735	3.45943	4.58496	4.08746	3	4.08746	39	37	41	23	55	10	23	16	7	16	0.00928129	0.00880533	0.00975726	0.00547358	0.013089	0.00237982	0.00547358	0.00380771	0.00166587	0.00380771
RAB6B	5.75489	5.42626	5.67243	4.52356	5.42626	4.75489	3.58496	4.08746	3.16993	4.08746	53	42	50	22	42	26	11	16	8	16	0.00646657	0.00512445	0.00610054	0.00268424	0.00512445	0.00317228	0.00134212	0.00195217	0.000976086	0.00195217
BHLHE41	5.42626	6.06609	5.78136	4.90689	5.93074	4.32193	4.70044	3.58496	4.70044	4.32193	42	66	54	29	60	19	25	11	25	19	0.00746269	0.0117271	0.00959488	0.00515281	0.010661	0.00337598	0.00444208	0.00195451	0.00444208	0.00337598
KLHL17	4.75489	5.35755	5.88264	5.08746	5	3.45943	3.80735	4.39232	4.85798	4.08746	26	40	58	33	31	10	13	20	28	16	0.00385699	0.00593384	0.00860406	0.00489542	0.00459872	0.00148346	0.0019285	0.00296692	0.00415369	0.00237354
DLGAP1-AS2	5.08746	5.52356	6.2854	4.32193	5.64386	3	4.90689	3.90689	3.45943	5.12928	33	45	77	19	49	7	29	14	10	34	0.013796	0.0188127	0.0321906	0.00794314	0.0204849	0.00292642	0.0121237	0.00585284	0.0041806	0.014214
C2CD4B	4.75489	5.45943	6.56986	3.80735	6.06609	3	4.70044	4	3.58496	4.08746	26	43	94	13	66	7	25	15	11	16	0.0167634	0.027724	0.0606061	0.00838169	0.0425532	0.00451322	0.0161186	0.00967118	0.0070922	0.0103159
NBPF3	6.32193	6.12928	5.78136	3.58496	6.47573	4	4.39232	3.90689	3.58496	4.24793	79	69	54	11	88	15	20	14	11	18	0.00784508	0.00685204	0.00536246	0.00109235	0.00873883	0.00148957	0.0019861	0.00139027	0.00109235	0.00178749
SPC24	5.78136	6.06609	6.50779	6.14975	6.24793	4.52356	6	4.52356	4.70044	5.20945	54	66	90	70	75	22	63	22	25	36	0.00615806	0.00752651	0.0102634	0.00798267	0.00855286	0.00250884	0.0071844	0.00250884	0.00285095	0.00410537
TMEM38A	5.58496	7.10852	5.83289	6.30378	6.33985	4.16993	5.32193	4.24793	4.85798	4.75489	47	137	56	78	80	17	39	18	28	26	0.0116049	0.0338272	0.0138272	0.0192593	0.0197531	0.00419753	0.00962963	0.00444444	0.00691358	0.00641975
TMEM229B	4.58496	5.78136	5.83289	5.70044	6.49185	5.55459	5.39232	3.90689	4.16993	3.70044	23	54	56	51	89	46	41	14	17	12	0.00182932	0.00429492	0.00445399	0.00405631	0.00707866	0.00365863	0.00326096	0.0011135	0.0013521	0.000954426
SLC39A5	5.04439	5.24793	6.80735	6.42626	6.06609	4.08746	5.32193	3	3.58496	5.12928	32	37	111	85	66	16	39	7	11	34	0.00516796	0.00597545	0.0179264	0.0137274	0.0106589	0.00258398	0.00629845	0.00113049	0.00177649	0.00549096
PDE4C	4.70044	5.72792	6.91886	5.04439	6.98868	4.39232	3.90689	3.90689	3.16993	5.52356	25	52	120	32	126	20	14	14	8	45	0.00132901	0.00276434	0.00637925	0.00170113	0.00669821	0.00106321	0.000744245	0.000744245	0.000425283	0.00239222
COLCA2	4.24793	6.89482	6.04439	4.58496	7.05528	3	5.12928	4.08746	4.24793	3.80735	18	118	65	23	132	7	34	16	18	13	0.0109823	0.0719951	0.0396583	0.0140329	0.0805369	0.0042709	0.0207444	0.00976205	0.0109823	0.00793167
ME1	4.32193	6.04439	4.90689	5.16993	7.12928	4.16993	4.32193	2.80735	4.32193	4.70044	19	65	29	35	139	17	19	6	19	25	0.00695716	0.0238008	0.0106188	0.0128158	0.0508971	0.00622483	0.00695716	0.002197	0.00695716	0.00915416
CHST11	6.16993	5.20945	5	5.67243	5.61471	3.45943	3.90689	3.80735	4.24793	4.52356	71	36	31	50	48	10	14	13	18	22	0.00767319	0.00389063	0.00335026	0.00540365	0.00518751	0.00108073	0.00151302	0.00140495	0.00194532	0.00237761
DHRS13	5.97728	4.70044	4.80735	6.39232	5.9542	2.32193	3.80735	4.58496	3.70044	5.16993	62	25	27	83	61	4	13	23	12	35	0.0145951	0.00588512	0.00635593	0.0195386	0.0143597	0.00094162	0.00306026	0.00541431	0.00282486	0.00823917
DIAPH2	6.06609	5.75489	4.08746	5.52356	5.88264	2.58496	5.2854	4.32193	3.45943	4.85798	66	53	16	45	58	5	38	19	10	28	0.0080813	0.00648953	0.0019591	0.00550998	0.00710175	0.00061222	0.00465287	0.00232644	0.00122444	0.00342843
SYT17	5.78136	5.88264	6.40939	5.52356	5.49185	3	5.42626	5.16993	4.52356	4.16993	54	58	84	45	44	7	42	35	22	17	0.00740639	0.00795501	0.0115211	0.00617199	0.00603484	0.000960088	0.00576053	0.00480044	0.00301742	0.00233164
DLGAP1-AS1	5.75489	5.24793	6.02237	5.61471	4.75489	2	4.70044	5.35755	3.58496	4.32193	53	37	64	48	26	3	25	40	11	19	0.0142015	0.00991426	0.017149	0.0128617	0.00696677	0.000803859	0.00669882	0.0107181	0.00294748	0.0050911
ZNF488	6.20945	4.08746	6.53916	6.12928	5.78136	2.58496	4.9542	3.70044	2.80735	5.32193	73	16	92	69	54	5	30	12	6	39	0.0168825	0.00370028	0.0212766	0.0159574	0.0124884	0.00115634	0.00693802	0.00277521	0.0013876	0.00901943
CTC1	6.18982	5.35755	5.24793	6.52356	5.70044	5.04439	5.32193	4.85798	3.58496	4.80735	72	40	37	91	51	32	39	28	11	27	0.00452176	0.00251209	0.00232368	0.005715	0.00320291	0.00200967	0.00244929	0.00175846	0.000690825	0.00169566
C15orf38	5.42626	5.64386	5.45943	5.58496	6.08746	5.32193	5.04439	4.52356	3	4.32193	42	49	43	47	67	39	32	22	7	19	0.0092328	0.0107716	0.00945263	0.0103319	0.0147285	0.00857331	0.00703451	0.00483623	0.0015388	0.00417674
CDHR5	5.67243	6.20945	6.47573	6.30378	5.97728	4.45943	4.70044	5.72792	2.80735	5.24793	50	73	88	78	62	21	25	52	6	37	0.00335616	0.00489999	0.00590683	0.0052356	0.00416163	0.00140959	0.00167808	0.0034904	0.000402739	0.00248355
ECM1	4.75489	6.44294	5.32193	5.20945	5.80735	4.08746	4.80735	4.90689	3.58496	4.45943	26	86	39	36	55	16	27	29	11	21	0.00509205	0.0168429	0.00763807	0.00705053	0.0107716	0.00313357	0.0052879	0.00567959	0.00215433	0.00411281
NBPF14	4.85798	5.12928	5.2854	6.2854	5.32193	3.32193	4.85798	4.75489	3.70044	4.70044	28	34	38	77	39	9	28	26	12	25	0.00623053	0.00756564	0.00845572	0.017134	0.00867824	0.00200267	0.00623053	0.00578549	0.00267023	0.00556297
ZBED3	5.88264	6.88264	6.33985	4.24793	6.56986	4.80735	4.90689	5.58496	4.90689	4.08746	58	117	80	18	94	27	29	47	29	16	0.00667434	0.0134638	0.00920598	0.00207135	0.010817	0.00310702	0.00333717	0.00540852	0.00333717	0.0018412
EHD2	5.20945	6.96578	5.90689	5.49185	6.02237	4	3.16993	5.61471	3.70044	3	36	124	59	44	64	15	8	48	12	7	0.00477707	0.0164544	0.00782909	0.00583864	0.00849257	0.00199045	0.00106157	0.00636943	0.00159236	0.000928875
WNK2	5.67243	6.62936	7.27612	5.80735	6.04439	4.64386	4.9542	4.39232	4.70044	2.58496	50	98	154	55	65	24	30	20	25	5	0.00173004	0.00339089	0.00532854	0.00190305	0.00224906	0.000830421	0.00103803	0.000692018	0.000865022	0.000173004
EVC	5.58496	6.06609	5.2854	5.78136	6.02237	3.58496	5.45943	5.04439	4.90689	2.32193	47	66	38	54	64	11	43	32	29	4	0.00350668	0.00492427	0.00283519	0.00402895	0.00477505	0.000820712	0.00320824	0.00238753	0.00216369	0.000298441
TXNP1	5.93074	6.40939	6.16993	6.04439	4.16993	4.75489	3.45943	4.75489	5.39232	3.32193	60	84	71	65	17	26	10	26	41	9	0.0501672	0.0702341	0.0593645	0.0543478	0.014214	0.0217391	0.0083612	0.0217391	0.0342809	0.00752508
LYPD6B	5.80735	5.45943	5.67243	5.72792	4.80735	3	4.70044	4.52356	3.70044	2.80735	55	43	50	52	27	7	25	22	12	6	0.00483985	0.00378388	0.00439986	0.00457585	0.00237592	0.00061598	0.00219993	0.00193594	0.00105597	0.000527983
PASK	4.9542	4.85798	4.75489	5.35755	5.04439	2.58496	4.24793	4.45943	3	3.32193	30	28	26	40	32	5	18	21	7	9	0.00226313	0.00211225	0.00196138	0.0030175	0.002414	0.000377188	0.00135788	0.00158419	0.000528063	0.000678938
GLMN	5.85798	4.70044	4.64386	6.22882	4.58496	3.45943	4.52356	3.32193	4	2.32193	57	25	24	74	23	10	22	9	15	4	0.00775088	0.00339951	0.00326353	0.0100626	0.00312755	0.0013598	0.00299157	0.00122382	0.00203971	0.000543922
SNAI3-AS1	4.45943	4.45943	4.64386	5.93074	5.35755	4.39232	4.39232	4.08746	3.45943	1.58496	21	21	24	60	40	20	20	16	10	2	0.0035076	0.0035076	0.00400869	0.0100217	0.00668114	0.00334057	0.00334057	0.00267246	0.00167029	0.000334057
CAPN9	5.12928	3.45943	5.67243	5.04439	6.88264	2.80735	3.32193	5.61471	4.16993	2.32193	34	10	50	32	117	6	9	48	17	4	0.0212102	0.0062383	0.0311915	0.0199626	0.0729881	0.00374298	0.00561447	0.0299439	0.0106051	0.00249532
IL1R2	5.42626	4.32193	6.56986	5.61471	5.42626	4	2.80735	3.90689	2.80735	4.39232	42	19	94	48	42	15	6	14	6	20	0.00561347	0.00253943	0.0125635	0.0064154	0.00561347	0.00200481	0.000801925	0.00187116	0.000801925	0.00267308
GPA33	4.39232	5.24793	6.26679	6	6.18982	2.58496	2.32193	3.58496	2.80735	4.80735	20	37	76	63	72	5	4	11	6	27	0.00324044	0.00599482	0.0123137	0.0102074	0.0116656	0.00081011	0.000648088	0.00178224	0.000972132	0.00437459
DKK3	5.97728	6.35755	7.5157	6.18982	3.45943	2.32193	5.12928	3.45943	4.90689	3.70044	62	81	182	72	10	4	34	10	29	12	0.00608141	0.00794507	0.0178519	0.00706229	0.000980873	0.000392349	0.00333497	0.000980873	0.00284453	0.00117705
BTNL9	5.58496	4.45943	6.84549	6.62936	2.80735	2.32193	5.32193	4.39232	2.32193	2.32193	47	21	114	98	6	4	39	20	4	4	0.00421109	0.00188155	0.0102141	0.00878058	0.000537586	0.000358391	0.00349431	0.00179195	0.000358391	0.000358391
PF4	5.16993	5.90689	5.67243	7.93664	6	1.58496	5.55459	2.80735	2.80735	2	35	59	50	244	63	2	46	6	6	3	0.026455	0.0445956	0.0377929	0.184429	0.047619	0.00151172	0.0347695	0.00453515	0.00453515	0.00226757
PRODH	4.85798	2.58496	6.80735	6.83289	7.58496	5.16993	1	5.49185	3.70044	4.32193	28	5	111	113	191	35	1	44	12	19	0.0031489	0.000562303	0.0124831	0.0127081	0.02148	0.00393612	0.000112461	0.00494827	0.00134953	0.00213675
TNFRSF1B	4.64386	5.49185	5.08746	4.90689	6.49185	3.58496	4.52356	2.32193	1	2.80735	24	44	33	29	89	11	22	4	1	6	0.00414079	0.00759144	0.00569358	0.00500345	0.0153554	0.00189786	0.00379572	0.000690131	0.000172533	0.0010352
RP11-304L19.1	5	5.88264	4.45943	4.32193	5.90689	3.70044	4.58496	2.80735	0	3.45943	31	58	21	19	59	12	23	6	0	10	0.0129599	0.0242475	0.00877926	0.00794314	0.0246656	0.00501672	0.00961538	0.00250836	0	0.0041806
MOGAT3	4.39232	4.75489	4.90689	4.85798	5.20945	2	4.32193	2.32193	0	3.90689	20	26	29	28	36	3	19	4	0	14	0.00904159	0.0117541	0.0131103	0.0126582	0.0162749	0.00135624	0.00858951	0.00180832	0	0.00632911
CYP4F2	2.58496	6.10852	5	3.32193	7.33092	3	4.85798	2.80735	0	3.32193	5	68	31	9	160	7	28	6	0	9	0.000530335	0.00721256	0.00328808	0.000954603	0.0169707	0.000742469	0.00296988	0.000636402	0	0.000954603
LINC00173	5.67243	7.37504	6.94251	5.75489	6.04439	3.70044	6.47573	5.24793	0	2.58496	50	165	122	53	65	12	88	37	0	5	0.0139159	0.0459226	0.0339549	0.0147509	0.0180907	0.00333983	0.0244921	0.0102978	0	0.00139159
ANK1	3.32193	6.20945	6.74147	4.45943	5.83289	3.45943	5.12928	4.58496	0	0	9	73	106	21	56	10	34	23	0	0	0.000733855	0.00595238	0.00864318	0.00171233	0.00456621	0.000815395	0.00277234	0.00187541	0	0
ZNF765	5.16993	4.85798	4.52356	4.52356	4.58496	1	3.80735	4	4.58496	2.80735	35	28	22	22	23	1	13	15	23	6	0.00269417	0.00215534	0.00169348	0.00169348	0.00177046	7.69764e-05	0.00100069	0.00115465	0.00177046	0.000461858
KLRAP1	5.32193	4.52356	4.24793	5.24793	5	0	3.45943	3.90689	4.9542	2.58496	39	22	18	37	31	0	10	14	30	5	0.0102605	0.00578795	0.0047356	0.00973428	0.00815575	0	0.00263089	0.00368324	0.00789266	0.00131544
SLC9A4	4.80735	5.12928	4.52356	4.32193	4.85798	0	2.58496	2.80735	4.52356	3	27	34	22	19	28	0	5	6	22	7	0.00734494	0.00924918	0.00598477	0.00516866	0.00761697	0	0.00136017	0.00163221	0.00598477	0.00190424
CREG2	4.39232	4.32193	3.90689	4.52356	5.04439	1.58496	3.45943	3.80735	3.90689	2.32193	20	19	14	22	32	2	10	13	14	4	0.00223214	0.00212054	0.0015625	0.00245536	0.00357143	0.000223214	0.00111607	0.00145089	0.0015625	0.000446429
PSAPL1	4.75489	4.75489	5.08746	5.72792	6.49185	0	3.16993	4.08746	3.90689	2.32193	26	26	33	52	89	0	8	16	14	4	0.00647088	0.00647088	0.00821304	0.0129418	0.0221503	0	0.00199104	0.00398208	0.00348432	0.00099552
UVSSA	4.58496	5.70044	5.83289	5.04439	4.90689	1.58496	4.58496	5.04439	2.32193	0	23	51	56	32	29	2	23	32	4	0	0.00261364	0.00579545	0.00636364	0.00363636	0.00329545	0.000227273	0.00261364	0.00363636	0.000454545	0
ERVK13-1	5.52356	4.45943	5.08746	4.58496	4.90689	0	5.20945	3.16993	3.58496	1	45	21	33	23	29	0	36	8	11	1	0.0062301	0.00290738	0.00456874	0.00318427	0.00401495	0	0.00498408	0.00110757	0.00152291	0.000138447
TLR6	4.39232	5	3.45943	4.9542	5.85798	0	3.16993	4	2.32193	0	20	31	10	30	57	0	8	15	4	0	0.0033687	0.00522149	0.00168435	0.00505306	0.00960081	0	0.00134748	0.00252653	0.000673741	0
ZNF674-AS1	4.08746	4.32193	5.80735	4.58496	4.08746	0	3.80735	3.90689	0	4.52356	16	19	55	23	16	0	13	14	0	22	0.00668896	0.00794314	0.0229933	0.00961538	0.00668896	0	0.00543478	0.00585284	0	0.00919732
AGMO	4.32193	4.32193	4.9542	4.39232	4.85798	0	3.80735	3.32193	1	3.32193	19	19	30	20	28	0	13	9	1	9	0.00307942	0.00307942	0.00486224	0.00324149	0.00453809	0	0.00210697	0.00145867	0.000162075	0.00145867
GYG2	5.52356	5.52356	5.88264	5.64386	4.58496	0	6.40939	2.58496	0	3.90689	45	45	58	49	23	0	84	5	0	14	0.00691138	0.00691138	0.008908	0.00752573	0.00353248	0	0.0129012	0.000767931	0	0.00215021
AP001469.9	5.85798	4.9542	5.49185	5.42626	3.90689	2.80735	3.16993	3.70044	0	3.80735	57	30	44	42	14	6	8	12	0	13	0.0238294	0.0125418	0.0183946	0.0175585	0.00585284	0.00250836	0.00334448	0.00501672	0	0.00543478
SLC35F3	5.39232	5.39232	4.90689	3.45943	3.32193	1.58496	4.58496	3.58496	0	3.16993	41	41	29	10	9	2	23	11	0	8	0.0166059	0.0166059	0.0117456	0.00405022	0.0036452	0.000810045	0.00931551	0.00445525	0	0.00324018
SPRR1A	7.70044	2.32193	6	6.26679	4.90689	0	3.90689	5.58496	2.32193	3.45943	207	4	63	76	29	0	14	47	4	10	0.137177	0.00265076	0.0417495	0.0503645	0.019218	0	0.00927767	0.0311465	0.00265076	0.00662691
NAGPA	5.88264	5.61471	6.16993	7.01123	7.14975	5.20945	5.61471	5.67243	4.9542	5.04439	58	48	71	128	141	36	48	50	30	32	0.00485599	0.00401875	0.00594441	0.0107167	0.0118051	0.00301407	0.00401875	0.0041862	0.00251172	0.00267917
CYP2C18	6.2854	5.70044	6.24793	6.62936	6.88264	5.20945	5.24793	4.85798	4.24793	5.45943	77	51	75	98	117	36	37	28	18	43	0.0396498	0.0262616	0.03862	0.0504634	0.0602472	0.0185376	0.0190525	0.0144181	0.0092688	0.0221421
TMEM86B	5.88264	5.78136	6.53916	6.12928	7.37504	5.08746	6.04439	5.78136	3.45943	4.9542	58	54	92	69	165	33	65	54	10	30	0.0326577	0.0304054	0.0518018	0.0388514	0.0929054	0.0185811	0.0365991	0.0304054	0.00563063	0.0168919
ZXDC	6.56986	6.52356	5.72792	6.91886	6.47573	5.42626	5.97728	6.35755	3.16993	4.45943	94	91	52	120	88	42	62	81	8	21	0.0157322	0.0152301	0.00870293	0.0200837	0.014728	0.00702929	0.0103766	0.0135565	0.00133891	0.00351464
RP11-463O9.5	5.88264	6.62936	6.47573	6.16993	5.90689	5.75489	5.61471	5.72792	3.70044	4.24793	58	98	88	71	59	53	48	52	12	18	0.048495	0.0819398	0.0735786	0.0593645	0.0493311	0.0443144	0.0401338	0.0434783	0.0100334	0.0150502
DHRS11	6	6.74147	7.05528	7.40939	6.35755	5.20945	6.22882	6	3.16993	6.32193	63	106	132	169	81	36	74	63	8	79	0.0071074	0.0119585	0.0148917	0.0190659	0.00913809	0.00406137	0.00834838	0.0071074	0.000902527	0.00891245
OR7E14P	5.88264	7.04439	6.75489	7.24793	5.42626	5.20945	5.24793	5.93074	3.58496	6.49185	58	131	107	151	42	36	37	60	11	89	0.016165	0.0365106	0.0298216	0.0420847	0.0117057	0.0100334	0.0103122	0.0167224	0.00306577	0.0248049
SLC12A8	5.61471	6.39232	6.30378	7.09803	5.72792	4.64386	5.24793	5.39232	5.39232	5.24793	48	83	78	136	52	24	37	41	41	37	0.00287563	0.00497244	0.0046729	0.00814762	0.00311526	0.00143781	0.00221663	0.00245627	0.00245627	0.00221663
LYPD6	6.16993	5.85798	6.30378	6.67243	5.32193	4.24793	4.70044	5.20945	4.70044	5.39232	71	57	78	101	39	18	25	36	25	41	0.0085697	0.0068799	0.0094146	0.0121907	0.0047073	0.0021726	0.0030175	0.0043452	0.0030175	0.0049487
RMI2	6.44294	6.37504	5.9542	7.49185	6.47573	5.08746	4.52356	5.2854	5.08746	6.59991	86	82	61	179	88	33	22	38	33	96	0.0240492	0.0229306	0.0170582	0.0500559	0.0246085	0.00922819	0.00615213	0.0106264	0.00922819	0.0268456
HMHA1	6.79442	6.02237	5.72792	6.82018	4.90689	4.08746	5.49185	4.80735	3.58496	5.9542	110	64	52	112	29	16	44	27	11	61	0.00489803	0.00284976	0.00231543	0.00498709	0.0012913	0.000712441	0.00195921	0.00120224	0.000489803	0.00271618
GPRIN2	5.9542	5.58496	7.65105	6.39232	5.58496	5.49185	5.75489	5.20945	4.24793	5.72792	61	47	200	83	47	44	53	36	18	52	0.00955364	0.007361	0.0313234	0.0129992	0.007361	0.00689115	0.0083007	0.00563821	0.00281911	0.00814409
CCDC24	5.39232	5.52356	6.94251	8.01123	5.58496	5.08746	5.49185	5.52356	5.20945	4.80735	41	45	122	257	47	33	44	45	36	27	0.00604987	0.00664011	0.0180021	0.0379224	0.00693522	0.00486941	0.00649255	0.00664011	0.00531208	0.00398406
KRT13	7.30378	5.70044	8.87036	6.61471	6.84549	4.58496	4.70044	6.22882	3.45943	7.66534	157	51	467	97	114	23	25	74	10	202	0.017373	0.00564347	0.0516764	0.0107337	0.0126148	0.00254509	0.0027664	0.00818856	0.00110656	0.0223526
AIFM2	7.53138	6.49185	7.74819	6.37504	6.37504	4	5.24793	6	2.80735	6.72792	184	89	214	82	82	15	37	63	6	105	0.0267092	0.0129191	0.031064	0.011903	0.011903	0.00217738	0.00537088	0.00914501	0.000870954	0.0152417
AKR1C2	4.70044	7.69349	6.79442	8.20457	8.66534	3.90689	7.45121	7.03342	2.80735	5.9542	25	206	110	294	405	14	174	130	6	61	0.00225388	0.0185719	0.00991706	0.0265056	0.0365128	0.00126217	0.015687	0.0117202	0.00054093	0.00549946
ELFN2	6.90689	6.83289	7.34873	6.75489	6.91886	5.12928	5.45943	4.70044	5.32193	5.42626	119	113	162	107	120	34	43	25	39	42	0.0157366	0.0149431	0.0214229	0.0141497	0.0158688	0.00449617	0.00568633	0.003306	0.00515737	0.00555409
PIDD	5.88264	6.74147	7.53138	6.83289	6	5.12928	4.64386	5.93074	5.78136	5.08746	58	106	184	113	63	34	24	60	54	33	0.00334776	0.00611833	0.0106205	0.00652237	0.00363636	0.00196248	0.00138528	0.0034632	0.00311688	0.00190476
AC093673.5	6.40939	6.71425	7.18982	5.61471	6.56986	6.32193	5.2854	5.90689	5.32193	4.32193	84	104	145	48	94	79	38	59	39	19	0.0702341	0.0869565	0.121237	0.0401338	0.0785953	0.0660535	0.0317726	0.0493311	0.0326087	0.0158863
TTC39A	6.75489	6.22882	6.91886	5.70044	6.20945	5.78136	5.45943	5.20945	5.08746	5	107	74	120	51	73	54	43	36	33	31	0.00586655	0.00405724	0.00657931	0.00279621	0.00400241	0.00296069	0.00235759	0.00197379	0.00180931	0.00169965
SLC6A20	5.45943	7	8.3443	6.18982	7.2854	3.45943	5.88264	6.02237	5.04439	5.70044	43	127	324	72	155	10	58	64	32	51	0.00517324	0.0152791	0.0389798	0.00866218	0.0186477	0.00120308	0.00697786	0.00769971	0.00384986	0.00613571
DACT2	4.9542	6.97728	7.55459	5.97728	7.03342	5.61471	6.37504	5.88264	4.9542	2.58496	30	125	187	62	130	48	82	58	30	5	0.00753012	0.0313755	0.0469378	0.0155622	0.0326305	0.0120482	0.0205823	0.0145582	0.00753012	0.00125502
SSTR5-AS1	3.58496	4.9542	9.35755	4.75489	6.74147	4.45943	6.55459	3.90689	4.45943	3.90689	11	30	655	26	106	21	93	14	21	14	0.00416983	0.0113723	0.248294	0.00985595	0.040182	0.00796058	0.035254	0.00530705	0.00796058	0.00530705
SLC17A9	6.06609	6.10852	5.67243	6.04439	6.78136	3.70044	5.08746	3.90689	0	5.45943	66	68	50	65	109	12	33	14	0	43	0.0140875	0.0145144	0.0106724	0.0138741	0.0232657	0.00256137	0.00704376	0.00298826	0	0.00917823
MYZAP	5.12928	5.2854	4.80735	5.45943	5.97728	3	4	4.32193	1	4.9542	34	38	27	43	62	7	15	19	1	30	0.010198	0.0113977	0.00809838	0.0128974	0.0185963	0.00209958	0.0044991	0.00569886	0.00029994	0.0089982
MX1	4.70044	4.24793	6.02237	7.12928	5.55459	5.55459	5.12928	4	0	3	25	18	64	139	46	46	34	15	0	7	0.0016818	0.0012109	0.00430542	0.00935082	0.00309452	0.00309452	0.00228725	0.00100908	0	0.000470905
APBB1IP	5.64386	4.32193	5.24793	7.32193	4.64386	4.9542	4.85798	3.32193	0	4.80735	49	19	37	159	24	30	28	9	0	27	0.010506	0.00407376	0.0079331	0.0340909	0.0051458	0.00643225	0.00600343	0.00192967	0	0.00578902
PPBP	6.04439	4.85798	5.70044	9.48382	2	4.85798	4.64386	5.85798	0	4.39232	65	28	51	715	3	28	24	57	0	20	0.0454545	0.0195804	0.0356643	0.5	0.0020979	0.0195804	0.0167832	0.0398601	0	0.013986
RP11-159D12.5	6.84549	7.30378	4.80735	6.33985	6.53916	3.45943	5.12928	5.55459	5.35755	5.16993	114	157	27	80	92	10	34	46	40	35	0.0814868	0.112223	0.0192995	0.0571837	0.0657613	0.00714796	0.0243031	0.0328806	0.0285919	0.0250179
RP11-159D12.2	6.83289	7.26679	4.80735	6.32193	6.53916	3.45943	5.08746	5.55459	5.24793	5.16993	113	153	27	79	92	10	33	46	37	35	0.0940883	0.127394	0.0224813	0.0657785	0.0766028	0.00832639	0.0274771	0.0383014	0.0308077	0.0291424
SPP1	6.04439	6.04439	5.70044	7.62205	6.40939	4.16993	4.70044	5.78136	6.42626	4.45943	65	65	51	196	84	17	25	54	85	21	0.00973783	0.00973783	0.00764045	0.0293633	0.0125843	0.00254682	0.00374532	0.00808989	0.0127341	0.00314607
PIGB	6.35755	5.52356	4.64386	8.24793	5.83289	3	5.83289	5.16993	5.83289	4.58496	81	45	24	303	56	7	56	35	56	23	0.00590939	0.00328299	0.00175093	0.0221055	0.0040855	0.000510688	0.0040855	0.00255344	0.0040855	0.00167797
PDZD3	6.06609	7.03342	6.53916	6.53916	6.75489	1	6.2854	3	5.58496	4.9542	66	130	92	92	107	1	77	7	47	30	0.0110479	0.021761	0.0154001	0.0154001	0.0179109	0.000167392	0.0128892	0.00117174	0.00786743	0.00502176
MECOM	5.83289	6.71425	5.08746	6.40939	5.61471	1.58496	5.12928	4.39232	5.49185	3.58496	56	104	33	84	48	2	34	20	44	11	0.00502062	0.00932401	0.00295858	0.00753093	0.00430339	0.000179308	0.00304823	0.00179308	0.00394477	0.000986193
CLRN3	6.20945	5.61471	5.88264	5.88264	7.5157	1	5.39232	4.64386	4.32193	6.59991	73	48	58	58	182	1	41	24	19	96	0.0485372	0.0319149	0.0385638	0.0385638	0.121011	0.000664894	0.0272606	0.0159574	0.012633	0.0638298
CA2	5.16993	6.93074	6.40939	6.26679	7.43463	1.58496	4.52356	3.58496	3.45943	5	35	121	84	76	172	2	22	11	10	31	0.00352787	0.0121964	0.00846689	0.00766052	0.017337	0.000201593	0.00221752	0.00110876	0.00100796	0.00312469
SLC16A1	7.40088	8.19476	7.62936	7.33092	8.26209	4.39232	5.42626	5.08746	5.88264	7.04439	168	292	197	160	306	20	42	33	58	131	0.0163727	0.0284573	0.0191989	0.015593	0.0298217	0.00194913	0.00409317	0.00321606	0.00565247	0.0127668
NOSTRIN	7.13955	8.30378	6.08746	6.84549	7.24793	3.58496	6.50779	5.39232	6.12928	6.02237	140	315	67	114	151	11	90	41	69	64	0.00961605	0.0216361	0.00460196	0.00783021	0.0103716	0.000755546	0.00618174	0.00281613	0.00473934	0.00439591
MUC17	8.21917	6.62936	6.20945	6.33985	8.11894	3.45943	6.71425	4.85798	4.45943	6.94251	297	98	73	80	277	10	104	28	21	122	0.0302475	0.00998065	0.00743457	0.00814747	0.0282106	0.00101843	0.0105917	0.00285161	0.00213871	0.0124249
KIF13A	7.39232	6.37504	6.55459	7.31288	6.39232	4.08746	6.32193	6.08746	4.85798	6.40939	167	82	93	158	83	16	79	67	28	84	0.0108866	0.0053455	0.00606258	0.0102999	0.00541069	0.00104302	0.00514993	0.00436767	0.00182529	0.00547588
TNNI2	7.19967	7.74147	8.04439	6.2854	5.78136	3.80735	6.70044	3.16993	6.59991	4.45943	146	213	263	77	54	13	103	8	96	21	0.0579135	0.0844903	0.104324	0.0305434	0.0214201	0.00515668	0.0408568	0.00317334	0.0380801	0.00833003
CALB2	6.75489	8.14975	6.85798	5.90689	7.33092	4.90689	5.49185	2.32193	4.75489	6.35755	107	283	115	59	160	29	44	4	26	81	0.0345607	0.0914083	0.0371447	0.0190568	0.0516796	0.00936693	0.0142119	0.00129199	0.00839793	0.0261628
FABP1	10.0471	6.35755	6.2854	9.19229	6.47573	3.45943	5.04439	1.58496	4.90689	6.18982	1057	81	77	584	88	10	32	2	29	72	0.274332	0.0210226	0.0199844	0.15157	0.0228393	0.00259538	0.00830522	0.000519076	0.0075266	0.0186867
RP11-211G23.2	8.46761	6.71425	5.16993	6.32193	6.47573	1.58496	6.47573	3	2	5.67243	353	104	35	79	88	2	88	7	3	50	0.295151	0.0869565	0.0292642	0.0660535	0.0735786	0.00167224	0.0735786	0.00585284	0.00250836	0.041806
HEPH	7.56986	6.53916	8.65821	4.80735	6.2854	0	2.80735	2.58496	1	6.39232	189	92	403	27	77	0	6	5	1	83	0.0230685	0.0112291	0.0491883	0.0032955	0.00939827	0	0.000732332	0.000610277	0.000122055	0.0101306
IFI27	5.32193	8.70736	4.24793	8.11894	11.9833	4.39232	3.58496	3.58496	5.24793	2.32193	39	417	18	277	4048	20	11	11	37	4	0.00616698	0.0659393	0.0028463	0.0438014	0.640101	0.00316256	0.00173941	0.00173941	0.00585073	0.000632511
CLDN18	3.58496	7.99435	5.70044	4	9.51964	5.20945	4.39232	7.39232	5.24793	0	11	254	51	15	733	36	20	167	37	0	0.00222988	0.05149	0.0103385	0.00304075	0.148591	0.00729779	0.00405433	0.0338536	0.00750051	0
MAPK11	5.9542	5.85798	6.04439	5.90689	4.58496	8.08746	5.9542	7.26679	7.6865	6.74147	61	57	65	59	23	271	61	153	205	106	0.00800105	0.00747639	0.00852571	0.00773872	0.00301679	0.0355456	0.00800105	0.0200682	0.0268888	0.0139035
PTK7	4.85798	5.97728	5.83289	5.49185	4.08746	8.40939	6.78136	7.12928	6.40939	6.26679	28	62	56	44	16	339	109	139	84	76	0.00112949	0.00250101	0.00225898	0.00177491	0.000645422	0.0136749	0.00439693	0.0056071	0.00338846	0.00306575
LRG1	6.10852	6.08746	6.72792	4.70044	4.85798	6.89482	6.90689	6.82018	7.83289	5.72792	68	67	105	25	28	118	119	112	227	52	0.0173337	0.0170788	0.0267652	0.00637267	0.00713739	0.030079	0.0303339	0.0285496	0.0578639	0.0132552
PTGES	7.5157	5.85798	6.35755	6.50779	5.20945	9.72451	7.74819	7.26679	7.20945	7.15987	182	57	81	90	36	845	214	153	147	142	0.0735057	0.023021	0.0327141	0.0363489	0.0145396	0.341276	0.0864297	0.0617932	0.05937	0.0573506
AL590369.1	7.5157	5.85798	6.35755	6.50779	5.20945	9.72281	7.74819	7.24793	7.20945	7.15987	182	57	81	90	36	844	214	151	147	142	0.152174	0.0476589	0.0677258	0.0752508	0.0301003	0.705686	0.17893	0.126254	0.12291	0.118729
RPS3P6	5.61471	5.93074	5.49185	4.9542	7.19967	8.56224	6.04439	6.65821	6.39232	7.83289	48	60	44	30	146	377	65	100	83	227	0.0401338	0.0501672	0.0367893	0.0250836	0.122074	0.315217	0.0543478	0.083612	0.069398	0.189799
PLEKHG5	5.55459	5.35755	4.90689	5.20945	6.12928	7.66534	6	5.88264	6.06609	7.24793	46	40	29	36	69	202	63	58	66	151	0.0118771	0.0103279	0.00748774	0.00929512	0.0178156	0.052156	0.0162665	0.0149755	0.0170411	0.0389879
NEDD8-MDP1	6.80735	7.05528	6.2854	6.42626	6.58496	7.78136	7.97154	7.20945	8.88264	6.74147	111	132	77	85	95	219	250	147	471	106	0.0190231	0.0226221	0.0131962	0.0145673	0.0162811	0.0375321	0.0428449	0.0251928	0.0807198	0.0181662
CASP4	6.79442	6.62936	6.53916	5.83289	6.83289	7.98868	7.67243	7.44294	7.94837	6.82018	110	98	92	56	113	253	203	173	246	112	0.0113683	0.0101282	0.00950806	0.00578752	0.0116784	0.0261472	0.0209797	0.0178793	0.0254237	0.011575
GABBR1	6.6865	6.12928	6.26679	6.45943	6.12928	8.59619	7.82018	6.67243	7.78136	6.24793	102	69	76	87	69	386	225	101	219	75	0.0034804	0.00235439	0.00259324	0.00296857	0.00235439	0.0131709	0.00767735	0.00344628	0.00747262	0.00255912
MDP1	6.20945	6.47573	5.49185	5.80735	5.97728	7.16993	7.37504	6.64386	8.27146	5.93074	73	88	44	55	62	143	165	99	308	60	0.0284379	0.0342813	0.0171406	0.0214258	0.0241527	0.0557071	0.0642774	0.0385664	0.119984	0.0233736
PFDN4	6.67243	6.24793	6.18982	6.45943	6.14975	7.98299	6.62936	6.91886	7.83289	7.54689	101	75	72	87	70	252	98	120	227	186	0.0181916	0.0135086	0.0129683	0.01567	0.0126081	0.045389	0.0176513	0.0216138	0.0408862	0.0335014
MED21	6.52356	6.79442	5.24793	6.89482	6.47573	6.20945	7.72792	7.10852	8.23362	7.65105	91	110	37	118	88	73	211	137	300	200	0.00880844	0.0106476	0.00358145	0.0114219	0.00851805	0.00706611	0.020424	0.0132611	0.0290388	0.0193592
HLA-DMA	6.30378	3.90689	7.12928	2.80735	6.78136	8.40939	7.63662	7.03342	7.48382	4.45943	78	14	139	6	109	339	198	130	178	21	0.0154916	0.00278054	0.0276068	0.00119166	0.0216485	0.0673287	0.0393247	0.0258193	0.0353525	0.0041708
ANKRD50	5.2854	5.24793	4.80735	4.24793	4.16993	6.42626	5.80735	5.04439	6.53916	5.52356	38	37	27	18	17	85	55	32	92	45	0.00671259	0.00653595	0.00476948	0.00317965	0.003003	0.015015	0.0097156	0.00565271	0.0162515	0.00794913
PKIG	4.90689	5	4.70044	3.58496	4.70044	6.45943	5.80735	5.16993	6.14975	5.2854	29	31	25	11	25	87	55	35	70	38	0.00639894	0.00684025	0.00551633	0.00242718	0.00551633	0.0191968	0.0121359	0.00772286	0.0154457	0.00838482
SH3BP5	4.32193	4.70044	4.75489	4.24793	3.58496	6.24793	5.45943	4.58496	6.26679	5.35755	19	25	26	18	11	75	43	23	76	40	0.00189149	0.0024888	0.00258835	0.00179194	0.00109507	0.0074664	0.00428074	0.0022897	0.00756595	0.00398208
LINC00324	4.9542	4.16993	3.90689	5.12928	5.04439	6.12928	6.08746	4.64386	7.48382	5.20945	30	17	14	34	32	69	67	24	178	36	0.0250836	0.014214	0.0117057	0.0284281	0.0267559	0.0576923	0.0560201	0.0200669	0.148829	0.0301003
ST6GAL2	4.52356	4.08746	4.45943	5.52356	4.64386	5.90689	5.42626	6.83289	6.53916	4.75489	22	16	21	45	24	59	42	113	92	26	0.00251947	0.00183234	0.00240495	0.00515346	0.00274851	0.00675676	0.00480989	0.0129409	0.010536	0.00297755
ZNF551	3.70044	4.45943	4.08746	4.75489	4.45943	5.72792	5.24793	5.55459	5.67243	5.04439	12	21	16	26	21	52	37	46	50	32	0.00165175	0.00289057	0.00220234	0.0035788	0.00289057	0.0071576	0.00509291	0.00633173	0.00688231	0.00440468
UGT2B7	3.80735	4.32193	4.45943	5.45943	6.33985	5.9542	5.45943	6.45943	6.52356	6.90689	13	19	21	43	80	61	43	87	91	119	0.00447813	0.00654495	0.0072339	0.0148123	0.0275577	0.0210127	0.0148123	0.029969	0.0313469	0.0409921
FRG1B	4.32193	5.16993	3	4.52356	5.64386	6.30378	5.80735	5.64386	6.06609	6.08746	19	35	7	22	49	78	55	49	66	67	0.00252123	0.00464437	0.000928875	0.00291932	0.00650212	0.0103503	0.0072983	0.00650212	0.00875796	0.00889066
CENPC	4.58496	5.04439	3	5.35755	5.55459	6.47573	4.80735	5.12928	5.52356	8.19476	23	32	7	40	46	88	27	34	45	292	0.00123689	0.00172089	0.000376445	0.00215112	0.00247378	0.00473245	0.001452	0.00182845	0.00242001	0.0157031
IFT52	4.90689	5.45943	5.58496	5.61471	4.70044	6.64386	5.80735	5.80735	6.75489	6.44294	29	43	47	48	25	99	55	55	107	86	0.0045059	0.00668117	0.00730267	0.00745805	0.0038844	0.0153822	0.00854568	0.00854568	0.0166252	0.0133623
PEX11G	4.70044	4.70044	5.67243	5.08746	5.49185	6.87036	5.9542	5.42626	6.45943	6.14975	25	25	50	33	44	116	61	42	87	70	0.016415	0.016415	0.0328299	0.0216678	0.0288903	0.0761655	0.0400525	0.0275772	0.0571241	0.0459619
SNORD3A	3.90689	4.64386	6.40939	6.22882	5.24793	8.19967	5.20945	5.72792	7.24793	7.31288	14	24	84	74	37	293	36	52	151	158	0.00585284	0.0100334	0.0351171	0.0309365	0.0154682	0.122492	0.0150502	0.0217391	0.0631271	0.0660535
C4orf48	5.90689	3.90689	5.78136	5.70044	3.80735	8.25739	4.39232	6.2854	7.01123	6.74147	59	14	54	51	13	305	20	77	128	106	0.0475806	0.0112903	0.0435484	0.041129	0.0104839	0.245968	0.016129	0.0620968	0.103226	0.0854839
HNRNPA3P3	5.88264	5.67243	5.83289	6.44294	5.97728	4.9542	6.72792	5.24793	10.0112	6.39232	58	50	56	86	62	30	105	37	1031	83	0.0474632	0.0409165	0.0458265	0.0703764	0.0507365	0.0245499	0.0859247	0.0302782	0.843699	0.0679214
FTX	3.90689	5	5.49185	5.78136	5.64386	5.20945	6.70044	6.08746	8.79442	4.32193	14	31	44	54	49	36	103	67	443	19	0.00145198	0.0032151	0.00456337	0.0056005	0.00508193	0.00373367	0.0106824	0.00694877	0.0459448	0.00197055
MFAP5	7.6865	1	1	5.52356	4.90689	9.77643	7.36632	5.35755	6.65821	6.90689	205	1	1	45	29	876	164	40	100	119	0.018887	9.21319e-05	9.21319e-05	0.00414594	0.00267183	0.0807076	0.0151096	0.00368528	0.00921319	0.0109637
AL513327.1	3.45943	3	4.90689	4.52356	3.90689	5.97728	4.08746	4.90689	6.20945	4.85798	10	7	29	22	14	62	16	29	73	28	0.0083612	0.00585284	0.0242475	0.0183946	0.0117057	0.0518395	0.0133779	0.0242475	0.0610368	0.0234114
EVA1B	4.16993	3.45943	3.32193	3.80735	3.16993	7.11894	3.90689	4.45943	5.83289	5.42626	17	10	9	13	8	138	14	21	56	42	0.0116438	0.00684932	0.00616438	0.00890411	0.00547945	0.0945205	0.00958904	0.0143836	0.0383562	0.0287671
CD14	2.32193	3.90689	3.80735	4.45943	2.58496	4.70044	4.08746	4.16993	7.20945	4.45943	4	14	13	21	5	25	16	17	147	21	0.0010543	0.00369004	0.00342646	0.00553506	0.00131787	0.00658935	0.00421719	0.00448076	0.0387454	0.00553506
GZF1	4.32193	3.58496	2.58496	4.39232	3.70044	4.39232	4.9542	5.2854	6.49185	4.9542	19	11	5	20	12	20	30	38	89	30	0.00304976	0.00176565	0.000802568	0.00321027	0.00192616	0.00321027	0.00481541	0.00609952	0.0142857	0.00481541
SESN3	5.35755	4.08746	2.58496	3.45943	2	5.67243	4.32193	4.64386	7.45943	4.08746	40	16	5	10	3	50	19	24	175	16	0.00311163	0.00124465	0.000388954	0.000777907	0.000233372	0.00388954	0.00147802	0.00186698	0.0136134	0.00124465
RAPGEF3	4.08746	3	4.80735	2.58496	3.45943	5.64386	5.39232	5.55459	5.35755	3.45943	16	7	27	5	10	49	41	46	40	10	0.000484907	0.000212147	0.000818281	0.000151534	0.000303067	0.00148503	0.00124257	0.00139411	0.00121227	0.000303067
PTHLH	3.58496	2.32193	4.08746	2	2.32193	5.58496	5.45943	4.64386	4.52356	4.39232	11	4	16	3	4	47	43	24	22	20	0.00168789	0.000613779	0.00245512	0.000460335	0.000613779	0.00721191	0.00659813	0.00368268	0.00337579	0.0030689
ADAMTS1	3.45943	2.80735	3.90689	4.16993	3	5.49185	6.96578	5.2854	4.70044	3.32193	10	6	14	17	7	44	124	38	25	9	0.00150173	0.000901036	0.00210242	0.00255294	0.00105121	0.0066076	0.0186214	0.00570656	0.00375432	0.00135155
ATF3	2.58496	4.90689	3.70044	2.58496	5.42626	4.70044	5.83289	7.58496	6.30378	4	5	29	12	5	42	25	56	191	78	15	0.00174338	0.0101116	0.0041841	0.00174338	0.0146444	0.00871688	0.0195258	0.0665969	0.0271967	0.00523013
FGA	2.58496	3.80735	5.08746	4	3	4.24793	5.85798	6.71425	5.90689	3	5	13	33	15	7	18	57	104	59	7	0.00137969	0.0035872	0.00910596	0.00413907	0.00193157	0.00496689	0.0157285	0.0286976	0.0162804	0.00193157
UGT2B11	4.16993	1.58496	2.58496	6.08746	4.52356	2.58496	6.52356	6.64386	6.87036	6.70044	17	2	5	67	22	5	91	99	116	103	0.00590073	0.000694203	0.00173551	0.0232558	0.00763624	0.00173551	0.0315863	0.0343631	0.0402638	0.0357515
ACAP1	4.08746	5.12928	5.16993	3.32193	4.52356	6.42626	6.84549	5.58496	4.90689	4.90689	16	34	35	9	22	85	114	47	29	29	0.00185507	0.00394203	0.00405797	0.00104348	0.00255072	0.00985507	0.0132174	0.00544928	0.00336232	0.00336232
RNF144B	4.08746	4.16993	5.12928	2	5.52356	5.83289	5.24793	5.70044	5.97728	5.72792	16	17	34	3	45	56	37	51	62	52	0.00258106	0.00274238	0.00548476	0.000483949	0.00725924	0.00903372	0.0059687	0.00822713	0.0100016	0.00838845
CTD-2020K17.4	2.58496	5	3.45943	1.58496	4.90689	6.59991	5.70044	4.32193	5.67243	4.52356	5	31	10	2	29	96	51	19	50	22	0.00139353	0.00863991	0.00278707	0.000557414	0.0080825	0.0267559	0.014214	0.00529543	0.0139353	0.00613155
RP11-941H19.2	3.58496	3.45943	4.70044	3.32193	5.32193	7.85175	4.85798	4.08746	5.24793	6.9542	11	10	25	9	39	230	28	16	37	123	0.00919732	0.0083612	0.020903	0.00752508	0.0326087	0.192308	0.0234114	0.0133779	0.0309365	0.102843
COPG2	4.16993	5.32193	3.32193	3.32193	5.04439	7.15987	4.52356	4.9542	4.45943	6.58496	17	39	9	9	32	142	22	30	21	95	0.00422886	0.00970149	0.00223881	0.00223881	0.0079602	0.0353234	0.00547264	0.00746269	0.00522388	0.0236318
CST6	5.83289	4.52356	3.80735	5.2854	3.90689	8.55459	6.14975	5.32193	7.53138	4.39232	56	22	13	38	14	375	70	39	184	20	0.0430438	0.0169101	0.00999231	0.0292083	0.010761	0.28824	0.0538048	0.0299769	0.14143	0.0153728
UBD	5.24793	3.58496	4.90689	4.32193	3.16993	8.40514	7.09803	2.80735	7.12928	4.58496	37	11	29	19	8	338	136	6	139	23	0.0237028	0.00704676	0.0185778	0.0121717	0.00512492	0.216528	0.0871236	0.00384369	0.0890455	0.0147341
EFEMP1	6.62936	5.08746	3.32193	3.58496	2	7.12928	6.72792	5.64386	6.30378	6.39232	98	33	9	11	3	139	105	49	78	83	0.0155556	0.0052381	0.00142857	0.00174603	0.00047619	0.0220635	0.0166667	0.00777778	0.012381	0.0131746
SNORD3B-1	2.58496	3.45943	5.2854	3.70044	4.52356	7.8009	2	4.70044	6.18982	7	5	10	38	12	22	222	3	25	72	127	0.0020903	0.0041806	0.0158863	0.00501672	0.00919732	0.0928094	0.00125418	0.0104515	0.0301003	0.0530936
SNORD3C	1.58496	3	4.39232	4.16993	4.58496	7.24793	1	4.52356	5.39232	6.49185	2	7	20	17	23	151	1	22	41	89	0.00083612	0.00292642	0.0083612	0.00710702	0.00961538	0.0631271	0.00041806	0.00919732	0.0171405	0.0372074
RP11-307I14.2	1.58496	3.45943	5.08746	4	6.10852	8.59246	2	3.90689	5.04439	7.01123	2	10	33	15	68	385	3	14	32	128	0.00167224	0.0083612	0.027592	0.0125418	0.0568562	0.321906	0.00250836	0.0117057	0.0267559	0.107023
RP11-816J6.3	2.32193	2.32193	3.45943	2.58496	5.64386	7.7879	2.32193	3	5.70044	7.37504	4	4	10	5	49	220	4	7	51	165	0.00334448	0.00334448	0.0083612	0.0041806	0.0409699	0.183946	0.00334448	0.00585284	0.0426421	0.13796
MIR663A	2	4.52356	5.55459	4.39232	5.61471	7.69349	3.32193	4.64386	6.30378	7.24793	3	22	46	20	48	206	9	24	78	151	0.000589391	0.0043222	0.00903733	0.00392927	0.00943026	0.0404715	0.00176817	0.00471513	0.0153242	0.029666
MTND6P4	1.58496	3.70044	4.08746	3.80735	4.24793	7.05528	3.45943	5.32193	4.85798	6.91886	2	12	16	13	18	132	10	39	28	120	0.00167224	0.0100334	0.0133779	0.0108696	0.0150502	0.110368	0.0083612	0.0326087	0.0234114	0.100334
BEX5	3.32193	4.24793	3.80735	2.80735	5.39232	7.54689	2.58496	6.75489	5.49185	6.06609	9	18	13	6	41	186	5	107	44	66	0.003443	0.006886	0.00497322	0.00229533	0.0156848	0.0711553	0.00191278	0.0409334	0.0168324	0.0252487
TCTE1	1.58496	2.80735	3.32193	2.58496	3	0	0	2.58496	0	0	2	6	9	5	7	0	0	5	0	0	0.000759301	0.0022779	0.00341686	0.00189825	0.00265756	0	0	0.00189825	0	0
LNP1	1	3	3	2.32193	3.45943	0	0	2	0	0	1	7	7	4	10	0	0	3	0	0	0.000340483	0.00238338	0.00238338	0.00136193	0.00340483	0	0	0.00102145	0	0
RP11-245J9.4	1	3	3	3.45943	2	0	0	1.58496	0	0	1	7	7	10	3	0	0	2	0	0	0.00083612	0.00585284	0.00585284	0.0083612	0.00250836	0	0	0.00167224	0	0
RP11-400G3.3	1.58496	1.58496	2.32193	3.45943	2.80735	0	0	1.58496	1	0	2	2	4	10	6	0	0	2	1	0	0.00167224	0.00167224	0.00334448	0.0083612	0.00501672	0	0	0.00167224	0.00083612	0
CES4A	3.16993	3.80735	2	3.32193	3	1	0	1	0	1	8	13	3	9	7	1	0	1	0	1	0.000608596	0.000988969	0.000228224	0.000684671	0.000532522	7.60746e-05	0	7.60746e-05	0	7.60746e-05
AC022498.1	2.32193	3.32193	1	3.80735	2.58496	0	0	1.58496	0	1	4	9	1	13	5	0	0	2	0	1	0.00177699	0.00399822	0.000444247	0.00577521	0.00222124	0	0	0.000888494	0	0.000444247
ZNF503-AS1	2.32193	3.90689	4.08746	3.32193	2.32193	0	0	2.80735	2	1	4	14	16	9	4	0	0	6	3	1	0.000785392	0.00274887	0.00314157	0.00176713	0.000785392	0	0	0.00117809	0.000589044	0.000196348
RP11-312B8.1	2	3.58496	3.70044	2.58496	3.16993	1	0	3.45943	1	0	3	11	12	5	8	1	0	10	1	0	0.00250836	0.00919732	0.0100334	0.0041806	0.00668896	0.00083612	0	0.0083612	0.00083612	0
SLC14A1	0	4.80735	3.45943	3.45943	3.16993	1.58496	1	2.32193	1	0	0	27	10	10	8	2	1	4	1	0	0	0.00217216	0.000804505	0.000804505	0.000643604	0.000160901	8.04505e-05	0.000321802	8.04505e-05	0
AGAP1-IT1	1	4.24793	3.32193	3	3.16993	0	2.58496	2.32193	0	0	1	18	9	7	8	0	5	4	0	0	0.00083612	0.0150502	0.00752508	0.00585284	0.00668896	0	0.0041806	0.00334448	0	0
TVP23CP1	1	3	2.58496	3.58496	3	0	2	2	0	1	1	7	5	11	7	0	3	3	0	1	0.00083612	0.00585284	0.0041806	0.00919732	0.00585284	0	0.00250836	0.00250836	0	0.00083612
SOWAHD	1.58496	2.80735	4.45943	3	4	0	2.58496	1.58496	0	1.58496	2	6	21	7	15	0	5	2	0	2	0.00126183	0.00378549	0.0132492	0.0044164	0.00946372	0	0.00315457	0.00126183	0	0.00126183
CTA-357J21.1	2.58496	3.90689	2	3.45943	2.58496	0	2.32193	1	0	1	5	14	3	10	5	0	4	1	0	1	0.0041806	0.0117057	0.00250836	0.0083612	0.0041806	0	0.00334448	0.00083612	0	0.00083612
CBX3P2	3	3	2.32193	2	3.32193	0	2.32193	2	0	0	7	7	4	3	9	0	4	3	0	0	0.00195095	0.00195095	0.00111483	0.00083612	0.00250836	0	0.00111483	0.00083612	0	0
CNTNAP2	2.80735	3.16993	3.80735	3.32193	3.32193	0	0	0	0	2.58496	6	8	13	9	9	0	0	0	0	5	0.000771803	0.00102907	0.00167224	0.00115771	0.00115771	0	0	0	0	0.00064317
RP11-416I2.1	2.32193	2.80735	3.80735	2.58496	3	1	0	0	0	2.58496	4	6	13	5	7	1	0	0	0	5	0.00334448	0.00501672	0.0108696	0.0041806	0.00585284	0.00083612	0	0	0	0.0041806
RP11-20G6.3	2.80735	2	2	3.45943	2.80735	0	2	0	2	1	6	3	3	10	6	0	3	0	3	1	0.00501672	0.00250836	0.00250836	0.0083612	0.00501672	0	0.00250836	0	0.00250836	0.00083612
ATP6V0E2-AS1	2	1.58496	3.45943	2.58496	2	0	0	0	2	0	3	2	10	5	3	0	0	0	3	0	0.00121605	0.000810701	0.00405351	0.00202675	0.00121605	0	0	0	0.00121605	0
VWCE	1	1	4.08746	1.58496	3.32193	1	0	0	0	0	1	1	16	2	9	1	0	0	0	0	4.21567e-05	4.21567e-05	0.000674508	8.43135e-05	0.000379411	4.21567e-05	0	0	0	0
RP11-711K1.8	0	2.32193	2.32193	1.58496	3.45943	0	0	0	0	0	0	4	4	2	10	0	0	0	0	0	0	0.00334448	0.00334448	0.00167224	0.0083612	0	0	0	0	0
CTA-363E6.2	1	2	3.45943	2.32193	4.52356	0	2.80735	0	0	0	1	3	10	4	22	0	6	0	0	0	0.00041806	0.00125418	0.0041806	0.00167224	0.00919732	0	0.00250836	0	0	0
CELSR3	3.70044	3.45943	2.32193	2.80735	3.16993	0	0	3.58496	0	1.58496	12	10	4	6	8	0	0	11	0	2	0.00290698	0.00242248	0.000968992	0.00145349	0.00193798	0	0	0.00266473	0	0.000484496
RP11-449P15.2	3.32193	2	2.58496	4.39232	3.80735	0	0	2.80735	0	1.58496	9	3	5	20	13	0	0	6	0	2	0.00752508	0.00250836	0.0041806	0.0167224	0.0108696	0	0	0.00501672	0	0.00167224
LINC00479	3.32193	4	4.08746	4	4.16993	0	0	3.16993	0	0	9	15	16	15	17	0	0	8	0	0	0.00250836	0.0041806	0.00445931	0.0041806	0.00473802	0	0	0.00222965	0	0
RP11-379K22.3	3.58496	2.32193	4.52356	3	3.16993	0	2.32193	2	0	1.58496	11	4	22	7	8	0	4	3	0	2	0.00919732	0.00334448	0.0183946	0.00585284	0.00668896	0	0.00334448	0.00250836	0	0.00167224
RP11-543D5.2	3.58496	1	4.45943	3.32193	2.32193	0	1	2.58496	0	1	11	1	21	9	4	0	1	5	0	1	0.00919732	0.00083612	0.0175585	0.00752508	0.00334448	0	0.00083612	0.0041806	0	0.00083612
SCUBE2	2.58496	3.58496	4.16993	4.70044	0	1	0	3.32193	0	0	5	11	17	25	0	1	0	9	0	0	0.000433651	0.000954033	0.00147441	0.00216826	0	8.67303e-05	0	0.000780572	0	0
CTD-2017D11.1	2.58496	3	4.52356	4.45943	0	0	0	2.32193	0	0	5	7	22	21	0	0	0	4	0	0	0.0020903	0.00292642	0.00919732	0.00877926	0	0	0	0.00167224	0	0
RP11-434C1.1	2.58496	1	2.32193	2.58496	4.08746	0	1	1.58496	0	0	5	1	4	5	16	0	1	2	0	0	0.00139353	0.000278707	0.00111483	0.00139353	0.00445931	0	0.000278707	0.000557414	0	0
CTB-178M22.2	1.58496	0	3.32193	2.32193	3.32193	0	0	1.58496	0	0	2	0	9	4	9	0	0	2	0	0	0.00167224	0	0.00752508	0.00334448	0.00752508	0	0	0.00167224	0	0
NR1H4	2.32193	1	2.58496	2.80735	2.58496	0	0	0	0	1	4	1	5	6	5	0	0	0	0	1	0.000432479	0.00010812	0.000540599	0.000648719	0.000540599	0	0	0	0	0.00010812
USP18	2.32193	0	2.58496	3.58496	2.58496	1	0	0	0	0	4	0	5	11	5	1	0	0	0	0	0.00225225	0	0.00281532	0.00619369	0.00281532	0.000563063	0	0	0	0
RP11-486A14.1	3.58496	0	2	4.39232	2	0	0	2.32193	0	0	11	0	3	20	3	0	0	4	0	0	0.00459866	0	0.00125418	0.0083612	0.00125418	0	0	0.00167224	0	0
RP11-462G2.1	3	2.32193	3.16993	1.58496	0	0	0	1	0	0	7	4	8	2	0	0	0	1	0	0	0.00585284	0.00334448	0.00668896	0.00167224	0	0	0	0.00083612	0	0
RP11-282O18.3	2.80735	2.32193	2	2	0	0	1	0	0	0	6	4	3	3	0	0	1	0	0	0	0.00125418	0.00083612	0.00062709	0.00062709	0	0	0.00020903	0	0	0
RNF157-AS1	2.32193	2.32193	3.45943	3.32193	0	0	0	0	0	0	4	4	10	9	0	0	0	0	0	0	0.00110558	0.00110558	0.00276396	0.00248756	0	0	0	0	0	0
KLHL14	1	2.58496	2.32193	2	0	0	0	0	0	0	1	5	4	3	0	0	0	0	0	0	0.0001657	0.0008285	0.0006628	0.0004971	0	0	0	0	0	0
RP11-214O1.2	1	2.32193	3.32193	1	0	0	0	0	0	0	1	4	9	1	0	0	0	0	0	0	0.00083612	0.00334448	0.00752508	0.00083612	0	0	0	0	0	0
SALL1	3.90689	2.32193	3.16993	0	0	0	0	0	0	0	14	4	8	0	0	0	0	0	0	0	0.0035524	0.00101497	0.00202994	0	0	0	0	0	0	0
GRIN3B	2.32193	3	3.16993	0	0	0	0	0	0	0	4	7	8	0	0	0	0	0	0	0	0.00158604	0.00277557	0.00317209	0	0	0	0	0	0	0
RP11-326C3.7	2.58496	1	4.52356	0	0	0	0	0	0	0	5	1	22	0	0	0	0	0	0	0	0.0041806	0.00083612	0.0183946	0	0	0	0	0	0	0
KCNN1	2.32193	1	3.32193	0	1	0	0	0	0	0	4	1	9	0	1	0	0	0	0	0	0.000760167	0.000190042	0.00171038	0	0.000190042	0	0	0	0	0
KCNS1	1.58496	0	3.90689	1.58496	0	0	0	0	0	0	2	0	14	2	0	0	0	0	0	0	0.000532481	0	0.00372737	0.000532481	0	0	0	0	0	0
PGF	1.58496	2.32193	3.16993	1	1.58496	0	0	1	0	0	2	4	8	1	2	0	0	1	0	0	0.000353607	0.000707214	0.00141443	0.000176803	0.000353607	0	0	0.000176803	0	0
SYNC	1	2	3	1	2	0	0	1	0	0	1	3	7	1	3	0	0	1	0	0	0.000227583	0.000682749	0.00159308	0.000227583	0.000682749	0	0	0.000227583	0	0
RP11-10K16.1	1.58496	2.58496	3.16993	1	1.58496	0	0	0	0	0	2	5	8	1	2	0	0	0	0	0	0.000557414	0.00139353	0.00222965	0.000278707	0.000557414	0	0	0	0	0
KCNQ4	1.58496	2.80735	3	0	1.58496	0	0	1	0	0	2	6	7	0	2	0	0	1	0	0	0.00064	0.00192	0.00224	0	0.00064	0	0	0.00032	0	0
C1orf177	1.58496	2.32193	2.58496	0	3	0	0	0	0	0	2	4	5	0	7	0	0	0	0	0	0.000748223	0.00149645	0.00187056	0	0.00261878	0	0	0	0	0
RPS6KA6	2.80735	3.32193	3.32193	0	2	0	0	1.58496	0	0	6	9	9	0	3	0	0	2	0	0	0.00154281	0.00231422	0.00231422	0	0.000771407	0	0	0.000514271	0	0
RP4-798A10.7	3.32193	1	3.90689	0	2.58496	0	1	1	0	0	9	1	14	0	5	0	1	1	0	0	0.00752508	0.00083612	0.0117057	0	0.0041806	0	0.00083612	0.00083612	0	0
RP11-707O23.5	1	1	3.80735	3	1.58496	0	0	1	0	0	1	1	13	7	2	0	0	1	0	0	0.00083612	0.00083612	0.0108696	0.00585284	0.00167224	0	0	0.00083612	0	0
LINC00574	0	0	3.80735	2.80735	1.58496	0	0	0	0	0	0	0	13	6	2	0	0	0	0	0	0	0	0.0108696	0.00501672	0.00167224	0	0	0	0	0
PRSS21	0	0	6.44294	1	2.32193	0	0	1	0	0	0	0	86	1	4	0	0	1	0	0	0	0	0.0152347	0.000177148	0.000708592	0	0	0.000177148	0	0
FOXD2	3.70044	4.39232	4.70044	3.45943	3.32193	0	2.58496	4	2.32193	0	12	20	25	10	9	0	5	15	4	0	0.00580552	0.00967586	0.0120948	0.00483793	0.00435414	0	0.00241896	0.00725689	0.00193517	0
CENPVP1	4.08746	3.45943	3.80735	3.32193	2.58496	0	3.45943	1.58496	2.80735	0	16	10	13	9	5	0	10	2	6	0	0.00668896	0.0041806	0.00543478	0.00376254	0.0020903	0	0.0041806	0.00083612	0.00250836	0
PINLYP	3.58496	4.70044	4.64386	2	2	1	2	2.80735	2.32193	0	11	25	24	3	3	1	3	6	4	0	0.00298022	0.00677323	0.0065023	0.000812788	0.000812788	0.000270929	0.000812788	0.00162558	0.00108372	0
SLC13A3	3.90689	3.45943	5.39232	2	1	0	2	2.80735	2.32193	0	14	10	41	3	1	0	3	6	4	0	0.001412	0.00100857	0.00413515	0.000302572	0.000100857	0	0.000302572	0.000605144	0.000403429	0
IL1RL1	2.32193	4.64386	4.16993	3	4.58496	0	1	2	3.70044	0	4	24	17	7	23	0	1	3	12	0	0.000350018	0.00210011	0.00148757	0.000612531	0.0020126	0	8.75044e-05	0.000262513	0.00105005	0
GSTA1	2	2.58496	5.12928	3.45943	4.58496	0	1	2	3	0	3	5	34	10	23	0	1	3	7	0	0.00116009	0.00193349	0.0131477	0.00386698	0.00889404	0	0.000386698	0.00116009	0.00270688	0
SLC6A12	4.70044	3.45943	5.24793	3	1.58496	1	1	1	4.24793	0	25	10	37	7	2	1	1	1	18	0	0.00191131	0.000764526	0.00282875	0.000535168	0.000152905	7.64526e-05	7.64526e-05	7.64526e-05	0.00137615	0
PTGER2	3.16993	3.80735	3.70044	3.45943	0	0	0	0	2.80735	1	8	13	12	10	0	0	0	0	6	1	0.00340716	0.00553663	0.00511073	0.00425894	0	0	0	0	0.00255537	0.000425894
RGN	2.58496	1.58496	3.32193	2	1.58496	1	1	1	0	0	5	2	9	3	2	1	1	1	0	0	0.00181291	0.000725163	0.00326323	0.00108774	0.000725163	0.000362582	0.000362582	0.000362582	0	0
TUBA8	2.80735	2	2.32193	2.32193	1.58496	0	1	1	0	0	6	3	4	4	2	0	1	1	0	0	0.00125865	0.000629327	0.000839102	0.000839102	0.000419551	0	0.000209776	0.000209776	0	0
CTD-3193O13.9	3	1.58496	3.16993	1.58496	2	1	0	0	0	0	7	2	8	2	3	1	0	0	0	0	0.00463576	0.0013245	0.00529801	0.0013245	0.00198675	0.000662252	0	0	0	0
C7orf31	3.45943	2.58496	2.32193	1.58496	2.32193	1.58496	0	1.58496	0	0	10	5	4	2	4	2	0	2	0	0	0.00165044	0.000825219	0.000660175	0.000330087	0.000660175	0.000330087	0	0.000330087	0	0
OACYLP	3	2.32193	1	1.58496	1	1	0	0	0	0	7	4	1	2	1	1	0	0	0	0	0.00193424	0.00110528	0.000276319	0.000552639	0.000276319	0.000276319	0	0	0	0
RASSF9	2.58496	2.32193	1	1	2	0	0	1	0	0	5	4	1	1	3	0	0	1	0	0	0.00371747	0.00297398	0.000743494	0.000743494	0.00223048	0	0	0.000743494	0	0
CA14	3.45943	3.70044	3.32193	2	2.58496	0	0	1.58496	0	0	10	12	9	3	5	0	0	2	0	0	0.00101812	0.00122175	0.00091631	0.000305437	0.000509061	0	0	0.000203625	0	0
ACRC	2.80735	3.70044	2.58496	2.80735	1	0	0	1	0	0	6	12	5	6	1	0	0	1	0	0	0.00311688	0.00623377	0.0025974	0.00311688	0.000519481	0	0	0.000519481	0	0
CYP3A4	2.58496	2	3.32193	1.58496	2.32193	0	1	1	1	1	5	3	9	2	4	0	1	1	1	1	0.00105485	0.000632911	0.00189873	0.000421941	0.000843882	0	0.00021097	0.00021097	0.00021097	0.00021097
BMS1P9	1.58496	2.58496	2.58496	2.32193	2	0	1	1.58496	0	1	2	5	5	4	3	0	1	2	0	1	0.00167224	0.0041806	0.0041806	0.00334448	0.00250836	0	0.00083612	0.00167224	0	0.00083612
NEURL2	2.32193	3.80735	2.32193	2.58496	2.58496	2.32193	1	0	0	0	4	13	4	5	5	4	1	0	0	0	0.00282686	0.00918728	0.00282686	0.00353357	0.00353357	0.00282686	0.000706714	0	0	0
BRSK2	2.58496	3	2	2	2.32193	1	2	0	0	0	5	7	3	3	4	1	3	0	0	0	0.000273658	0.000383121	0.000164195	0.000164195	0.000218926	5.47315e-05	0.000164195	0	0	0
DIO1	2	5.16993	2.32193	2	0	0	1	0	0	0	3	35	4	3	0	0	1	0	0	0	0.000418819	0.00488622	0.000558425	0.000418819	0	0	0.000139606	0	0	0
FBLL1	2	4.52356	0	1.58496	2	0	1	1	0	0	3	22	0	2	3	0	1	1	0	0	0.00266904	0.019573	0	0.00177936	0.00266904	0	0.00088968	0.00088968	0	0
SULT4A1	4.70044	1.58496	0	4.24793	0	0	0	0	1	0	25	2	0	18	0	0	0	0	1	0	0.00261178	0.000208943	0	0.00188048	0	0	0	0	0.000104471	0
LUM	5.49185	2.32193	0	2.32193	0	0	0	0	0	0	44	4	0	4	0	0	0	0	0	0	0.0161054	0.00146413	0	0.00146413	0	0	0	0	0	0
UCHL1	3.16993	1	1	3.45943	1	0	0	0	0	1	8	1	1	10	1	0	0	0	0	1	0.000831342	0.000103918	0.000103918	0.00103918	0.000103918	0	0	0	0	0.000103918
PALMD	2.32193	2.32193	1	3.90689	0	0	0	0	0	0	4	4	1	14	0	0	0	0	0	0	0.000946074	0.000946074	0.000236518	0.00331126	0	0	0	0	0	0
RP11-317J10.2	2.58496	3	0	3.32193	3	0	0	1.58496	0	0	5	7	0	9	7	0	0	2	0	0	0.00193199	0.00270479	0	0.00347759	0.00270479	0	0	0.000772798	0	0
C12orf60	2.58496	2.58496	0	3	3.90689	0	0	1	0	0	5	5	0	7	14	0	0	1	0	0	0.00114129	0.00114129	0	0.00159781	0.00319562	0	0	0.000228258	0	0
TIMP4	2	2.32193	1	2.58496	4.39232	0	0	1.58496	0	1	3	4	1	5	20	0	0	2	0	1	0.00180723	0.00240964	0.00060241	0.00301205	0.0120482	0	0	0.00120482	0	0.00060241
CYP2C19	2.58496	1	0	2.32193	4.16993	0	0	1	0	0	5	1	0	4	17	0	0	1	0	0	0.00182615	0.00036523	0	0.00146092	0.00620891	0	0	0.00036523	0	0
FHAD1	1	1	0	2.80735	4	0	0	1	0	0	1	1	0	6	15	0	0	1	0	0	5.90912e-05	5.90912e-05	0	0.000354547	0.000886368	0	0	5.90912e-05	0	0
ZNF239	1.58496	2.80735	1	2	4.08746	0	1	0	1	0	2	6	1	3	16	0	1	0	1	0	0.000727008	0.00218103	0.000363504	0.00109051	0.00581607	0	0.000363504	0	0.000363504	0
DNAH12	1.58496	3	0	2.58496	3.45943	0	0	0	0	0	2	7	0	5	10	0	0	0	0	0	0.000225861	0.000790514	0	0.000564653	0.00112931	0	0	0	0	0
C11orf86	2.80735	2.32193	0	0	3.45943	0	0	0	0	0	6	4	0	0	10	0	0	0	0	0	0.0030785	0.00205233	0	0	0.00513084	0	0	0	0	0
RAET1G	2.58496	2	0	0	3.58496	0	0	0	0	0	5	3	0	0	11	0	0	0	0	0	0.00125345	0.000752068	0	0	0.00275758	0	0	0	0	0
GCK	2.80735	1.58496	0	0	3	0	0	0	0	0	6	2	0	0	7	0	0	0	0	0	0.00134801	0.000449337	0	0	0.00157268	0	0	0	0	0
RP11-551L14.4	2.32193	3	0	0	2.58496	0	0	0	0	0	4	7	0	0	5	0	0	0	0	0	0.00111483	0.00195095	0	0	0.00139353	0	0	0	0	0
CIDEC	3.32193	3.80735	5.08746	4	4.32193	2.32193	2	1.58496	0	2.58496	9	13	33	15	19	4	3	2	0	5	0.00320057	0.00462304	0.0117354	0.00533428	0.00675676	0.00142248	0.00106686	0.000711238	0	0.00177809
LINC00472	2.58496	3.70044	5.12928	2.80735	4.32193	1.58496	2.58496	2.80735	0	2.32193	5	12	34	6	19	2	5	6	0	4	0.000823316	0.00197596	0.00559855	0.00098798	0.0031286	0.000329327	0.000823316	0.00098798	0	0.000658653
SIMC1	3.80735	4.08746	5	2.58496	4.9542	3.32193	2.58496	2.80735	1	2.80735	13	16	31	5	30	9	5	6	1	6	0.00142357	0.00175208	0.00339466	0.000547525	0.00328515	0.000985545	0.000547525	0.00065703	0.000109505	0.00065703
GMDS-AS1	2.80735	3	4.08746	4.70044	5.2854	2.80735	2.32193	3.32193	2	1	6	7	16	25	38	6	4	9	3	1	0.00041385	0.000482825	0.0011036	0.00172438	0.00262105	0.00041385	0.0002759	0.000620775	0.000206925	6.8975e-05
RUSC2	4.24793	4.08746	3.90689	3.58496	3.90689	2.58496	2.32193	3	1	0	18	16	14	11	14	5	4	7	1	0	0.00618982	0.00550206	0.00481431	0.00378267	0.00481431	0.00171939	0.00137552	0.00240715	0.000343879	0
C2CD4A	3.32193	4.32193	6.24793	4.52356	3.58496	1	2.80735	3	0	2.32193	9	19	75	22	11	1	6	7	0	4	0.00265487	0.00560472	0.0221239	0.00648968	0.00324484	0.000294985	0.00176991	0.0020649	0	0.00117994
RNF157	2	4.75489	4.39232	4.45943	3	1	3.45943	2.58496	1	2	3	26	20	21	7	1	10	5	1	3	0.00026476	0.00229459	0.00176507	0.00185332	0.000617774	8.82535e-05	0.000882535	0.000441267	8.82535e-05	0.00026476
KCNH3	2.58496	1	4.90689	4.90689	4.80735	3	3.16993	0	0	2.32193	5	1	29	29	27	7	8	0	0	4	0.000972952	0.00019459	0.00564312	0.00564312	0.00525394	0.00136213	0.00155672	0	0	0.000778362
GATA5	3.32193	3.70044	4.90689	3.70044	2	3.70044	0	1	1	2	9	12	29	12	3	12	0	1	1	3	0.0035503	0.00473373	0.0114398	0.00473373	0.00118343	0.00473373	0	0.000394477	0.000394477	0.00118343
CDHR3	2.80735	2.80735	3.70044	3	2	2.32193	0	1.58496	1	1	6	6	12	7	3	4	0	2	1	1	0.000368981	0.000368981	0.000737962	0.000430478	0.00018449	0.000245987	0	0.000122994	6.14968e-05	6.14968e-05
UPF3AP2	2.80735	2.58496	3.45943	3.70044	3.45943	2.32193	0	2.32193	0	2.32193	6	5	10	12	10	4	0	4	0	4	0.00250627	0.00208855	0.00417711	0.00501253	0.00417711	0.00167084	0	0.00167084	0	0.00167084
RP11-73M18.7	2.58496	2.32193	3.16993	3.80735	3.90689	2.58496	0	2	0	1.58496	5	4	8	13	14	5	0	3	0	2	0.0041806	0.00334448	0.00668896	0.0108696	0.0117057	0.0041806	0	0.00250836	0	0.00167224
SLC11A1	2.58496	4.08746	3.90689	3	3.58496	3.45943	2.32193	0	0	1	5	16	14	7	11	10	4	0	0	1	0.000251332	0.000804263	0.00070373	0.000351865	0.000552931	0.000502664	0.000201066	0	0	5.02664e-05
COL4A1	5.42626	4.08746	3.32193	5.12928	2.80735	2.32193	0	0	0	1.58496	42	16	9	34	6	4	0	0	0	2	0.00594985	0.00226661	0.00127497	0.00481655	0.000849979	0.000566653	0	0	0	0.000283326
RP11-96C23.5	3.16993	4.80735	3	4	3.58496	1	3.80735	0	2.80735	1	8	27	7	15	11	1	13	0	6	1	0.00668896	0.0225753	0.00585284	0.0125418	0.00919732	0.00083612	0.0108696	0	0.00501672	0.00083612
AGAP11	3.16993	4.80735	3	4	3.58496	1	3.80735	0	2.80735	1	8	27	7	15	11	1	13	0	6	1	0.00668896	0.0225753	0.00585284	0.0125418	0.00919732	0.00083612	0.0108696	0	0.00501672	0.00083612
RP11-96C23.11	3.16993	4.75489	3	4	3.58496	1	3.80735	0	2.80735	1	8	26	7	15	11	1	13	0	6	1	0.00668896	0.0217391	0.00585284	0.0125418	0.00919732	0.00083612	0.0108696	0	0.00501672	0.00083612
METTL21B	2	5.35755	4.08746	3.45943	3.45943	1	2.80735	1	2	0	3	40	16	10	10	1	6	1	3	0	0.000644192	0.00858922	0.00343569	0.00214731	0.00214731	0.000214731	0.00128838	0.000214731	0.000644192	0
TMEM27	4.58496	3.80735	3	4.45943	2.80735	1	3.58496	1.58496	0	1	23	13	7	21	6	1	11	2	0	1	0.0124392	0.00703083	0.00378583	0.0113575	0.003245	0.000540833	0.00594916	0.00108167	0	0.000540833
SMIM2-AS1	3.58496	3.45943	3.32193	3.32193	3.32193	1.58496	4	0	0	0	11	10	9	9	9	2	15	0	0	0	0.00459866	0.0041806	0.00376254	0.00376254	0.00376254	0.00083612	0.0062709	0	0	0
PDZK1	4.39232	3.80735	3.90689	4.52356	1.58496	0	3.45943	1.58496	0	2.58496	20	13	14	22	2	0	10	2	0	5	0.00703482	0.00457263	0.00492438	0.0077383	0.000703482	0	0.00351741	0.000703482	0	0.00175871
SHANK3	2.80735	3	3.80735	4.85798	2.58496	0	2.58496	2	0	3	6	7	13	28	5	0	5	3	0	7	0.00188561	0.00219987	0.00408548	0.0087995	0.00157134	0	0.00157134	0.000942803	0	0.00219987
ADRA2C	2.80735	4.39232	4.90689	4.08746	2	1	3.80735	0	1	2.32193	6	20	29	16	3	1	13	0	1	4	0.0035461	0.0118203	0.0171395	0.00945626	0.00177305	0.000591017	0.00768322	0	0.000591017	0.00236407
CNTN1	4.70044	3.45943	4.52356	3	2.80735	0	2	0	1	2.32193	25	10	22	7	6	0	3	0	1	4	0.00238983	0.000955932	0.00210305	0.000669152	0.000573559	0	0.000286779	0	9.55932e-05	0.000382373
USPL1	2.80735	3.32193	2.32193	4.90689	6.12928	1.58496	3.16993	3.45943	1	2.58496	6	9	4	29	69	2	8	10	1	5	0.00232108	0.00348162	0.00154739	0.0112186	0.0266925	0.000773694	0.00309478	0.00386847	0.000386847	0.00193424
AKR1B10P1	2.58496	4.16993	3.45943	4.52356	5.16993	0	3.58496	1	0	2.58496	5	17	10	22	35	0	11	1	0	5	0.0041806	0.014214	0.0083612	0.0183946	0.0292642	0	0.00919732	0.00083612	0	0.0041806
EPSTI1	4.16993	3	1	6.26679	4.24793	1.58496	3.32193	1.58496	2.32193	1	17	7	1	76	18	2	9	2	4	1	0.00133964	0.000551615	7.88022e-05	0.00598897	0.00141844	0.000157604	0.00070922	0.000157604	0.000315209	7.88022e-05
FAM35DP	4.08746	3.70044	4.90689	4.80735	4.58496	2.32193	2.80735	3	3.58496	3.32193	16	12	29	27	23	4	6	7	11	9	0.00668896	0.00501672	0.0121237	0.0112876	0.00961538	0.00167224	0.00250836	0.00292642	0.00459866	0.00376254
RP11-91G21.1	4.16993	4.08746	4.70044	3.90689	4.08746	2	3.80735	2.80735	2.80735	3.45943	17	16	25	14	16	3	13	6	6	10	0.014214	0.0133779	0.020903	0.0117057	0.0133779	0.00250836	0.0108696	0.00501672	0.00501672	0.0083612
TMEM231	4.52356	4.45943	4.45943	4.52356	4	3.45943	2.58496	2	3.16993	3	22	21	21	22	15	10	5	3	8	7	0.00273598	0.00261162	0.00261162	0.00273598	0.00186544	0.00124363	0.000621813	0.000373088	0.000994901	0.000870538
AGAP5	4	4.9542	4.64386	4.90689	3.58496	2.32193	4.08746	3.58496	2	3	15	30	24	29	11	4	16	11	3	7	0.00292512	0.00585023	0.00468019	0.00565523	0.00214509	0.000780031	0.00312012	0.00214509	0.000585023	0.00136505
RP11-464F9.1	4	4.85798	4.64386	4.90689	3.58496	2	4.08746	3.58496	2	3	15	28	24	29	11	3	16	11	3	7	0.0062709	0.0117057	0.0100334	0.0121237	0.00459866	0.00125418	0.00668896	0.00459866	0.00125418	0.00292642
IRAK2	4.39232	4.52356	3.90689	5.35755	4.58496	4.90689	3.16993	3.16993	2	1.58496	20	22	14	40	23	29	8	8	3	2	0.00737735	0.00811509	0.00516415	0.0147547	0.00848395	0.0106972	0.00295094	0.00295094	0.0011066	0.000737735
GRK4	4.90689	4.64386	4.52356	4.24793	2	4.08746	2.32193	2.58496	2.32193	2	29	24	22	18	3	16	4	5	4	3	0.0038431	0.00318049	0.00291545	0.00238537	0.000397562	0.00212033	0.000530082	0.000662603	0.000530082	0.000397562
RP11-541N10.3	5	5.2854	5	4.52356	3.45943	3.70044	2.58496	3.70044	4.24793	1	31	38	31	22	10	12	5	12	18	1	0.0259197	0.0317726	0.0259197	0.0183946	0.0083612	0.0100334	0.0041806	0.0100334	0.0150502	0.00083612
BPIFB1	5	4.08746	5.93074	4.52356	3.70044	3.80735	3.32193	3.16993	4.32193	0	31	16	60	22	12	13	9	8	19	0	0.00838064	0.00432549	0.0162206	0.00594755	0.00324412	0.00351446	0.00243309	0.00216275	0.00513652	0
SEC16B	4.70044	5.55459	4.45943	2.80735	3.16993	2.32193	4.08746	2.32193	3	1	25	46	21	6	8	4	16	4	7	1	0.000963986	0.00177373	0.000809748	0.000231357	0.000308475	0.000154238	0.000616951	0.000154238	0.000269916	3.85594e-05
FAM211A	5	3.90689	6.2854	4.90689	4.08746	3.70044	0	0	4.52356	3.80735	31	14	77	29	16	12	0	0	22	13	0.00730099	0.00329722	0.0181347	0.00682996	0.00376825	0.00282619	0	0	0.00518135	0.00306171
MMP24	4.70044	3.45943	4.9542	6.65821	2	2	1	3.58496	4.16993	3.45943	25	10	30	100	3	3	1	11	17	10	0.0069735	0.0027894	0.0083682	0.027894	0.00083682	0.00083682	0.00027894	0.00306834	0.00474198	0.0027894
CCDC74A	4.24793	4.24793	4.75489	4.08746	5	0	2	2.32193	0	3.58496	18	18	26	16	31	0	3	4	0	11	0.00165304	0.00165304	0.00238773	0.00146937	0.00284691	0	0.000275507	0.000367343	0	0.00101019
HPDL	4.39232	3.90689	4.70044	3.70044	4.08746	0	1	2	0	3	20	14	25	12	16	0	1	3	0	7	0.0141844	0.00992908	0.0177305	0.00851064	0.0113475	0	0.00070922	0.00212766	0	0.00496454
TM6SF2	3.32193	4.24793	4.52356	2.58496	4.70044	0	2.58496	3	0	3.45943	9	18	22	5	25	0	5	7	0	10	0.00334324	0.00668648	0.00817236	0.00185736	0.00928678	0	0.00185736	0.0026003	0	0.00371471
CYP1A1	3.16993	3.80735	5.88264	2	4.24793	0	1	0	0	5.16993	8	13	58	3	18	0	1	0	0	35	0.000849347	0.00138019	0.00615777	0.000318505	0.00191103	0	0.000106168	0	0	0.00371589
TMEM253	3	3.45943	5.32193	3.70044	4.90689	0	2.32193	1.58496	3.45943	4.08746	7	10	39	12	29	0	4	2	10	16	0.00170732	0.00243902	0.0095122	0.00292683	0.00707317	0	0.00097561	0.000487805	0.00243902	0.00390244
RP3-395M20.9	3.45943	4.08746	2	2.58496	4.75489	0	1	1.58496	2.80735	3	10	16	3	5	26	0	1	2	6	7	0.0083612	0.0133779	0.00250836	0.0041806	0.0217391	0	0.00083612	0.00167224	0.00501672	0.00585284
PAH	1.58496	5	5.9542	3.32193	6.53916	2	1	4.08746	3	2.58496	2	31	61	9	92	3	1	16	7	5	0.000119204	0.00184766	0.00363571	0.000536417	0.00548337	0.000178806	5.96019e-05	0.00095363	0.000417213	0.000298009
GKN2	3.90689	7.11894	3.16993	1.58496	7.52356	1.58496	1	3.32193	0	3.32193	14	138	8	2	183	2	1	9	0	9	0.00621118	0.0612245	0.00354925	0.000887311	0.081189	0.000887311	0.000443656	0.0039929	0	0.0039929
DNHD1	4.08746	5.32193	4.70044	2.32193	4.80735	0	4.08746	4.64386	0	0	16	39	25	4	27	0	16	24	0	0	0.000649482	0.00158311	0.00101482	0.000162371	0.001096	0	0.000649482	0.000974224	0	0
CTC-297N7.5	2.58496	4.16993	4.90689	1	4.64386	0	2.80735	3.80735	0	0	5	17	29	1	24	0	6	13	0	0	0.000811952	0.00276064	0.00470932	0.00016239	0.00389737	0	0.000974342	0.00211108	0	0
SULT1B1	2.80735	5	3.16993	1	6.12928	0	3.80735	2.32193	0	1	6	31	8	1	69	0	13	4	0	1	0.00063065	0.00325836	0.000840866	0.000105108	0.00725247	0	0.00136641	0.000420433	0	0.000105108
TMEM213	3	7.79442	4.45943	1.58496	2	0	1	4.45943	0	1	7	221	21	2	3	0	1	21	0	1	0.00095277	0.0300803	0.00285831	0.00027222	0.00040833	0	0.00013611	0.00285831	0	0.00013611
ODAM	1	5.49185	3.90689	0	3.45943	0	2.32193	1.58496	1	0	1	44	14	0	10	0	4	2	1	0	0.000115835	0.00509672	0.00162168	0	0.00115835	0	0.000463338	0.000231669	0.000115835	0
KCNH8	1	3.32193	4.80735	0	4.16993	0	0	1.58496	0	0	1	9	27	0	17	0	0	2	0	0	5.63603e-05	0.000507242	0.00152173	0	0.000958124	0	0	0.000112721	0	0
LINC00675	0	4.52356	2.58496	2.80735	6.10852	0	2.58496	2.32193	0	0	0	22	5	6	68	0	5	4	0	0	0	0.00919732	0.0020903	0.00250836	0.0284281	0	0.0020903	0.00167224	0	0
SPON1	2.32193	6.04439	3.45943	1.58496	4.24793	4.08746	0	2.32193	0	0	4	65	10	2	18	16	0	4	0	0	0.00111483	0.0181159	0.00278707	0.000557414	0.00501672	0.00445931	0	0.00111483	0	0
HHIP	2.58496	4.32193	4.16993	1	3.45943	3.32193	0	0	0	0	5	19	17	1	10	9	0	0	0	0	0.000362555	0.00137771	0.00123269	7.25111e-05	0.000725111	0.0006526	0	0	0	0
SULT1C2	2.58496	5.24793	0	3.90689	7.32193	0	1	1	0	1	5	37	0	14	159	0	1	1	0	1	0.00067331	0.00498249	0	0.00188527	0.0214113	0	0.000134662	0.000134662	0	0.000134662
CCNB3	4	4.52356	0	1.58496	4.90689	2	2	0	0	0	15	22	0	2	29	3	3	0	0	0	0.0015868	0.0023273	0	0.000211573	0.00306781	0.00031736	0.00031736	0	0	0
GKN1	2	6.90689	0	0	6.71425	0	0	1	0	0	3	119	0	0	104	0	0	1	0	0	0.00117971	0.0467951	0	0	0.0408966	0	0	0.000393236	0	0
RP11-23P13.6	2.58496	6.44294	1	0	3.58496	0	0	2	0	1	5	86	1	0	11	0	0	3	0	1	0.00208333	0.0358333	0.000416667	0	0.00458333	0	0	0.00125	0	0.000416667
PGC	6.37504	5.16993	3	0	7.3837	4.70044	2.58496	0	0	3.45943	82	35	7	0	166	25	5	0	0	10	0.0161991	0.00691426	0.00138285	0	0.0327934	0.00493876	0.000987752	0	0	0.0019755
IRF8	2	6.79442	6.04439	4.24793	0	3	2.58496	0	0	1.58496	3	110	65	18	0	7	5	0	0	2	0.00028177	0.0103315	0.00610501	0.00169062	0	0.000657462	0.000469616	0	0	0.000187846
SLC6A19	0	4.08746	7.52356	5.61471	2	1	2	0	0	0	0	16	183	48	3	1	3	0	0	0	0	0.0017288	0.0197731	0.00518639	0.000324149	0.00010805	0.000324149	0	0	0
MUC6	0	7.42626	8.71768	4.9542	0	4.32193	0	2.32193	2	0	0	171	420	30	0	19	0	4	3	0	0	0.0397952	0.0977426	0.00698162	0	0.00442169	0	0.000930882	0.000698162	0
GNA15	1	2.32193	0	0	1	4	2	4.39232	3.45943	2.32193	1	4	0	0	1	15	3	20	10	4	0.000125534	0.000502134	0	0	0.000125534	0.001883	0.000376601	0.00251067	0.00125534	0.000502134
RGMB-AS1	1	1.58496	0	0	1	3	2	2.80735	3.70044	3	1	2	0	0	1	7	3	6	12	7	0.00036846	0.00073692	0	0	0.00036846	0.00257922	0.00110538	0.00221076	0.00442152	0.00257922
IFITM1	2.32193	1.58496	0	0	0	5.49185	2.32193	3	4.9542	1	4	2	0	0	0	44	4	7	30	1	0.00265604	0.00132802	0	0	0	0.0292165	0.00265604	0.00464807	0.0199203	0.000664011
SLC16A14	1.58496	0	0	0	1.58496	4.90689	2	3	3	0	2	0	0	0	2	29	3	7	7	0	0.000329435	0	0	0	0.000329435	0.00477681	0.000494153	0.00115302	0.00115302	0
NKAPL	1	0	0	0	2	3.90689	1	3.32193	3	1.58496	1	0	0	0	3	14	1	9	7	2	0.000726216	0	0	0	0.00217865	0.010167	0.000726216	0.00653595	0.00508351	0.00145243
ICAM1	2	1	0	0	3.80735	5.97728	4.08746	3.16993	3.16993	3.32193	3	1	0	0	13	62	16	8	8	9	0.000590203	0.000196734	0	0	0.00255754	0.0121975	0.00314775	0.00157387	0.00157387	0.00177061
SENCR	2.32193	0	0	0	2.58496	6.02237	3.32193	2.32193	4	3.58496	4	0	0	0	5	64	9	4	15	11	0.00334448	0	0	0	0.0041806	0.0535117	0.00752508	0.00334448	0.0125418	0.00919732
SYNE1	3.16993	1	3	1	0	5.20945	3.16993	3	3.58496	2.80735	8	1	7	1	0	36	8	7	11	6	0.000220119	2.75149e-05	0.000192604	2.75149e-05	0	0.000990535	0.000220119	0.000192604	0.000302663	0.000165089
ZIK1	2	1.58496	2	0	0	4.08746	2.58496	2.80735	5.35755	3.16993	3	2	3	0	0	16	5	6	40	8	0.000490838	0.000327225	0.000490838	0	0	0.0026178	0.000818063	0.000981675	0.0065445	0.0013089
IL2RG	1	2.58496	3.32193	0	1.58496	5.20945	3.58496	3.16993	2.80735	2.58496	1	5	9	0	2	36	11	8	6	5	0.000157604	0.000788022	0.00141844	0	0.000315209	0.00567376	0.00173365	0.00126084	0.000945626	0.000788022
CCNA1	0	0	1	1	0	6.08746	3.32193	4.24793	3.45943	1.58496	0	0	1	1	0	67	9	18	10	2	0	0	0.000383289	0.000383289	0	0.0256803	0.0034496	0.0068992	0.00383289	0.000766577
DUSP10	4.08746	1.58496	0	2	1.58496	5.20945	4.39232	4.08746	2.32193	4.08746	16	2	0	3	2	36	20	16	4	16	0.00727603	0.000909504	0	0.00136426	0.000909504	0.0163711	0.00909504	0.00727603	0.00181901	0.00727603
ADAMTS14	3.32193	1	0	2.58496	1	5.42626	3.90689	4.08746	4	3.70044	9	1	0	5	1	42	14	16	15	12	0.00323276	0.000359195	0	0.00179598	0.000359195	0.0150862	0.00502874	0.00574713	0.00538793	0.00431034
CPE	3.80735	0	0	1	0	3.80735	3.80735	4.90689	2	3.45943	13	0	0	1	0	13	13	29	3	10	0.00230906	0	0	0.00017762	0	0.00230906	0.00230906	0.00515098	0.00053286	0.0017762
IQCG	3	1	0	3	2	2.58496	3.58496	4.64386	3.90689	4.32193	7	1	0	7	3	5	11	24	14	19	0.000686746	9.81065e-05	0	0.000686746	0.00029432	0.000490533	0.00107917	0.00235456	0.00137349	0.00186402
DCLK1	1.58496	3	1	3.32193	2.32193	7.22882	4.08746	3.70044	2.80735	3.32193	2	7	1	9	4	149	16	12	6	9	0.000198452	0.000694582	9.9226e-05	0.000893034	0.000396904	0.0147847	0.00158762	0.00119071	0.000595356	0.000893034
CELF2	0	3.16993	0	1.58496	2	7.15987	3.58496	4.9542	2.80735	1.58496	0	8	0	2	3	142	11	30	6	2	0	0.000446304	0	0.000111576	0.000167364	0.0079219	0.000613668	0.00167364	0.000334728	0.000111576
IGFL1	2.80735	2.58496	2.32193	2.80735	0	6.52356	3.90689	3.90689	4.90689	0	6	5	4	6	0	91	14	14	29	0	0.00372902	0.00310752	0.00248602	0.00372902	0	0.0565569	0.00870106	0.00870106	0.0180236	0
ST8SIA6	0	0	0	1.58496	1	0	4.39232	3.80735	4.45943	3	0	0	0	2	1	0	20	13	21	7	0	0	0	0.000539374	0.000269687	0	0.00539374	0.00350593	0.00566343	0.00188781
ZFP57	0	0	0	0	0	0	4.9542	3.45943	5.83289	2.32193	0	0	0	0	0	0	30	10	56	4	0	0	0	0	0	0	0.0230061	0.00766871	0.0429448	0.00306748
RP11-81A22.5	0	0	1	2	1.58496	2.58496	3.32193	3	4.75489	0	0	0	1	3	2	5	9	7	26	0	0	0	0.00083612	0.00250836	0.00167224	0.0041806	0.00752508	0.00585284	0.0217391	0
RP11-229A12.2	0	1	0	1.58496	0	1	3.90689	2	5.32193	0	0	1	0	2	0	1	14	3	39	0	0	0.00083612	0	0.00167224	0	0.00083612	0.0117057	0.00250836	0.0326087	0
RP11-297N6.4	0	1	0	0	0	3.70044	0	1.58496	3.90689	1	0	1	0	0	0	12	0	2	14	1	0	0.000399521	0	0	0	0.00479425	0	0.000799041	0.00559329	0.000399521
AKT3	0	0	0	0	0	3	0	1	4.16993	0	0	0	0	0	0	7	0	1	17	0	0	0	0	0	0	0.000483025	0	6.90036e-05	0.00117306	0
COX11P1	0	1	0	0	0	2	1	2	4.24793	0	0	1	0	0	0	3	1	3	18	0	0	0.00083612	0	0	0	0.00250836	0.00083612	0.00250836	0.0150502	0
HLA-DRA	0	2	0	0	0	4.16993	0	2.80735	5.49185	0	0	3	0	0	0	17	0	6	44	0	0	0.0011534	0	0	0	0.00653595	0	0.00230681	0.0169166	0
CTD-2514C3.1	0	0	1	1	1	3.32193	1	1.58496	2.80735	3	0	0	1	1	1	9	1	2	6	7	0	0	0.00083612	0.00083612	0.00083612	0.00752508	0.00083612	0.00167224	0.00501672	0.00585284
HMGB3P6	0	0	0	1	0	3.45943	1	1.58496	2.80735	1.58496	0	0	0	1	0	10	1	2	6	2	0	0	0	0.00083612	0	0.0083612	0.00083612	0.00167224	0.00501672	0.00167224
SYT5	1	1	0	1	0	2.80735	2	2.58496	2	2.32193	1	1	0	1	0	6	3	5	3	4	0.000131718	0.000131718	0	0.000131718	0	0.000790306	0.000395153	0.000658588	0.000395153	0.00052687
RP11-513M16.8	0	1	0	1	2	4.16993	2.32193	2.58496	3.16993	3	0	1	0	1	3	17	4	5	8	7	0	0.00083612	0	0.00083612	0.00250836	0.014214	0.00334448	0.0041806	0.00668896	0.00585284
UBE2Q2P10	0	1	0	1	1	3.90689	2	2	1	4.08746	0	1	0	1	1	14	3	3	1	16	0	0.00083612	0	0.00083612	0.00083612	0.0117057	0.00250836	0.00250836	0.00083612	0.0133779
C21orf67	2	0	0	0	1.58496	4.85798	2	3.32193	0	3.16993	3	0	0	0	2	28	3	9	0	8	0.000591133	0	0	0	0.000394089	0.00551724	0.000591133	0.0017734	0	0.00157635
HSPA8P9	1.58496	1	1	0	1.58496	5.83289	0	1	1	3.70044	2	1	1	0	2	56	0	1	1	12	0.00167224	0.00083612	0.00083612	0	0.00167224	0.0468227	0	0.00083612	0.00083612	0.0100334
C6orf100	2.58496	1	0	1.58496	1	4.08746	4.52356	1.58496	3	1.58496	5	1	0	2	1	16	22	2	7	2	0.00345781	0.000691563	0	0.00138313	0.000691563	0.011065	0.0152144	0.00138313	0.00484094	0.00138313
CDH5	0	0	0	0	0	5.49185	3.90689	0	3.16993	2.32193	0	0	0	0	0	44	14	0	8	4	0	0	0	0	0	0.0030069	0.000956742	0	0.000546709	0.000273355
S100A9	0	0	0	0	0	5	2.32193	1	1	0	0	0	0	0	0	31	4	1	1	0	0	0	0	0	0	0.0223827	0.00288809	0.000722022	0.000722022	0
RP11-107N15.1	0	0	0	0	0	3.80735	2.32193	0	2	0	0	0	0	0	0	13	4	0	3	0	0	0	0	0	0	0.0108696	0.00334448	0	0.00250836	0
GATA2	0	0	0	0	0	2.58496	2	1.58496	1	0	0	0	0	0	0	5	3	2	1	0	0	0	0	0	0	0.000965251	0.000579151	0.0003861	0.00019305	0
CALCB	0	0	0	0	0	4.32193	1	0	2.80735	1	0	0	0	0	0	19	1	0	6	1	0	0	0	0	0	0.00342527	0.000180278	0	0.00108167	0.000180278
SLC25A1P3	0	0	0	0	1.58496	1	2.32193	2.58496	1	2.58496	0	0	0	0	2	1	4	5	1	5	0	0	0	0	0.00167224	0.00083612	0.00334448	0.0041806	0.00083612	0.0041806
LRRC48	1	0	0	0	0	1	2	1.58496	3.16993	2	1	0	0	0	0	1	3	2	8	3	5.47256e-05	0	0	0	0	5.47256e-05	0.000164177	0.000109451	0.000437804	0.000164177
AC022154.7	0	0	0	0	0	0	3.16993	0	2	4.52356	0	0	0	0	0	0	8	0	3	22	0	0	0	0	0	0	0.00222965	0	0.00083612	0.00613155
LINC01063	0	0	0	0	0	3.70044	2.32193	0	1	3.45943	0	0	0	0	0	12	4	0	1	10	0	0	0	0	0	0.0100334	0.00334448	0	0.00083612	0.0083612
SCGB1B2P	0	0	0	0	0	2	2.32193	1	0	3.32193	0	0	0	0	0	3	4	1	0	9	0	0	0	0	0	0.00250836	0.00334448	0.00083612	0	0.00752508
RP11-96D1.10	2.80735	3.70044	4.16993	3.32193	2	5.58496	4.32193	4.75489	3.70044	4.85798	6	12	17	9	3	47	19	26	12	28	0.00501672	0.0100334	0.014214	0.00752508	0.00250836	0.0392977	0.0158863	0.0217391	0.0100334	0.0234114
AC139099.3	4	2.32193	3.45943	2.80735	0	5.61471	4.85798	5.16993	2	4.80735	15	4	10	6	0	48	28	35	3	27	0.0062709	0.00167224	0.0041806	0.00250836	0	0.0200669	0.0117057	0.0146321	0.00125418	0.0112876
TCF15	2.58496	1	3.32193	2	2.58496	4.90689	4.39232	4.58496	2	6.14975	5	1	9	3	5	29	20	23	3	70	0.00251256	0.000502513	0.00452261	0.00150754	0.00251256	0.0145729	0.0100503	0.0115578	0.00150754	0.0351759
MLF1	3.45943	1	2	3.32193	2	5.83289	3.32193	5.45943	5.67243	5.55459	10	1	3	9	3	56	9	43	50	46	0.00102902	0.000102902	0.000308705	0.000926116	0.000308705	0.0057625	0.000926116	0.00442478	0.00514509	0.00473348
RP11-46C24.7	2.32193	2.32193	2.58496	2	2	3.80735	3.16993	4.45943	4.9542	4.80735	4	4	5	3	3	13	8	21	30	27	0.00334448	0.00334448	0.0041806	0.00250836	0.00250836	0.0108696	0.00668896	0.0175585	0.0250836	0.0225753
CORO1A	2.58496	0	0	3.90689	2.58496	8.31288	4.85798	4.9542	5.24793	5.52356	5	0	0	14	5	317	28	30	37	45	0.000504592	0	0	0.00141286	0.000504592	0.0319911	0.00282571	0.00302755	0.00373398	0.00454133
TMEM173	4.08746	0	0	1.58496	2	6.45943	5.45943	5.16993	5.12928	4.16993	16	0	0	2	3	87	43	35	34	17	0.0017494	0	0	0.000218675	0.000328012	0.00951236	0.00470151	0.00382681	0.00371747	0.00185874
FLI1	0	1.58496	0	4.16993	3.45943	4.80735	5.85798	4.32193	4.32193	4.9542	0	2	0	17	10	27	57	19	19	30	0	0.000154202	0	0.00131072	0.00077101	0.00208173	0.00439476	0.00146492	0.00146492	0.00231303
SERPINB2	2.32193	1	0	2.58496	4	5.72792	3.32193	1	0	7.39232	4	1	0	5	15	52	9	1	0	167	0.000737191	0.000184298	0	0.000921489	0.00276447	0.00958349	0.00165868	0.000184298	0	0.0307777
RP11-420G6.4	0	1	2	0	3	5.45943	0	3.70044	2.80735	5.55459	0	1	3	0	7	43	0	12	6	46	0	0.00041806	0.00125418	0	0.00292642	0.0179766	0	0.00501672	0.00250836	0.0192308
CDKL1	1.58496	2.32193	1	2.32193	1	3.80735	3.32193	2	3.58496	4.08746	2	4	1	4	1	13	9	3	11	16	0.000204019	0.000408038	0.00010201	0.000408038	0.00010201	0.00132612	0.000918086	0.000306029	0.00112211	0.00163215
MT1G	0	3	0	2.32193	1.58496	3.45943	2.58496	2.32193	4.58496	4.16993	0	7	0	4	2	10	5	4	23	17	0	0.00420673	0	0.00240385	0.00120192	0.00600962	0.00300481	0.00240385	0.0138221	0.0102163
RP5-1157M23.2	1	2.80735	0	2	1	3	2.80735	4	2	4.32193	1	6	0	3	1	7	6	15	3	19	0.00083612	0.00501672	0	0.00250836	0.00083612	0.00585284	0.00501672	0.0125418	0.00250836	0.0158863
SOX8	1.58496	3.45943	0	1	1.58496	2	2.80735	5	5.35755	3.80735	2	10	0	1	2	3	6	31	40	13	0.000717103	0.00358551	0	0.000358551	0.000717103	0.00107565	0.00215131	0.0111151	0.0143421	0.00466117
GABRB3	2	3.45943	1	0	3.90689	3.32193	5.32193	1	4.9542	6.06609	3	10	1	0	14	9	39	1	30	66	0.000167645	0.000558815	5.58815e-05	0	0.000782341	0.000502934	0.00217938	5.58815e-05	0.00167645	0.00368818
DHRS2	1	1.58496	2	0	3.70044	0	4.24793	3.58496	5.12928	6.40939	1	2	3	0	12	0	18	11	34	84	0.0002331	0.0004662	0.000699301	0	0.0027972	0	0.0041958	0.0025641	0.00792541	0.0195804
FOSB	2.80735	3.80735	0	1	1.58496	5.67243	6.89482	8.98584	0	0	6	13	0	1	2	50	118	506	0	0	0.000861698	0.00186701	0	0.000143616	0.000287233	0.00718081	0.0169467	0.0726698	0	0
CTD-2354A18.1	1.58496	2.80735	0	1	0	0	2.58496	9.43879	3	0	2	6	0	1	0	0	5	693	7	0	0.000557414	0.00167224	0	0.000278707	0	0	0.00139353	0.193144	0.00195095	0
HLA-DQB1	5.12928	1	0	0	5.88264	0	0	8.8392	7.97728	6.33985	34	1	0	0	58	0	0	457	251	80	0.00814371	0.000239521	0	0	0.0138922	0	0	0.109461	0.0601198	0.0191617
XXbac-BPG254F23.6	5.12928	1	0	0	5.88264	0	0	8.82018	7.96	6.2854	34	1	0	0	58	0	0	451	248	77	0.0284281	0.00083612	0	0	0.048495	0	0	0.37709	0.207358	0.0643813
RPS2P7	7.34873	7.69349	7.8009	7.71425	9.50978	10.5953	8.03342	8.13443	8.49985	10.0674	162	206	222	209	728	1546	261	280	361	1072	0.0677258	0.0861204	0.0928094	0.0873746	0.304348	0.646321	0.109114	0.117057	0.15092	0.448161
CTB-33G10.1	7.04439	7.49985	8.17991	6.75489	9.14975	11.4346	7.56986	8.19967	8.36194	9.66356	131	180	289	107	567	2767	189	293	328	810	0.109532	0.150502	0.241639	0.0894649	0.47408	2.31355	0.158027	0.244983	0.274247	0.677258
SH3BP5L	7.47573	7.42626	7.19967	6.98868	9.52552	10.1046	7.30378	9.04439	7.7879	10.0808	177	171	146	126	736	1100	157	527	220	1082	0.0460578	0.0444965	0.0379912	0.0327869	0.191517	0.286235	0.0408535	0.137132	0.0572469	0.281551
PRMT1	7.60733	7.35755	7.83289	6.75489	8.60363	10.0126	7.33092	7.98868	8.33092	9.16491	194	163	227	107	388	1032	160	253	321	573	0.0152133	0.0127823	0.0178011	0.00839084	0.0304266	0.0809285	0.0125471	0.01984	0.0251725	0.0449341
ANXA2P3	7.15987	6.83289	7.98299	8.04439	8.8392	10.2889	6.76818	7.62205	7.73471	10.5507	142	113	252	263	457	1250	108	196	212	1499	0.118729	0.0944816	0.210702	0.2199	0.382107	1.04515	0.090301	0.16388	0.177258	1.25334
KRT8P36	8.26679	6.37504	7.67948	7.41785	9.29462	10.5594	8.56986	8.18982	8.11894	11.0715	307	82	204	170	627	1508	379	291	277	2151	0.256689	0.0685619	0.170569	0.14214	0.524247	1.26087	0.31689	0.243311	0.231605	1.79849
AC174470.1	7.37504	6.71425	7.73471	7.45121	6.83289	10.1824	7.69349	7.84549	9.09011	9.18735	165	104	212	174	113	1161	206	229	544	582	0.0240735	0.0151736	0.0309308	0.0253866	0.0164867	0.16939	0.0300554	0.0334111	0.0793697	0.0849139
FAM195B	7.37504	6.6865	7.65821	7.39232	6.83289	10.1787	7.57743	7.8392	9.07146	9.17243	165	102	201	167	113	1158	190	228	537	576	0.053243	0.0329138	0.0648596	0.0538884	0.0364634	0.373669	0.0613101	0.0735721	0.173282	0.185866
CDKN2A	7.29462	6.87036	8.43045	8.05528	8.11374	10.388	7.54689	7.27612	9.28309	9.33539	156	116	344	265	276	1339	186	154	622	645	0.0134727	0.0100181	0.029709	0.0228863	0.0238363	0.11564	0.0160636	0.0132999	0.0537179	0.0557043
HYAL2	8.33985	8.11894	8.8857	7.90689	8.11374	10.9701	7.9542	8.64746	8.93958	9.3015	323	277	472	239	276	2005	247	400	490	630	0.0778876	0.0667953	0.113817	0.057632	0.0665541	0.483482	0.0595611	0.0964553	0.118158	0.151917
KRT16	8.18488	8.17493	7.7879	8.633	8.29921	10.2444	7.15987	9.21432	8.97441	9.46964	290	288	220	396	314	1212	142	593	502	708	0.0586926	0.0582878	0.0445254	0.0801457	0.0635499	0.245294	0.0287391	0.120016	0.101599	0.143291
SNHG5	8.22882	8.67948	8.53138	6.50779	7.16993	10.3399	9.47168	7.83289	8.10329	9.66356	299	409	369	90	143	1295	709	227	274	810	0.0717026	0.0980815	0.0884892	0.0215827	0.0342926	0.310552	0.170024	0.0544365	0.0657074	0.194245
TSSC4	6.78136	6.45943	7.54689	6.79442	7.84549	9.36194	6.47573	6.94251	8.5157	8.93074	109	87	186	110	229	657	88	122	365	487	0.0268539	0.0214339	0.0458241	0.0271003	0.0564178	0.161863	0.0216802	0.0300567	0.0899236	0.11998
OAZ2	6.93074	6.33985	6.55459	6.71425	7.79442	9.36194	7	7.03342	7.15987	8.6865	121	80	93	104	221	657	127	130	142	411	0.02	0.0132231	0.0153719	0.0171901	0.0365289	0.108595	0.0209917	0.0214876	0.0234711	0.0679339
KRT8P11	7.60733	6	7.33985	7.31288	8.14466	8.97154	7.90689	7.3837	7.46761	9.85487	194	63	161	158	282	501	239	166	176	925	0.162207	0.0526756	0.134615	0.132107	0.235786	0.418896	0.199833	0.138796	0.147157	0.773411
PKMP1	5.75489	6.40939	6.2854	6.08746	8.26679	9.65642	5.88264	6.62936	6.84549	9.04166	53	84	77	67	307	806	58	98	114	526	0.0443144	0.0702341	0.0643813	0.0560201	0.256689	0.673913	0.048495	0.0819398	0.0953177	0.439799
CCDC124	6.32193	6.16993	6.61471	5.93074	7.40939	9.09803	6	7.06609	7.13955	8.38802	79	71	97	60	169	547	63	133	140	334	0.0204451	0.0183747	0.0251035	0.015528	0.0437371	0.141563	0.0163043	0.0344203	0.0362319	0.0864389
CTD-3214H19.16	7.65105	7.71425	8.36194	7.52356	7.45943	9.2384	8.34873	8.14466	9.5812	8.74819	200	209	328	183	175	603	325	282	765	429	0.128123	0.133889	0.210122	0.117233	0.112108	0.386291	0.2082	0.180653	0.49007	0.274824
TRAPPC5	7.65105	7.71425	8.36194	7.52356	7.45943	9.2384	8.34873	8.14466	9.5812	8.74819	200	209	328	183	175	603	325	282	765	429	0.162075	0.169368	0.265802	0.148298	0.141815	0.488655	0.263371	0.228525	0.619935	0.34765
DPCD	7.96578	7.92481	7.83289	7.89482	7.55459	8.8392	8.31288	8.31741	10.7928	7.96	249	242	227	237	187	457	317	318	1773	248	0.0459749	0.0446824	0.0419129	0.0437592	0.0345273	0.0843796	0.0585303	0.0587149	0.327363	0.0457903
C8orf59	7.01123	7.47573	7.10852	7.82018	8.07682	8.72451	7.9542	7.40939	10.0417	8.25267	128	177	137	225	269	422	247	169	1053	304	0.0193237	0.026721	0.0206824	0.0339674	0.0406099	0.0637077	0.0372886	0.0255133	0.158967	0.0458937
APLP1	8.08746	7.04439	8.56986	6.79442	7.7879	9.15987	8.35755	9.41574	9.31288	7.80735	271	131	379	110	220	571	327	682	635	223	0.0186408	0.00901087	0.0260696	0.00756638	0.0151328	0.0392764	0.0224928	0.0469115	0.0436786	0.0153391
MT2A	6.47573	6.52356	7.62205	7.01123	5.70044	9.94251	8.7211	9.06609	9.98014	8.22882	88	91	196	128	51	983	421	535	1009	299	0.0583554	0.0603448	0.129973	0.0848806	0.0338196	0.651857	0.279178	0.354775	0.669098	0.198276
SERTAD1	7.34873	6.91886	6.91886	6.75489	7.09803	8.12928	8.00562	7.97728	8.2384	8.37069	162	120	120	107	136	279	256	251	301	330	0.0663934	0.0491803	0.0491803	0.0438525	0.0557377	0.114344	0.104918	0.102869	0.123361	0.135246
MGMT	6.33985	6.87036	6.26679	7.07682	7.17991	8.6865	7.29462	7.53138	8.58871	7.55459	80	116	76	134	144	411	156	184	384	187	0.0138074	0.0200207	0.013117	0.0231274	0.0248533	0.0709355	0.0269244	0.031757	0.0662755	0.0322748
GALK1	5.52356	7.33985	7.15987	6.6865	7.53138	8.29462	8.09803	8.16491	8.13955	8.14466	45	161	142	102	184	313	273	286	281	282	0.00648602	0.0232055	0.020467	0.0147016	0.0265206	0.0451139	0.0393485	0.0412223	0.0405016	0.0406457
ZG16B	6.37504	7.45121	7.49185	6.37504	6.26679	9.00843	8.03342	7.26679	8.7879	6.61471	82	174	179	82	76	514	261	153	441	97	0.0169667	0.0360025	0.037037	0.0169667	0.0157252	0.106352	0.0540037	0.0316574	0.0912477	0.0200703
STMN2	7.01123	5.58496	3.80735	6.82018	5.08746	9.25974	8.54303	10.0403	9.98014	9.76155	128	47	13	112	33	612	372	1052	1009	867	0.0500978	0.0183953	0.00508806	0.0438356	0.0129159	0.23953	0.145597	0.411742	0.394912	0.339335
APOL1	8.75154	8.31741	8.92778	9.01123	9.85175	9.78627	10.4242	10.8842	10.3696	9.86882	430	318	486	515	923	882	1373	1889	1322	934	0.0550858	0.0407379	0.0622598	0.0659749	0.118242	0.11299	0.17589	0.241993	0.169357	0.119652
JUN	8.22882	8.99435	8.98584	9.07682	8.89482	9.7364	9.44915	11.3971	8.69697	9.02514	299	509	506	539	475	852	698	2696	414	520	0.131083	0.223148	0.221833	0.2363	0.208242	0.37352	0.306006	1.18194	0.181499	0.22797
IFITM2	9.21432	7.53138	10.2408	7.8009	8.35315	10.8796	9.87652	10.5507	10.3498	8.56605	593	184	1209	222	326	1883	939	1499	1304	378	0.147512	0.0457711	0.300746	0.0552239	0.0810945	0.468408	0.233582	0.372886	0.324378	0.0940299
TSPAN13	8.45533	9.03342	8.35755	8.83289	9.28771	9.29002	9.95565	8.53916	11.8887	9.02514	350	523	327	455	624	625	992	371	3791	520	0.101833	0.152168	0.0951411	0.132383	0.181554	0.181845	0.288624	0.107943	1.103	0.151295
RNASET2	8.82018	8.17493	8.39232	7.8009	8.53138	9.82337	10.3509	9.62022	9.75822	7.36632	451	288	335	222	369	905	1305	786	865	164	0.045551	0.029088	0.033835	0.022422	0.037269	0.0914049	0.131805	0.0793859	0.0873649	0.016564
EGR1	8.54303	8.27612	7.87036	8.55459	8.01681	7.94251	10.1059	10.9121	8.84235	7.45943	372	309	233	375	258	245	1101	1926	458	175	0.153086	0.12716	0.0958848	0.154321	0.106173	0.100823	0.453086	0.792593	0.188477	0.0720165
CNOT1	8.78463	9.04166	9.24793	13.5894	9.53722	8.04439	9.0954	9.31967	8.43045	9.25974	440	526	607	12325	742	263	546	638	344	612	0.0154067	0.018418	0.0212542	0.431563	0.0259813	0.00920901	0.0191183	0.0223397	0.0120452	0.0214293
NACA3P	9.72792	9.20701	8.20457	12.4419	8.80735	7.9542	9.64746	9.09011	9.3966	8.42206	847	590	294	5563	447	247	801	544	673	342	0.708194	0.493311	0.245819	4.65134	0.373746	0.206522	0.669732	0.454849	0.562709	0.285953
HNRNPA0	9.13699	9.08746	9.37504	8.87652	9.70044	9.80574	8.96	9.26444	8.98299	13.9131	562	543	663	469	831	894	497	614	505	15425	0.203476	0.196597	0.240043	0.169804	0.300869	0.323678	0.179942	0.222303	0.182839	5.58472
SDF2L1	8.31741	7.85175	8.40939	8.87958	9.58496	10.4969	8.14975	8.69349	9.02237	11.6475	318	230	339	470	767	1444	283	413	519	3207	0.126441	0.0914513	0.134791	0.186879	0.30497	0.574155	0.112525	0.164215	0.206362	1.27515
KRT8P8	9.68299	7.81378	9.34873	9.15482	10.4083	11.3089	9.66	9.32643	9.52943	12.0647	821	224	651	569	1358	2536	808	641	738	4283	0.686455	0.187291	0.544314	0.475753	1.13545	2.1204	0.675585	0.535953	0.617057	3.5811
RP11-12M9.3	7.7879	8.09276	9.26209	8.00562	10.0444	12.1765	8.10852	8.82655	9.30834	10.9248	220	272	613	256	1055	4628	275	453	633	1943	0.183486	0.226856	0.511259	0.213511	0.8799	3.85988	0.229358	0.377815	0.52794	1.62052
U2AF2	7.77479	8.03342	8.54689	7.8392	10.2082	11.2917	7.83289	8.85487	8.54303	11.1344	218	261	373	228	1182	2506	227	462	372	2247	0.0137418	0.0164523	0.0235124	0.0143722	0.0745083	0.157968	0.0143091	0.0291225	0.0234493	0.141641
SLC7A7	9.16491	8.70736	9.33985	9.22641	8.92778	5.70044	7.79442	8.52748	6.33985	8.64746	573	417	647	598	486	51	221	368	80	400	0.0717595	0.0522229	0.0810269	0.0748904	0.0608641	0.00638698	0.0276769	0.0460864	0.0100188	0.0500939
B3GALT5	9.72281	8.60363	8.83605	8.65105	9.11634	5.55459	8.33539	7.53916	6.78136	8.81057	844	388	456	401	554	46	322	185	109	448	0.0601268	0.0276412	0.0324856	0.0285674	0.0394671	0.00327705	0.0229394	0.0131795	0.00776519	0.0319157
LOXL4	9.80896	8.62571	9.45943	9.94105	7.67243	7.67948	8.5812	8.30834	8.33539	8.29462	896	394	703	982	203	204	382	316	322	313	0.36918	0.16234	0.289658	0.404615	0.0836424	0.0840544	0.157396	0.130202	0.132674	0.128966
FKBP11	9.31515	9.43671	9.12928	8.48784	8.23362	7.92481	7.39232	7.7211	7.96	7.53138	636	692	559	358	300	242	167	210	248	184	0.0769045	0.0836759	0.0675937	0.043289	0.0362757	0.0292624	0.0201935	0.025393	0.0299879	0.0222491
ANO1	8.85487	9.21432	9.1472	8.82337	8.63662	7.63662	7.34873	7.82018	7.55459	7.88874	462	593	566	452	397	198	162	225	187	236	0.0462926	0.0594188	0.0567134	0.0452906	0.0397796	0.0198397	0.0162325	0.0225451	0.0187375	0.0236473
S100A4	9.21432	9.23601	9.17742	7.62205	8.70736	8.36632	6.79442	7.12928	7.40939	8.13955	593	602	578	196	417	329	110	139	169	281	0.441878	0.448584	0.4307	0.146051	0.31073	0.245156	0.0819672	0.103577	0.125931	0.209389
CAPN8	8.52356	9.73132	8.94544	8.88264	8.92481	6.44294	8.73132	7.7211	7.59991	6.89482	367	849	492	471	485	86	424	210	193	118	0.0201992	0.0467279	0.0270791	0.0259233	0.0266938	0.00473334	0.0233365	0.0115581	0.0106225	0.00649458
IMPA2	7.75489	8.54689	8.98868	8.29462	8.77808	6.10852	7.79442	7.20945	7.5157	7.44294	215	373	507	313	438	68	221	147	182	173	0.0164751	0.0285824	0.0388506	0.0239847	0.0335632	0.00521073	0.0169349	0.0112644	0.0139464	0.0132567
CA12	7.67243	9.33762	8.92481	7.75489	7.69349	7.37504	7.27612	7.70044	7.98299	6.37504	203	646	485	215	206	165	154	207	252	82	0.0238964	0.0760447	0.0570924	0.025309	0.0242496	0.0194232	0.0181283	0.0243673	0.0296645	0.00965274
GATA6-AS1	8.12412	8.92481	8.69697	7.69349	9.224	6.44294	7.97728	6.90689	7.02237	6.37504	278	485	414	206	597	86	251	119	129	82	0.07577	0.132189	0.112837	0.0561461	0.162715	0.0234396	0.068411	0.0324339	0.0351594	0.0223494
ACSS1	7.98868	8.75489	8.24793	7.82018	8.5157	6.04439	7.78136	6.16993	6.83289	6.02237	253	431	303	225	365	65	219	71	113	64	0.0524244	0.0893079	0.0627849	0.0466225	0.075632	0.0134687	0.0453792	0.014712	0.0234148	0.0132615
SLC43A1	6.44294	8.45533	8.51964	9.03342	8.92481	6.40939	7.61471	8.25739	6.93074	6.74147	86	350	366	523	485	84	195	305	121	106	0.0066476	0.0270542	0.0282909	0.0404267	0.0374894	0.006493	0.015073	0.0235758	0.00935302	0.00819355
SYT8	8.16993	9.43045	9.98014	7.20945	8.82972	7.33092	6.40939	5.08746	9.15482	7.08746	287	689	1009	147	454	160	84	33	569	135	0.0423179	0.101592	0.148776	0.021675	0.0669419	0.0235919	0.0123857	0.00486582	0.0838986	0.0199056
MYEOV	9.54689	7.79442	9.43879	8.93664	7.93664	7.03342	7.30378	3.80735	6.78136	8.68299	747	221	693	489	244	130	157	13	109	410	0.0789641	0.0233615	0.0732558	0.0516913	0.0257928	0.0137421	0.0165962	0.00137421	0.0115222	0.0433404
GSTM4	9.92333	11.1818	10.6221	10.3072	9.55075	8.18488	9.67772	9.01681	7.37504	7.67948	970	2322	1575	1266	749	290	818	517	165	204	0.125113	0.299497	0.203147	0.163292	0.0966078	0.0374049	0.105508	0.0666839	0.0212821	0.0263124
AKR1B10	7.85175	9.53528	9.76818	10.4019	11.1053	7	8.22882	7.61471	7.26679	9.3015	230	741	871	1352	2202	127	299	195	153	630	0.0848395	0.273331	0.321284	0.498709	0.812246	0.0468462	0.110291	0.0719292	0.0564367	0.232387
PCK1	7.75489	11.5221	10.2252	7.65105	11.0855	7.29462	10.2479	7.70044	7.12928	6.30378	215	2940	1196	200	2172	156	1215	207	139	78	0.0277205	0.379061	0.154203	0.0257865	0.280041	0.0201135	0.156653	0.026689	0.0179216	0.0100567
ALDH3A1	7.09803	12.0196	10.66	7.47573	12.8644	7.97728	7.2854	7.10852	8.25267	9.68124	136	4151	1617	177	7456	251	155	137	304	820	0.0120986	0.369273	0.143848	0.0157459	0.663286	0.022329	0.0137888	0.0121875	0.0270439	0.0729472
CEACAM5	10.2866	10.4757	11.2715	8.59991	11.1911	4.80735	7.63662	8.96	6.82018	9.28771	1248	1423	2471	387	2337	27	198	497	112	624	0.163565	0.186501	0.323853	0.0507208	0.306291	0.00353866	0.0259502	0.0651376	0.0146789	0.0817824
UGT1A1	10.8978	10.599	8.30834	9.60733	9.67243	4.32193	8.15987	6.16993	6.52356	8.9571	1907	1550	316	779	815	19	285	71	91	496	0.985021	0.80062	0.163223	0.402376	0.420971	0.00981405	0.147211	0.0366736	0.0470041	0.256198
DPCR1	8.47168	10.8903	7.12928	7.97154	11.0189	6.78136	4.52356	7	4.24793	8.93074	354	1897	139	250	2074	109	22	127	18	487	0.153913	0.824783	0.0604348	0.108696	0.901739	0.0473913	0.00956522	0.0552174	0.00782609	0.211739
TSKU	7.2854	7.60733	7.52356	7.22882	8.16491	6.37504	6.35755	7.14975	5.9542	6.75489	155	194	183	149	286	82	81	141	61	107	0.0387113	0.0484515	0.0457043	0.0372128	0.0714286	0.0204795	0.0202298	0.0352148	0.0152348	0.0267233
AUTS2	6.93074	7.97154	7.59246	7.56224	8.13955	5.90689	6.26679	7	6.47573	6.45943	121	250	192	188	281	59	76	127	88	87	0.00636809	0.0131572	0.0101047	0.00989422	0.0147887	0.0031051	0.00399979	0.00668386	0.00463134	0.00457871
AC073610.5	7.69349	7.73471	7.6865	6.9542	6.79442	6.40939	5.80735	6.47573	6.62936	6.02237	206	212	205	123	110	84	55	88	98	64	0.147989	0.152299	0.14727	0.0883621	0.079023	0.0603448	0.0395115	0.0632184	0.0704023	0.045977
ETV4	6.32193	6.87036	8.63662	7.02237	7.37504	6.88264	6.82018	6.18982	5.80735	6.04439	79	116	397	129	165	117	112	72	55	65	0.0118708	0.0174305	0.0596544	0.0193839	0.0247934	0.0175808	0.0168295	0.0108189	0.00826446	0.00976709
FAM198B	7.33092	5.78136	6.47573	6.44294	7.93664	6.12928	6.32193	5.45943	6.04439	5.67243	160	54	88	86	244	69	79	43	65	50	0.0161698	0.0054573	0.00889338	0.00869126	0.0246589	0.00697322	0.00798383	0.00434563	0.00656897	0.00505306
TM4SF5	8.52748	7.85175	8.5157	8.84235	8.56605	6.16993	7.01123	7.39232	5.39232	7.43463	368	230	365	458	378	71	128	167	41	172	0.287725	0.179828	0.285379	0.358092	0.295543	0.0555121	0.100078	0.130571	0.0320563	0.13448
SLCO2B1	8.65105	7.85798	8.78136	7.65821	8.09803	5.75489	7.37504	5.75489	3.90689	7.94837	401	231	439	201	273	53	165	53	14	246	0.0297831	0.0171569	0.0326055	0.0149287	0.0202763	0.00393642	0.0122549	0.00393642	0.00103981	0.0182709
AMN	7.09803	8.08746	7.49185	7.84549	8.09803	4.9542	7.06609	7.11894	5.20945	5.85798	136	271	179	229	273	30	133	138	36	57	0.032466	0.0646932	0.042731	0.054667	0.0651707	0.00716161	0.0317498	0.0329434	0.00859394	0.0136071
KLF2	7.2854	7.57743	6.89482	7.04439	8.61839	5.24793	6.40939	7.62205	3.58496	7.17991	155	190	118	131	392	37	84	196	11	144	0.0754993	0.0925475	0.0574769	0.0638091	0.19094	0.0180224	0.0409157	0.09547	0.00535801	0.0701413
WSCD1	6.82018	7.30378	7.71425	8.47168	7.27612	5.58496	6.52356	5.97728	6.62936	6.94251	112	157	209	354	154	47	91	62	98	122	0.0074597	0.0104569	0.0139203	0.023578	0.0102571	0.00313041	0.00606101	0.00412948	0.00652724	0.00812575
SIRPA	7.87652	6.39232	7	9.03892	6.40939	5.42626	6.65821	5.42626	6.62936	6.32193	234	83	127	525	84	42	100	42	98	79	0.066383	0.0235461	0.0360284	0.148936	0.0238298	0.0119149	0.0283688	0.0119149	0.0278014	0.0224113
MYLK	8.68299	6.94251	7.08746	8.44294	5.97728	6.85798	6.06609	7.08746	6.06609	6.37504	410	122	135	347	62	115	66	135	66	82	0.00881228	0.00262219	0.0029016	0.0074582	0.00133259	0.00247174	0.00141856	0.0029016	0.00141856	0.00176246
C2orf72	8.81378	7.83289	8.67243	7.89482	6.75489	5.32193	7.71425	7.06609	6.70044	6.58496	449	227	407	237	107	39	209	133	103	95	0.115306	0.0582948	0.10452	0.0608629	0.0274782	0.0100154	0.0536723	0.0341551	0.026451	0.0243965
RP5-1024G6.8	9.39446	6.59991	6.04439	8.0607	7.07682	4.64386	6.55459	6.18982	6.72792	7.15987	672	96	65	266	134	24	93	72	105	142	0.561873	0.0802676	0.0543478	0.222408	0.11204	0.0200669	0.0777592	0.0602007	0.0877926	0.118729
NDRG4	10.9016	5.24793	7.67948	8.62936	5.24793	5.67243	8.05528	6.74147	6.47573	6.6865	1912	37	204	395	37	50	265	106	88	102	0.0874177	0.00169166	0.00932699	0.0180596	0.00169166	0.00228603	0.0121159	0.00484638	0.00402341	0.0046635
PSCA	9.43879	11.9833	6.80735	7.27612	6.79442	4.39232	6.56986	10.2408	6.18982	6.61471	693	4048	111	154	110	20	94	1209	72	97	0.201805	1.1788	0.0323238	0.0448457	0.0320326	0.00582411	0.0273733	0.352068	0.0209668	0.0282469
LGALS1	7.20945	9.47371	8.2854	8.71425	7.29462	7.07682	8.82655	7.44294	5.72792	2.80735	147	710	311	419	156	134	453	173	52	6	0.024619	0.118908	0.0520851	0.0701725	0.0261263	0.0224418	0.0758667	0.0289734	0.00870876	0.00100486
ADAM15	9.52943	9.62022	10.1472	9.16491	11.5127	12.8709	10.1306	11.4414	10.3674	11.5637	738	786	1133	573	2921	7490	1120	2780	1320	3026	0.0616799	0.0656916	0.0946929	0.0478897	0.244129	0.625992	0.0936064	0.232344	0.110322	0.252904
RPL15P3	9.46964	9.47978	9.85019	8.8857	9.80896	11.5236	10.0362	9.98157	11.0478	10.8178	708	713	922	472	896	2943	1049	1010	2116	1804	0.568218	0.572231	0.739968	0.378812	0.719101	2.36196	0.841894	0.810594	1.69823	1.44783
SLC2A3	10.4564	8.80413	9.72622	10.2204	8.27146	11.668	11.3123	10.9737	10.2808	11.0505	1404	446	846	1192	308	3253	2542	2010	1243	2120	0.117244	0.0372443	0.0706472	0.0995407	0.0257203	0.271649	0.212276	0.16785	0.1038	0.177035
RPL6	9.8392	9.6987	9.69349	9.85953	9.79116	10.1774	10.2923	12.3559	10.2276	10.3912	915	830	827	928	885	1157	1253	5241	1198	1342	0.145123	0.131642	0.131166	0.147185	0.140365	0.183505	0.198731	0.831245	0.190008	0.212847
SPINK1	9.51964	9.40088	8.20457	9.30606	11.1241	9.27845	11.4752	12.2709	11.2527	10.3432	733	675	294	632	2231	620	2846	4941	2439	1298	0.214516	0.197542	0.0860404	0.184958	0.652912	0.181446	0.832894	1.44601	0.713784	0.379865
RPL18AP3	10.1254	10.5469	11.3185	10.363	10.825	11.8669	10.8611	12.6221	11.7698	11.1855	1116	1495	2553	1316	1813	3734	1859	6303	3491	2328	0.892086	1.19504	2.04077	1.05196	1.44924	2.98481	1.48601	5.03837	2.79057	1.86091
RPL18A	9.94398	10.4888	11.1855	10.3597	10.7541	11.5641	10.8242	12.2929	11.8622	11.1762	984	1436	2328	1313	1726	3027	1812	5017	3722	2313	0.218764	0.319253	0.517563	0.291908	0.383726	0.672966	0.402846	1.11538	0.827479	0.514229
RPS5	10.6751	10.8439	11.6055	10.66	11.3977	13.2011	11.4909	11.4252	12.703	12.5127	1634	1837	3115	1617	2697	9416	2877	2749	6667	5843	0.446692	0.502187	0.851558	0.442045	0.737288	2.57408	0.786495	0.751504	1.82258	1.59732
KLK10	12.1418	10.9388	9.13443	8.96578	11.5579	13.3421	9.82337	12.6309	12.4359	11.0314	4518	1962	561	499	3014	10383	905	6342	5540	2092	0.762146	0.330972	0.0946356	0.0841768	0.508435	1.75152	0.152665	1.06984	0.934548	0.352901
TIMP2	12.1193	9.80252	11.0119	10.8098	9.21432	10.0362	10.1586	9.91139	9.5157	9.97871	4448	892	2064	1794	593	1049	1142	962	731	1008	0.679603	0.136287	0.315355	0.274102	0.0906035	0.160275	0.174484	0.146982	0.111688	0.154011
SPINK4	11.2161	11.1655	12.1453	10.4767	10.1059	8.5812	7.92481	9.84078	10.4221	10.341	2378	2296	4529	1424	1101	382	242	916	1371	1296	1.84056	1.77709	3.50542	1.10217	0.852167	0.295666	0.187307	0.708978	1.06115	1.0031
MUC5AC	10.9099	11.6613	12.8994	12.1824	12.8388	10.7952	8.22882	11.1261	9.99718	9.51175	1923	3238	7639	4647	7325	1776	299	2234	1021	729	0.803594	1.35311	3.19223	1.94191	3.06101	0.742165	0.124948	0.933556	0.426661	0.304639
AQP3	11.8467	13.9772	13.6297	11.1699	11.1599	11.0755	11.1935	10.0941	12.599	11.3151	3682	16126	12674	2303	2287	2157	2341	1092	6203	2547	1.09649	4.80226	3.77427	0.685825	0.68106	0.642347	0.697141	0.325194	1.84723	0.758487
TFF2	10.8819	12.8622	12.3326	11.279	12.8325	10.5127	10.8289	10.0914	11.4589	11.888	1886	7445	5157	2484	7293	1460	1818	1090	2814	3789	1.37464	5.42638	3.75875	1.8105	5.3156	1.06414	1.32507	0.794461	2.05102	2.76166
RP5-857K21.11	11.1917	12.0957	12.7766	11.4351	10.8971	10.0593	10.933	10.7465	11.0485	10.4378	2338	4376	7016	2768	1906	1066	1954	1717	2117	1386	1.95485	3.65886	5.86622	2.31438	1.59365	0.891304	1.63378	1.43562	1.77007	1.15886
MMP1	12.3143	14.0423	13.2818	13.2677	12.9553	9.40514	11.8711	11.4558	13.4765	12.5267	5092	16870	9958	9861	7941	677	3745	2808	11397	5900	3.01659	9.99408	5.89929	5.84182	4.70438	0.401066	2.2186	1.66351	6.75178	3.49526
REG4	12.8673	12.5575	14.6144	13.8133	13.5531	10.2167	10.5727	10.933	11.2883	13.5114	7471	6027	25082	14394	12019	1189	1522	1954	2500	11676	1.58721	1.28043	5.32866	3.058	2.55343	0.252603	0.323348	0.415126	0.531124	2.48056
CYSTM1	13.3129	13.335	13.9979	13.2925	13.2438	11.716	12.9989	12.5127	12.4969	11.973	10175	10332	16359	10032	9699	3363	8185	5843	5779	4019	1.9719	2.00233	3.17035	1.94419	1.87965	0.651744	1.58624	1.13236	1.11996	0.778876
TFF1	11.7936	13.9879	13.218	13.4748	14.9215	11.6847	13.0192	13.0044	12.1026	12.8876	3549	16246	9527	11384	31032	3291	8301	8216	4397	7577	2.54774	11.6626	6.8392	8.17229	22.2771	2.36253	5.95908	5.89806	3.1565	5.43934
RPS9	11.8057	11.6996	12.425	11.3044	12.5435	14.4331	11.9065	12.48	12.7973	13.0936	3579	3325	5498	2528	5969	22120	3838	5712	7117	8740	0.458729	0.426173	0.704691	0.324019	0.76506	2.83517	0.491925	0.73212	0.912202	1.12023
