# Supplementary material for: Application of human liver organoids as a patient-derived primary model for HBV infection and related hepatocellular carcinoma
Source: eLife. 2021 Jul 30;10:e60747. doi: 10.7554/eLife.60747 (PMC8384419; doi:10.7554/eLife.60747)
Supplement: Supplementary file 2. [file elife-60747-supp2.xlsx]

## Sheet: Sheet1
Table S2: Genecodis analysis
GO biological process
all signature genes
Genes	NGR	TNGR	NG	TNG	Hyp	Hyp*	Annotations
13 genes	136	34208	13	341	0.000122998	0.124843	GO:0006805: xenobiotic metabolic process (BP)
9 genes	56	34208	9	341	0.000438978	0.222782	GO:0007586: digestion (BP)
24 genes	630	34208	24	341	0.00280489	0.948987	GO:0055085: transmembrane transport (BP)
13 genes	181	34208	13	341	0.00393472	0.998436	GO:0019221: cytokine-mediated signaling pathway (BP)
20 genes	549	34208	20	341	0.0823537	0.000167178	GO:0006811: ion transport (BP)
30 genes	1176	34208	30	341	0.299356	0.000506411	GO:0007165: signal transduction (BP)
7 genes	75	34208	7	341	1.02096	0.00129535	GO:0060337: type I interferon-mediated signaling pathway (BP)
9 genes	136	34208	9	341	0.965131	0.00139944	GO:0032496: response to lipopolysaccharide (BP)
3 genes	6	34208	3	341	1.92057	0.00216598	GO:0046483: heterocycle metabolic process (BP)
7 genes	88	34208	7	341	2.92364	0.0029675	GO:0008202: steroid metabolic process (BP)
downregulated signature genes
Genes	NGR	TNGR	NG	TNG	Hyp	Hyp*	Annotations
12 genes	136	34208	12	225	1.20969e-05	0.00408876	GO:0006805: xenobiotic metabolic process (BP)
9 genes	56	34208	9	225	1.13694e-05	0.00768569	GO:0007586: digestion (BP)
21 genes	630	34208	21	225	0.000150458	0.0339031	GO:0055085: transmembrane transport (BP)
19 genes	549	34208	19	225	0.000513092	0.0867126	GO:0006811: ion transport (BP)
7 genes	88	34208	7	225	0.195953	0.000264928	GO:0008202: steroid metabolic process (BP)
3 genes	6	34208	3	225	0.553433	0.000623534	GO:0046483: heterocycle metabolic process (BP)
4 genes	20	34208	4	225	0.081281	0.000686824	GO:0017144: drug metabolic process (BP)
5 genes	41	34208	5	225	0.727521	0.000702578	GO:0006865: amino acid transport (BP)
2 genes	2	34208	2	225	4.30713	0.00323513	GO:0046485: ether lipid metabolic process (BP)
8 genes	200	34208	8	225	5.77955	0.00390697	GO:0034641: cellular nitrogen compound metabolic process (BP)
upregulated signature genes
Genes	NGR	TNGR	NG	TNG	Hyp	Hyp*	Annotations
7 genes	181	34208	7	116	0.296553	0.00154504	GO:0019221: cytokine-mediated signaling pathway (BP)
8 genes	341	34208	8	116	2.24209	0.00584066	GO:0008285: negative regulation of cell proliferation (BP)
14 genes	1176	34208	14	116	4.62423	0.00803075	GO:0007165: signal transduction (BP)
3 genes	23	34208	3	116	6.40348	0.00834053	GO:0002504: antigen processing and presentation of peptide or polysaccharide antigen via MHC class II (BP)
5 genes	136	34208	5	116	0.000103883	0.0108246	GO:0032496: response to lipopolysaccharide (BP)
4 genes	93	34208	4	116	0.000290437	0.0116398	GO:0006414: translational elongation (BP)
4 genes	82	34208	4	116	0.000179041	0.0116601	GO:0060333: interferon-gamma-mediated signaling pathway (BP)
4 genes	82	34208	4	116	0.000179041	0.0116601	GO:0019083: viral transcription (BP)
4 genes	92	34208	4	116	0.00027867	0.0120989	GO:0045471: response to ethanol (BP)
2 genes	7	34208	2	116	0.000236758	0.0123351	GO:0019886: antigen processing and presentation of exogenous peptide antigen via MHC class II (BP)
KEGG pathways
all signature genes
Genes	NGR	TNGR	NG	TNG	Hyp	Hyp*	Annotations
11 genes	68	34208	11	341	7.59716e-06	0.00110159	(KEGG) 00980: Metabolism of xenobiotics by cytochrome P450
9 genes	70	34208	9	341	0.00333407	0.024172	(KEGG) 00982: Drug metabolism - cytochrome P450
7 genes	61	34208	7	341	0.252841	0.000122207	(KEGG) 00830: Retinol metabolism
6 genes	52	34208	6	341	1.29913	0.000470933	(KEGG) 00140: Steroid hormone biosynthesis
4 genes	26	34208	4	341	0.000121954	0.00353667	(KEGG) 00053: Ascorbate and aldarate metabolism
6 genes	84	34208	6	341	0.000198581	0.00359928	(KEGG) 05323: Rheumatoid arthritis
5 genes	51	34208	5	341	0.000154152	0.00372535	(KEGG) 04978: Mineral absorption
4 genes	29	34208	4	341	0.000189235	0.00391987	(KEGG) 00591: Linoleic acid metabolism
7 genes	125	34208	7	341	0.000268362	0.00432362	(KEGG) 04514: Cell adhesion molecules (CAMs)
8 genes	172	34208	8	341	0.000351526	0.00509713	(KEGG) 05152: Tuberculosis
downregulated signature genes
Genes	NGR	TNGR	NG	TNG	Hyp	Hyp*	Annotations
9 genes	68	34208	9	225	6.90735e-05	0.00070455	(KEGG) 00980: Metabolism of xenobiotics by cytochrome P450
7 genes	70	34208	7	225	0.0409017	2.08599	(KEGG) 00982: Drug metabolism - cytochrome P450
4 genes	29	34208	4	225	3.80365	0.00129324	(KEGG) 00591: Linoleic acid metabolism
5 genes	61	34208	5	225	5.19025	0.00132351	(KEGG) 00830: Retinol metabolism
3 genes	23	34208	3	225	0.000451179	0.00767004	(KEGG) 00910: Nitrogen metabolism
4 genes	52	34208	4	225	0.000385167	0.0078574	(KEGG) 00140: Steroid hormone biosynthesis
4 genes	62	34208	4	225	0.000753986	0.0109867	(KEGG) 00010: Glycolysis / Gluconeogenesis
4 genes	70	34208	4	225	0.00118956	0.0151669	(KEGG) 03320: PPAR signaling pathway
3 genes	39	34208	3	225	0.00215481	0.0244212	(KEGG) 00620: Pyruvate metabolism
3 genes	53	34208	3	225	0.00516337	0.0438887	(KEGG) 00590: Arachidonic acid metabolism
upregulated signature genes
Genes	NGR	TNGR	NG	TNG	Hyp	Hyp*	Annotations
6 genes	172	34208	6	116	2.78101	0.00266977	(KEGG) 05152: Tuberculosis
4 genes	66	34208	4	116	7.69183	0.00369208	(KEGG) 05140: Leishmaniasis
4 genes	86	34208	4	116	0.000215123	0.00413036	(KEGG) 03010: Ribosome
3 genes	34	34208	3	116	0.000210562	0.00505349	(KEGG) 04940: Type I diabetes mellitus
3 genes	46	34208	3	116	0.000518561	0.00553132	(KEGG) 05150: Staphylococcus aureus infection
4 genes	102	34208	4	116	0.00041294	0.00566317	(KEGG) 05142: Chagas disease (American trypanosomiasis)
3 genes	45	34208	3	116	0.000485938	0.00583126	(KEGG) 00514: Other types of O-glycan biosynthesis
4 genes	113	34208	4	116	0.000608032	0.0058371	(KEGG) 04670: Leukocyte transendothelial migration
4 genes	84	34208	4	116	0.000196485	0.00628754	(KEGG) 05323: Rheumatoid arthritis
4 genes	101	34208	4	116	0.000397779	0.00636446	(KEGG) 04620: Toll-like receptor signaling pathway
NGR = Number of annotated genes in the reference list;
TNGR = Total number of genes in the reference list;
NG = Number of annotated genes in the input list;
TNG = Total number of genes in the input list;
Hyp = Hypergeometric pValue; Hyp* = Corrected hypergeometric pValue
Tabas-Madrid D, Nogales-Cadenas R, Pascual-Montano A: GeneCodis3: a non-redundant and modular enrichment analysis tool for functional genomics.
Nucleic Acids Research 2012; doi: 10.1093/nar/gks402
Nogales-Cadenas R, Carmona-Saez P, Vazquez M, Vicente C, Yang X, Tirado F, Carazo JM, Pascual-Montano A:
GeneCodis: interpreting gene lists through enrichment analysis and integration of diverse biological information. Nucleic Acids Research 2009; doi: 10.1093/nar/gkp416
Carmona-Saez P, Chagoyen M, Tirado F, Carazo JM, Pascual-Montano A: GENECODIS: A web-based tool for finding significant concurrent annotations in gene lists.
Genome Biology 2007 8(1):R3
